# Supplementary material for: Two Fusarium copper radical oxidases with high activity on aryl alcohols
Source: PubMed Central journal article supplement (PMC8207647; doi:10.1186/s13068-021-01984-0), 2021-06-16
Supplement: 13068_2021_1984_MOESM1_ESM.pdf [file 13068_2021_1984_MOESM1_ESM.pdf]

## Supporting Tables

**Table S1. Pairwise sequence ID/similarity matrix between *FgrAAO* and *FoxAAO* and other AA5\_2 enzymes.** Sequence similarity is highlighted in turquoise and sequence identity is highlighted in blue.

|                                 | 1    | 2    | 3    | 4    | 5    | 6    | 7    | 8    | 9    | 10   |
|---------------------------------|------|------|------|------|------|------|------|------|------|------|
| 1. <i>FgrAAO</i> (XP_011322138) |      | 91.3 | 58.0 | 55.4 | 54.7 | 78.2 | 79.1 | 54.8 | 42.2 | 35.9 |
| 2. <i>FoxAAO</i> (XP_018246910) | 95.1 |      | 57.3 | 54.7 | 53.9 | 82.8 | 84.2 | 54.0 | 41.2 | 35.9 |
| 3. <i>FgrGalOx</i> (AAO95371)   | 72.1 | 70.6 |      | 77.7 | 90.0 | 59.2 | 59.1 | 76.9 | 37.6 | 38.8 |
| 4. <i>FoxGalOx</i> (AHA90705)   | 68.1 | 67   | 86.9 |      | 81.3 | 60.7 | 60.6 | 94.9 | 36.7 | 39.5 |
| 5. <i>FsaGalOx</i> (AIR07394)   | 67.7 | 66.4 | 92.6 | 91.0 |      | 59.9 | 59.4 | 80.2 | 35.4 | 39.2 |
| 6. <i>FsuAA5</i> (ADG08187)     | 81.7 | 84.7 | 71.9 | 76.1 | 74.7 |      | 96.9 | 60.6 | 35.8 | 36.8 |
| 7. <i>FveAA5</i> (ADG08188)     | 82.3 | 85.4 | 72.0 | 75.3 | 74.4 | 98.4 |      | 60.3 | 35.8 | 36.8 |
| 8. <i>FsuGalOx</i> (AJE27923)   | 68.6 | 67.3 | 86.5 | 97.5 | 90.6 | 76.1 | 75.9 |      | 36.2 | 39.3 |
| 9. <i>CgrAlcOx</i> (EFQ30446)   | 57.2 | 57.1 | 52.1 | 50.5 | 49.2 | 50.2 | 50.1 | 50.7 |      | 33.4 |
| 10. <i>CgrAAO</i> (EFQ27661)    | 51.1 | 50.9 | 54.4 | 56.8 | 55.4 | 54.1 | 54.3 | 56.1 | 47.3 |      |

**Table S2. Initial activity screens\* of *FgrAAO* and *FoxAAO***

|                                        | Substrate                                      | Specific Activity ( $\mu\text{mol}\cdot\text{min}^{-1}\cdot\text{mg}^{-1}$ ) |                  |
|----------------------------------------|------------------------------------------------|------------------------------------------------------------------------------|------------------|
|                                        |                                                | <i>FgrAAO</i>                                                                | <i>FoxAAO</i>    |
| <b>Carbohydrates</b>                   | D-Galactose (300mM)                            | 2.99 $\pm$ 0.06                                                              | 2.51 $\pm$ 0.10  |
|                                        | D-Lactose (300mM)                              | 2.59 $\pm$ 0.03                                                              | 2.29 $\pm$ 0.42  |
|                                        | Raffinose (300mM)                              | 1.41 $\pm$ 0.04                                                              | 1.24 $\pm$ 0.23  |
|                                        | D-Mannose (300mM)                              | 9.40 $\pm$ 0.37                                                              | 5.68 $\pm$ 0.25  |
|                                        | Melibiose (300mM)                              | 2.00 $\pm$ 0.02                                                              | 0.60 $\pm$ 0.04  |
|                                        | D-Fructose (300mM)                             | 3.00 $\pm$ 0.07                                                              | 3.33 $\pm$ 0.12  |
|                                        | D-Xylose (300mM)                               | 0.30 $\pm$ 0.03                                                              | 0.09 $\pm$ 0.07  |
|                                        | D-Glucose (300mM)                              | 0.15 $\pm$ 0.01                                                              | 0.09 $\pm$ 0.00  |
|                                        | Sucrose (300mM)                                | 0.22 $\pm$ 0.01                                                              | 0.25 $\pm$ 0.00  |
|                                        | D-Ribose (300mM)                               | n.m.§                                                                        | n.m.§            |
|                                        | L-Arabinose (300mM)                            | n.m.§                                                                        | n.m.§            |
|                                        | Xyloglucan (2.5 mg.ml <sup>-1</sup> )          | 0.01 $\pm$ 0.00                                                              | n.m.§            |
|                                        | Carab Galactomannan (2.5 mg.ml <sup>-1</sup> ) | 0.09 $\pm$ 0.02                                                              | 0.04 $\pm$ 0.01  |
|                                        | Levan (2.5 mg.ml <sup>-1</sup> )               | 0.01 $\pm$ 0.00                                                              | n.m.§            |
|                                        | Inulin (2.5 mg.ml <sup>-1</sup> )              | n.m.§                                                                        | n.m.§            |
|                                        | Fructo Oligos (2.5 mg.ml <sup>-1</sup> )       | 0.03 $\pm$ 0.00                                                              | n.m.§            |
| Beta Mannan (2.5 mg.ml <sup>-1</sup> ) | n.m.§                                          | n.m.§                                                                        |                  |
| <b>Polyols</b>                         | Glycerol (300mM)                               | 1.53 $\pm$ 0.02                                                              | 1.24 $\pm$ 0.02  |
|                                        | Sorbitol (300mM)                               | 0.09 $\pm$ 0.00                                                              | 0.07 $\pm$ 0.00  |
|                                        | Galactitol (300mM)                             | 0.04 $\pm$ 0.00                                                              | 0.03 $\pm$ 0.00  |
|                                        | Mannitol (300mM)                               | 0.11 $\pm$ 0.00                                                              | 0.07 $\pm$ 0.00  |
| <b>Diols</b>                           | 1,3-Propanediol (300mM)                        | 0.26 $\pm$ 0.00                                                              | 0.20 $\pm$ 0.00  |
|                                        | 1,2-Propanediol (300mM)                        | 0.23 $\pm$ 0.00                                                              | 0.15 $\pm$ 0.00  |
|                                        | 1,4-Butanediol (300mM)                         | 0.34 $\pm$ 0.00                                                              | 0.25 $\pm$ 0.01  |
| <b>Aldehyde</b>                        | Methyl Glyoxal (5mM)                           | 0.25 $\pm$ 0.04                                                              | 0.07 $\pm$ 0.01  |
| <b>Primary alcohols</b>                | Ethanol (300mM)                                | 0.06 $\pm$ 0.00                                                              | 0.04 $\pm$ 0.00  |
|                                        | Methanol (300mM)                               | 0.05 $\pm$ 0.00                                                              | 0.03 $\pm$ 0.00  |
|                                        | 1-Butanol (300mM)                              | 0.09 $\pm$ 0.00                                                              | 0.05 $\pm$ 0.00  |
|                                        | Hexanol (300mM)                                | 0.03 $\pm$ 0.00                                                              | 0.08 $\pm$ 0.00  |
|                                        | 2-Phenylethanol (1mM)                          | 0.01 $\pm$ 0.00                                                              | n.m.§            |
| <b>Secondary alcohols</b>              | 1-Phenylethanol (1mM)                          | n.m.§                                                                        | n.m.§            |
| <b>Aryl alcohols</b>                   | Benzyl alcohol (5mM)                           | 1.23 $\pm$ 0.03                                                              | 1.23 $\pm$ 0.02  |
|                                        | Cinnamyl alcohol (5mM)                         | 4.90 $\pm$ 0.13                                                              | 5.00 $\pm$ 0.08  |
|                                        | 4-methoxybenzyl alcohol (5mM)                  | 0.89 $\pm$ 0.02                                                              | 0.98 $\pm$ 0.02  |
|                                        | 3-methoxybenzyl alcohol (5mM)                  | 12.21 $\pm$ 0.09                                                             | 16.41 $\pm$ 0.25 |
|                                        | Coniferyl alcohol (5mM)                        | n.m.§                                                                        | n.m.§            |
|                                        | Veratryl alcohol (5mM)                         | 20.13 $\pm$ 0.42                                                             | 25.19 $\pm$ 0.89 |
|                                        | 4-hydroxybenzyl alcohol (5mM)                  | 1.05 $\pm$ 0.09                                                              | 0.45 $\pm$ 0.10  |
|                                        | Vanillyl alcohol (5mM)                         | 0.01 $\pm$ 0.00                                                              | n.m.§            |
| <b>Furans</b>                          | HMF (5mM)                                      | 3.00 $\pm$ 0.09                                                              | 3.46 $\pm$ 0.13  |
|                                        | DFF (5mM)                                      | 0.91 $\pm$ 0.04                                                              | 0.98 $\pm$ 0.18  |
|                                        | HMFCa (5mM)                                    | 1.82 $\pm$ 0.07                                                              | 2.64 $\pm$ 0.35  |
|                                        | FFCA (5mM)                                     | n.m.§                                                                        | n.m.§            |

\*Measurements were performed in triplicate at 25 °C in 50 mM sodium phosphate buffer, pH 7.5, using the HRP/ABTS assay. Activities were monitored using concentrations indicated within parentheses for each substrate.

§No activity detected with a specific activity limit of detection of  $9 \times 10^{-4} \mu\text{mol}\cdot\text{min}^{-1}\cdot\text{mg}^{-1}$  using 1 nmole of purified enzyme.

**Table S3. Comparison of catalytic parameters of *FgrAAO* and *FoxAAO* with other enzymes acting on galactose, fructose and mannose\***

| Enzyme                           | Galactose  |                              |                                                   | Fructose     |                              |                                                   | Mannose    |                              |                                                   | References |
|----------------------------------|------------|------------------------------|---------------------------------------------------|--------------|------------------------------|---------------------------------------------------|------------|------------------------------|---------------------------------------------------|------------|
|                                  | $K_M$ (mM) | $k_{cat}$ (s <sup>-1</sup> ) | $k_{cat}/K_M$ (M <sup>-1</sup> .s <sup>-1</sup> ) | $K_M$ (mM)   | $k_{cat}$ (s <sup>-1</sup> ) | $k_{cat}/K_M$ (M <sup>-1</sup> .s <sup>-1</sup> ) | $K_M$ (mM) | $k_{cat}$ (s <sup>-1</sup> ) | $k_{cat}/K_M$ (M <sup>-1</sup> .s <sup>-1</sup> ) |            |
| <i>FgrAAO</i>                    | 1700 ± 150 | 21 ± 1.0                     | <b>12</b>                                         | 460 ± 91     | 9.7 ± 0.55                   | <b>21</b>                                         | 450 ± 74   | 36 ± 1.2                     | <b>79</b>                                         | This work  |
| <i>FoxAAO</i>                    | 1600 ± 150 | 23 ± 1.2                     | <b>14</b>                                         | 510 ± 82     | 16 ± 0.72                    | <b>31</b>                                         | 620 ± 57   | 19 ± 0.35                    | <b>31</b>                                         | This work  |
| <i>FgrGalOx</i>                  | 102 ± 6.4  | 1059 ± 18.9                  | <b>10400 ± 680</b>                                | 2.48 ± 0.512 | 22.8 ± 3.57                  | <b>9.2 ± 2.4</b>                                  | ND         | ND                           | <b>ND</b>                                         | [1]        |
| R330K <sup>a</sup>               | 895 ± 85.9 | 208 ± 10.8                   | <b>232 ± 25</b>                                   | 1.81 ± 0.111 | 80.4 ± 5.01                  | <b>75.1 ± 9.1</b>                                 | ND         | ND                           | <b>ND</b>                                         | [1]        |
| M <sub>1</sub> <sup>a</sup>      | 43 ± 2     | 1376 ± 35                    | <b>32 000 ± 1700</b>                              | ND           | ND                           | <b>ND</b>                                         | ND         | ND                           | <b>ND</b>                                         | [2]        |
| M <sub>3</sub> <sup>b</sup>      | 54 ± 7     | 1800 ± 400                   | <b>31 ± 7</b>                                     | ND           | ND                           | <b>ND</b>                                         | ND         | ND                           | <b>ND</b>                                         | [3]        |
| Des 3-2 <sup>a</sup>             | ND         | ND                           | <b>1100 ± 300</b>                                 | ND           | ND                           | <b>ND</b>                                         | ND         | ND                           | <b>ND</b>                                         | [4]        |
| H <sub>1</sub> <sup>b</sup>      | ND         | ND                           | <b>ND</b>                                         | ND           | ND                           | <b>ND</b>                                         | ND         | ND                           | <b>35 ± 3</b>                                     | [5]        |
| C383N <sup>a</sup>               | 390 ± 38   | 410 ± 17                     | <b>1100 ± 150</b>                                 | ND           | ND                           | <b>ND</b>                                         | ND         | ND                           | <b>ND</b>                                         | [6]        |
| C383S, Y436H, V494A <sup>a</sup> | 19 ± 2     | 1301 ± 46                    | <b>68500 ± 7600</b>                               | ND           | ND                           | <b>ND</b>                                         | ND         | ND                           | <b>ND</b>                                         | [7]        |
| V494A <sup>a</sup>               | 53 ± 8     | 1119 ± 66                    | <b>21100 ± 3400</b>                               | ND           | ND                           | <b>ND</b>                                         | ND         | ND                           | <b>ND</b>                                         | [7]        |
| <i>CgrAAO</i>                    | ND         | ND                           | <b>13.1 ± 0.8</b>                                 | ND           | ND                           | <b>ND</b>                                         | ND         | ND                           | <b>ND</b>                                         | [8]        |

\* When comparing catalytic constants, please note that different assay temperatures, generally in the range 25 °C - 35 °C, may have been used for each enzyme, as described in the original publication cited. ND = not determined.

<sup>a</sup> WT *FgrGalOx* background; <sup>b</sup> *FgrGalOx* M<sub>1</sub> background. M<sub>1</sub> = S10P, M70V, P136, G195E, V494A, N353D; M<sub>3</sub> = W290F, R330K and Q406T, Des 3-2 = Q326E, Y329K and R330K, H<sub>1</sub> = R330K

**Table S4. Comparison of catalytic parameters of *Fgr*AAO and *Fox*AAO with other enzymes acting on benzyl alcohol and other aryl alcohols\***

| Enzyme           | <i>Benzyl alcohol</i>          |                              |                                                   | <i>Cinnamyl alcohol</i>        |                              |                                                   | References |
|------------------|--------------------------------|------------------------------|---------------------------------------------------|--------------------------------|------------------------------|---------------------------------------------------|------------|
|                  | $K_M$ (mM)                     | $k_{cat}$ (s <sup>-1</sup> ) | $k_{cat}/K_M$ (M <sup>-1</sup> .s <sup>-1</sup> ) | $K_M$ (mM)                     | $k_{cat}$ (s <sup>-1</sup> ) | $k_{cat}/K_M$ (M <sup>-1</sup> .s <sup>-1</sup> ) |            |
| <i>Fgr</i> AAO   | 86 ± 12                        | 37 ± 2.8                     | <b>430</b>                                        | ND                             | ND                           | 3000                                              | This work  |
| <i>Fox</i> AAO   | 30 ± 19                        | 31 ± 4.2                     | <b>1000</b>                                       | ND                             | ND                           | 3200                                              | This work  |
| <i>Fgr</i> GalOx | ND                             | ND                           | <b>424 ± 2</b>                                    | ND                             | ND                           | ND                                                | [9]        |
| <i>Cgr</i> AlcOx | 10.69 ± 0.04                   | 94 ± 1                       | <b>140000</b>                                     | 0.06 ± 0.003                   | 93 ± 1                       | 1600000                                           | [10]       |
| <i>Cgr</i> AAO   | 27 ± 0.9                       | 54.5 ± 0.6                   | <b>2020 ± 70</b>                                  | ND                             | ND                           | ND                                                | [8]        |
|                  | <i>3-methoxybenzyl alcohol</i> |                              |                                                   | <i>4-methoxybenzyl alcohol</i> |                              |                                                   | References |
|                  | $K_M$ (mM)                     | $k_{cat}$ (s <sup>-1</sup> ) | $k_{cat}/K_M$ (M <sup>-1</sup> .s <sup>-1</sup> ) | $K_M$ (mM)                     | $k_{cat}$ (s <sup>-1</sup> ) | $k_{cat}/K_M$ (M <sup>-1</sup> .s <sup>-1</sup> ) |            |
| <i>Fgr</i> AAO   | 6.5 ± 1.5                      | 52 ± 1.5                     | <b>8000</b>                                       | 59 ± 7.2                       | 32 ± 1.8                     | <b>540</b>                                        | This work  |
| <i>Fox</i> AAO   | 6.7 ± 0.59                     | 34 ± 1.7                     | <b>5100</b>                                       | 51 ± 12                        | 34 ± 2.9                     | <b>290</b>                                        | This work  |
| <i>Fgr</i> GalOx | ND                             | ND                           | <b>4172 ± 14</b>                                  | ND                             | ND                           | <b>449 ± 2</b>                                    | [9]        |
| <i>Cgr</i> AlcOx | ND                             | ND                           | <b>ND</b>                                         | ND                             | ND                           | <b>ND</b>                                         | [10]       |
| <i>Cgr</i> AAO   | 21 ± 0.8                       | 140 ± 2                      | <b>6600 ± 300</b>                                 | 24 ± 1.3                       | 48 ± 1                       | <b>2000 ± 120</b>                                 | [8]        |

\* When comparing catalytic constants, please note that different assay temperatures, generally in the range 25 °C - 35 °C, may have been used for each enzyme, as described in the original publication cited. ND = not determined.

**Table S5. Comparison of catalytic parameters of *Fgr*AAO and *Fox*AAO with other enzymes acting on HMF and its derivatives\***

| Enzyme           | HMF          |                              |                                                   | DFP         |                              |                                                   | HMFCFA     |                              |                                                   | FFCA        |                              |                                                   | References |
|------------------|--------------|------------------------------|---------------------------------------------------|-------------|------------------------------|---------------------------------------------------|------------|------------------------------|---------------------------------------------------|-------------|------------------------------|---------------------------------------------------|------------|
|                  | $K_M$ (mM)   | $k_{cat}$ (s <sup>-1</sup> ) | $k_{cat}/K_M$ (M <sup>-1</sup> .s <sup>-1</sup> ) | $K_M$ (mM)  | $k_{cat}$ (s <sup>-1</sup> ) | $k_{cat}/K_M$ (M <sup>-1</sup> .s <sup>-1</sup> ) | $K_M$ (mM) | $k_{cat}$ (s <sup>-1</sup> ) | $k_{cat}/K_M$ (M <sup>-1</sup> .s <sup>-1</sup> ) | $K_M$ (mM)  | $k_{cat}$ (s <sup>-1</sup> ) | $k_{cat}/K_M$ (M <sup>-1</sup> .s <sup>-1</sup> ) |            |
| <i>Fgr</i> AAO   | 14 ± 2.6     | 29 ± 1.7                     | <b>2100</b>                                       | 10 ± 2.9    | 3.6 ± 0.27                   | <b>360</b>                                        | 4.4 ± 0.90 | 3.8 ± 0.33                   | <b>860</b>                                        | ND          | ND                           | <b>ND</b>                                         | This work  |
| <i>Fox</i> AAO   | 17 ± 4.9     | 26 ± 2.6                     | <b>1500</b>                                       | 3.7 ± 1.0   | 1.4 ± 0.13                   | <b>380</b>                                        | 3.1 ± 0.31 | 5.2 ± 0.14                   | <b>1700</b>                                       | ND          | ND                           | <b>ND</b>                                         | This work  |
| <i>Cgr</i> AAO   | 6.5 ± 0.3    | 126 ± 1.5                    | <b>1940 ± 90</b>                                  | ND          | ND                           | <b>ND</b>                                         | 26.9 ± 3   | 28.3 ± 1.3                   | <b>1100 ± 100</b>                                 | ND          | ND                           | <b>ND</b>                                         | [8]        |
| Bacterial HMFO   | 1.4          | 9.9                          | <b>7100</b>                                       | 1.7         | 1.6                          | <b>940</b>                                        | 73         | 8.5                          | <b>120</b>                                        | ND          | ND                           | <b>&lt;10</b>                                     | [11]       |
| <i>Per</i> AAO   | 1.6 ± 0.2    | 0.33 ± 0.01                  | <b>220 ± 42</b>                                   | 3.3 ± 0.2   | 0.52 ± 0.01                  | <b>158 ± 9.2</b>                                  | ND         | ND                           | <b>ND</b>                                         | ND          | ND                           | <b>ND</b>                                         | [12]       |
| <i>Mt</i> GLOX   | 20.2 ± 9.0   | 15.9                         | <b>982</b>                                        | ND          | ND                           | <b>ND</b>                                         | ND         | ND                           | <b>ND</b>                                         | ND          | ND                           | <b>ND</b>                                         | [13]       |
| <i>Pci</i> GLOX1 | 15.66 ± 2.35 | 1.59 ± 0.12                  | <b>101.66 ± 0.01</b>                              | 4.38 ± 0.1  | 0.54 ± 0.24                  | <b>124.39 ± 0.01</b>                              | ND         | ND                           | <b>ND</b>                                         | 0.85 ± 0.14 | 0.03 ± 0.01                  | <b>38.55 ± 0.01</b>                               | [14]       |
| <i>Pci</i> GLOX2 | 5.87 ± 2.04  | 0.56 ± 0.09                  | <b>96.04 ± 0.01</b>                               | 0.21 ± 0.04 | 4.80 ± 0.24                  | <b>23400 ± 100</b>                                | ND         | ND                           | <b>ND</b>                                         | 1.40 ± 0.39 | 2.02 ± 0.03                  | <b>1400 ± 10</b>                                  | [14]       |
| <i>Pci</i> GLOX3 | 6.35 ± 1.32  | 0.75 ± 0.07                  | <b>118.35 ± 0.01</b>                              | 8 ± 0.05    | 1.28 ± 0.09                  | <b>7300 ± 10</b>                                  | ND         | ND                           | <b>ND</b>                                         | 0.61 ± 0.58 | 0.04 ± 0.01                  | <b>72.03 ± 0.01</b>                               | [14]       |

\* When comparing catalytic constants, please note that different assay temperatures, generally in the range 25 °C - 35 °C, may have been used for each enzyme, as described in the original publication cited. ND = not determined.

**Table S6. Assignments of <sup>1</sup>H chemical shifts (ppm) of substrates and products of *Fgr*AAO oxidation of 1-O-Methyl D-fructose as determined by 1D and 2D NMR experiments recorded at 400MHz in D<sub>2</sub>O. The peaks are referenced to internal acetone (2.22 ppm).**

| Compound | H-1       | H-3      | H-4             | H-5      | H-6       | -OMe     |
|----------|-----------|----------|-----------------|----------|-----------|----------|
| <b>3</b> | 3.77 (S)  | 3.93 (D) | 3.87 - 3.84 (M) | 3.82 (M) | 3.76 (DD) | 3.28 (S) |
| <b>8</b> | 5.17 (S)  | 4.09 (D) | 3.87 - 3.85 (M) | 3.97 (M) | 3.77 (S)  | 3.37 (S) |
| <b>2</b> | 3.68 (DD) | 4.17 (D) | 3.87 -3.83 (M)  | 4.05 (T) | 3.72 (DD) | 3.32 (S) |
| <b>7</b> | 3.70 (DD) | 4.17 (S) | 3.64 (S)        | 4.17 (S) | 4.95 (D)  | 3.30 (S) |
| <b>1</b> | 3.72 (DD) | 4.10 (M) | 3.96 (M)        | 3.96 (M) | 3.75 (DD) | 3.32 (S) |

**Table S7. Assignments of <sup>13</sup>C chemical shifts (ppm) of compounds substrates and products of *Fgr*AAO oxidation of 1-O-Methyl D-fructose as determined by 1D and 2D NMR experiments recorded at 400MHz in D<sub>2</sub>O. The peaks are referenced to internal acetone (30.89 ppm).**

| Compound | C-1  | C-2   | C-3  | C-4  | C-5  | C-6  | -OMe |
|----------|------|-------|------|------|------|------|------|
| <b>3</b> | 61.4 | 101.0 | 68.9 | 70.2 | 69.6 | 64.4 | 49.1 |
| <b>8</b> | 90.0 | 99.7  | 68.5 | 70.3 | 69.4 | 64.7 | 49.8 |
| <b>2</b> | 60.3 | 104.4 | 77.4 | 81.6 | 75.6 | 63.3 | 49.6 |
| <b>7</b> | 59.7 | 104.7 | 77.7 | 83.2 | 76.9 | 91.6 | 49.3 |
| <b>1</b> | 58.3 | 108.9 | 80.7 | 83.9 | 78.0 | 61.9 | 48.8 |

**Table S8. Assignments of  $^1\text{H}$  and  $^{13}\text{C}$  chemical shifts (ppm) of *Fgr*AAO oxidation of raffinose as determined by 1D and 2D NMR experiments recorded at 400MHz in  $\text{D}_2\text{O}$ . The peaks are referenced to internal acetone (2.22 ppm).**

| Ring System<br>$^1\text{H}$     | $\delta$<br>(ppm) | Multiplicity | Coupling Constant (J)<br>(Hz) | Ring System<br>$^{13}\text{C}$ | $\delta$<br>(ppm) |
|---------------------------------|-------------------|--------------|-------------------------------|--------------------------------|-------------------|
| <b>Galactose (Product)</b>      |                   |              |                               | <b>Galactose (Product)</b>     |                   |
| H <sub>1</sub>                  | 3.55 or 3.64      | M            | n.a.                          | C <sub>1</sub>                 | n.a.              |
| H <sub>2</sub>                  | 3.55 or 3.64      | M            | n.a.                          | C <sub>2</sub>                 | n.a.              |
| H <sub>3</sub>                  | 4.54              | DD           | 2.98; 8.02                    | C <sub>3</sub>                 | 66.41             |
| H <sub>4</sub>                  | 5.27              | D            | 2.54                          | C <sub>4</sub>                 | 99.96             |
| H <sub>5</sub>                  | 3.89              | M            | n.a.                          | C <sub>5</sub>                 | 70.54             |
| H <sub>6</sub>                  | 6.19              | D            | 3.00                          | C <sub>6</sub>                 | 125.11            |
| <b>Galactose (Substrate)</b>    |                   |              |                               | <b>Galactose (Substrate)</b>   |                   |
| H <sub>1</sub>                  | 4.99              | D            | 3.63                          | C <sub>1</sub>                 | 99.09             |
| H <sub>2</sub>                  | 3.83              | M            | n.a.                          | C <sub>2</sub>                 | 69.10             |
| H <sub>3</sub>                  | 3.89              | M            | n.a.                          | C <sub>3</sub>                 | 70.07             |
| H <sub>4</sub>                  | 4.00              | D            | n.a.                          | C <sub>4</sub>                 | 69.82             |
| H <sub>5</sub>                  | 3.95              | T            | 6.28                          | C <sub>5</sub>                 | 71.64             |
| H <sub>6</sub> /H' <sub>6</sub> | 3.76              | M            | n.a.                          | C <sub>6</sub>                 | 61.72             |
| <b>Glucose (Product)</b>        |                   |              |                               | <b>Glucose</b>                 |                   |
| H <sub>1</sub>                  | 5.39              | D            | 3.91                          | C <sub>1</sub>                 | 92.70             |
| H <sub>2</sub>                  | 3.55              | M            | n.a.                          | C <sub>2</sub>                 | n.a.              |
| H <sub>3</sub>                  | 3.76              | M            | n.a.                          | C <sub>3</sub>                 | 73.22             |
| H <sub>4</sub>                  | 3.55              | M            | n.a.                          | C <sub>4</sub>                 | 69.98             |
| H <sub>5</sub>                  | 4.00              | D            | n.a.                          | C <sub>5</sub>                 | 71.98             |
| H <sub>6</sub> /H' <sub>6</sub> | 4.05; 3.89        | M; M         | n.a.                          | C <sub>6</sub>                 | 67.94             |
| <b>Glucose (Substrate)</b>      |                   |              |                               | <b>Glucose (Substrate)</b>     |                   |
| H <sub>1</sub>                  | 5.42              | D            | 3.83                          | C <sub>1</sub>                 | 92.73             |
| H <sub>2</sub>                  | 3.55              | M            | n.a.                          | C <sub>2</sub>                 | 71.58             |
| H <sub>3</sub>                  | 3.76              | M            | n.a.                          | C <sub>3</sub>                 | 73.27             |
| H <sub>4</sub>                  | 3.55              | M            | n.a.                          | C <sub>4</sub>                 | 70.02             |
| H <sub>5</sub>                  | 4.05              | M            | n.a.                          | C <sub>5</sub>                 | 72.02             |
| H <sub>6</sub> /H' <sub>6</sub> | 4.05; 3.70        | M; M         | n.a.                          | C <sub>6</sub>                 | 66.50             |
| <b>Fructose (Product)</b>       |                   |              |                               | <b>Fructose (Product)</b>      |                   |
| H <sub>1</sub> /H' <sub>1</sub> | 3.70              | M            | n.a.                          | C <sub>1</sub>                 | 70.21             |
| H <sub>3</sub>                  | 4.14              | M            | n.a.                          | C <sub>2</sub>                 | 104.39            |
| H <sub>4</sub>                  | 3.55              | M            | n.a.                          | C <sub>3</sub>                 | 69.34             |
| H <sub>5</sub>                  | 3.64              | M            | n.a.                          | C <sub>4</sub>                 | 74.67             |
| H <sub>6</sub>                  | 5.12              | D            | 7.36                          | C <sub>5</sub>                 | 73.40             |
|                                 |                   |              |                               | C <sub>6</sub>                 | 89.09             |
| <b>Fructose (Substrate)</b>     |                   |              |                               | <b>Fructose (Substrate)</b>    |                   |
| H <sub>1</sub> /H' <sub>1</sub> | 3.64              | M            | n.a.                          | C <sub>1</sub>                 | 62.01             |
| H <sub>3</sub>                  | 4.21              | M            | n.a.                          | C <sub>2</sub>                 | 104.43            |
| H <sub>4</sub>                  | 4.05              | M            | n.a.                          | C <sub>3</sub>                 | 76.95             |
| H <sub>5</sub>                  | 3.89              | M            | n.a.                          | C <sub>4</sub>                 | 74.60             |
| H <sub>6</sub> /H' <sub>6</sub> | 3.83; 3.76        | M; M         | n.a.                          | C <sub>5</sub>                 | 81.97             |
|                                 |                   |              |                               | C <sub>6</sub>                 | 63.09             |



## Supporting Figures

|                 |                                                                                         |
|-----------------|-----------------------------------------------------------------------------------------|
| <i>FgrAAO</i>   | --GVGKKGPTLDFPVI PVAGAVEPVSGKVVIWSAYRYDA <b>FQ</b> GTNPRGGFTLTSIWDPKTN                  |
| <i>FoxAAO</i>   | AKGLGKKGPTLDFPVI PVAGAVEPVSGKVVIWSAYRYDA <b>FQ</b> GTPRGGFTLTSIWDPKTN                   |
| <i>FgrGalOx</i> | --GLGRWGPTIDLPIVPA AAAIEPTSGRVL MWSSYRNDAB <b>FGG</b> SP--GGITLTSSWDPSTG                |
| <i>CgrAlcOx</i> | --NVGKKGPMVKFPVVPVAVALVPETGNLLVWSSG--WPNR <b>WT</b> TAGNGKTYTSLYNVNTG                   |
| <i>FgrAAO</i>   | VISNRNVTNNKHDMF <b>C</b> PGISMDGEGQIVVTGGNDAKKTTILNP---NGE-WVPGPDMQIA                   |
| <i>FoxAAO</i>   | VISNRNVSNNHDMF <b>C</b> PGISMDGEGQIVVTGGNDAKKTTILMP---DGN-WVPGPDMQIA                    |
| <i>FgrGalOx</i> | IVSDRTVTVTKHDMF <b>C</b> PGISMDGNGQIVVTGGNDAKKTSLYDS---SSDSWIPGPDMQVA                   |
| <i>CgrAlcOx</i> | NISDAIVQNTQHDMF <b>C</b> PGTSLDADGRIIVTGGSSAAKTSVLDFFKKGESSPWTPLSNMQIS                  |
| <i>FgrAAO</i>   | RGY <b>Q</b> SSATTS DGRVFTIGGSWSGPRGGKNGE IYDPKARTWTS LPKCLVGPMLTKDK <b>EGVY</b>        |
| <i>FoxAAO</i>   | RGY <b>Q</b> SSATCSDGRVFTIGGSWSGPRGGKNGE IYDPKAKTWTS LPKCLVGPMLTKDK <b>EGVY</b>         |
| <i>FgrGalOx</i> | RGY <b>Q</b> SSATMSDGRVFTIGGSWSGGVFEKNGEVYSPSSKTTWTS LPNKVNPLMTADK <b>QGLY</b>          |
| <i>CgrAlcOx</i> | RGY <b>Q</b> SSCTTSEGIKIFVIGGSFSG-AGTRNGEVYDPKANTWTKLAGCPVKPLVM <b>QRG</b> --- <b>M</b> |
| <i>FgrAAO</i>   | <b>K</b> ADNHAWLFGWKKGSVFQAGPSTAMN WYYTTRGTQGDTKAAGTRRKNRVD PDSM <b>NG</b> NCV          |
| <i>FoxAAO</i>   | <b>K</b> ADNHAWLFGWKKNSVFQAGPSTAMN WYYTTRGTQGDTKAAGTRRKNRVID PDSM <b>NG</b> NVA         |
| <i>FgrGalOx</i> | <b>R</b> SDNHAWLFGWKKGSVFQAGPSTAMN WYYTSG--SGDVKSAGKRQSNRGVAPDAM <b>C</b> GNAV          |
| <i>CgrAlcOx</i> | <b>F</b> PDSHAWLWSWKNGSVLQAGPSKKMNWYDTKG-----TGSNTPAGLRGTDEDSM <b>C</b> GVSV            |
| <i>FgrAAO</i>   | MYDALDGKILTYGGATS <b>YQ</b> QAPATANAHVLAIAEPGAI AQTYLVGNNGAG <b>NY</b> ARVFHTSV         |
| <i>FoxAAO</i>   | MFDALNGKILTFGGATS <b>YQ</b> QAPATANAHVLTIDEPGAIAQTALVGNNGAG <b>I</b> HARVFATSV          |
| <i>FgrGalOx</i> | MYDAVKGKILTFGGSPD <b>YQ</b> SDATTNAHIITLGE PGTS PNTVFASNG-- <b>LY</b> FARTFHTSV         |
| <i>CgrAlcOx</i> | MYDAVAGKIFTYGGGK <b>YT</b> GYDSTSNAHILTLGEPGQAVQVQKLANG--- <b>K</b> YNRGFANAV           |
| <i>FgrAAO</i>   | VLPDGNVFI TGGQSYSN <b>PF</b> TD TNAQLTPEMYIPTTHEFKTQQPNTIPRT <b>YH</b> SMSLLL PDA       |
| <i>FoxAAO</i>   | I LPDGNVFI TGGQSYSD <b>PF</b> TD TNAQLEPEMFISSNTFTKQQTNTIPRT <b>YH</b> SMSLLL PDA       |
| <i>FgrGalOx</i> | VLPDGSTFITGGQRRGI <b>PF</b> EDSTPVFTPEIYVPEQDTFYKQNPNSIVRV <b>YH</b> SISLLL PDG         |
| <i>CgrAlcOx</i> | VMPDGKIWVVGGMQK <b>WLF</b> SDTT PQLTPELFD PATGSFTPTT PHTVPR <b>NYH</b> STALLMADA        |
| <i>FgrAAO</i>   | TVFNGGGGLCGS-CSSNHFDAQIYTPQYLLDGN-GNFATRPKITAVSATTAKIGSTITVT                            |
| <i>FoxAAO</i>   | TVFNGGGGLCGG-CKTNHFDAQIFTPQYLLDGN-GNLATRPKITAVSATTAKV GSTITVT                           |
| <i>FgrGalOx</i> | RVFNGGGGLCGD-CTTNHFDAQIFTPNYLYNSN-GNLATRPKITRTSTQSVKVGGRITIS                            |
| <i>CgrAlcOx</i> | TIWSGGGGLCGANCKENHFDGQFWSPPYLFEADGVTPAKRPVIQSLSDTAVRAGAPITIT                            |
| <i>FgrAAO</i>   | ANSA-IKSASLIRYGTAT <b>H</b> TVNTDQRRIPLALTGAG-TNKYSFKIPNDSGIALPGYWMLF                   |
| <i>FoxAAO</i>   | ANSA-IKSASLIRYGTAT <b>H</b> VVNTDQRRIPLALTGAG-TNKYSFKIPNDSGIALPGYWMLF                   |
| <i>FgrGalOx</i> | TDSS-ISKASLIRYGTAT <b>H</b> TVNTDQRRIPLTLTNNG-GNSYSFQVPSDSGVALPGYWMLF                   |
| <i>CgrAlcOx</i> | MQDAGAYTFSMIRVSAT <b>H</b> TVNTDQRRIPLDGQDGGDGKSFTVNVPNDYGVAIPGYWMLF                    |
| <i>FgrAAO</i>   | VLNNAGVPSVASTIKVTV                                                                      |
| <i>FoxAAO</i>   | VLNNAGVPSVASTIKVTI                                                                      |
| <i>FgrGalOx</i> | VMNSAGVPSVASTIRVTQ                                                                      |
| <i>CgrAlcOx</i> | AMNEAGVPCVAQFFKVTL                                                                      |

**Figure S1. Sequence alignment of catalytic domains of *Fusarium graminearum* AAO (*FgrAAO*), *Fusarium oxysporum* AAO (*FoxAAO*), *Fusarium graminearum* GalOx (*FgrGalOx*) and *Colletotrichum graminicola* AlcOx (*CgrAlcOx*). Predictive signal peptides and N-terminal modules have been removed. Conserved active-site catalytic residues and residues involved in substrate recognition and stability are highlighted in green and yellow, respectively.**

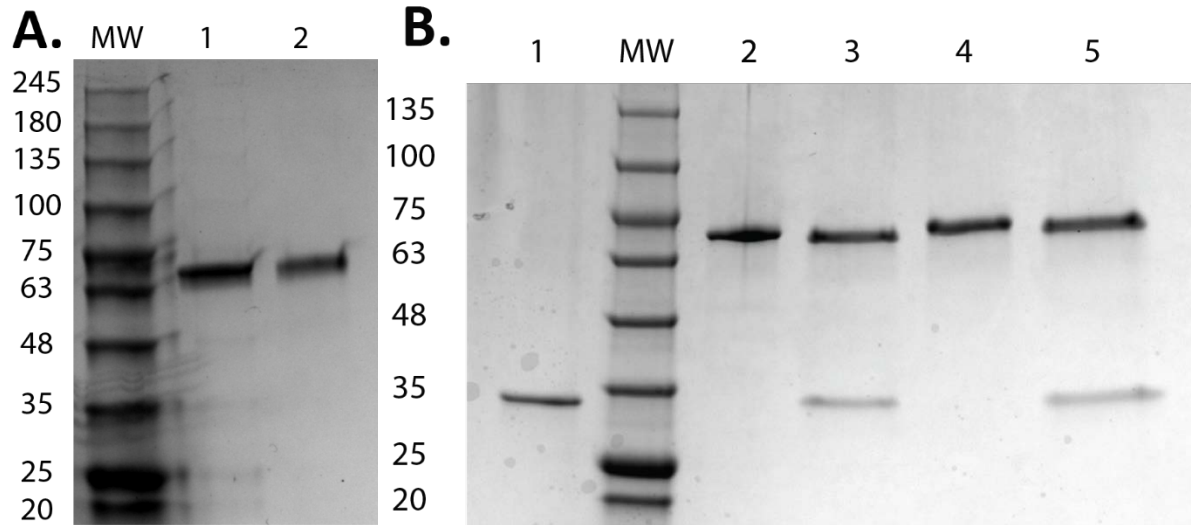

**Figure S2. SDS-PAGE of *FgrAAO* and *FoxAAO* and N-deglycosylation study.** A. Aliquot of purified *FgrAAO* (4  $\mu$ g) (lane 1) and purified *FoxAAO* (4  $\mu$ g) (lane 2). B. *FgrAAO* and *FoxAAO* (3  $\mu$ g 1 to 6) were N-deglycosylated under denaturing conditions with PNGaseF. 1: PNGaseF, 2: native *FgrAAO* (3  $\mu$ g), 3: *FgrAAO* (3  $\mu$ g) + pNGaseF, 4: native *FoxAAO* (3  $\mu$ g), 5: *FoxAAO* (3  $\mu$ g) + pNGaseF. All gels were stained by Coomassie blue. MW = molecular weight markers, as indicated.

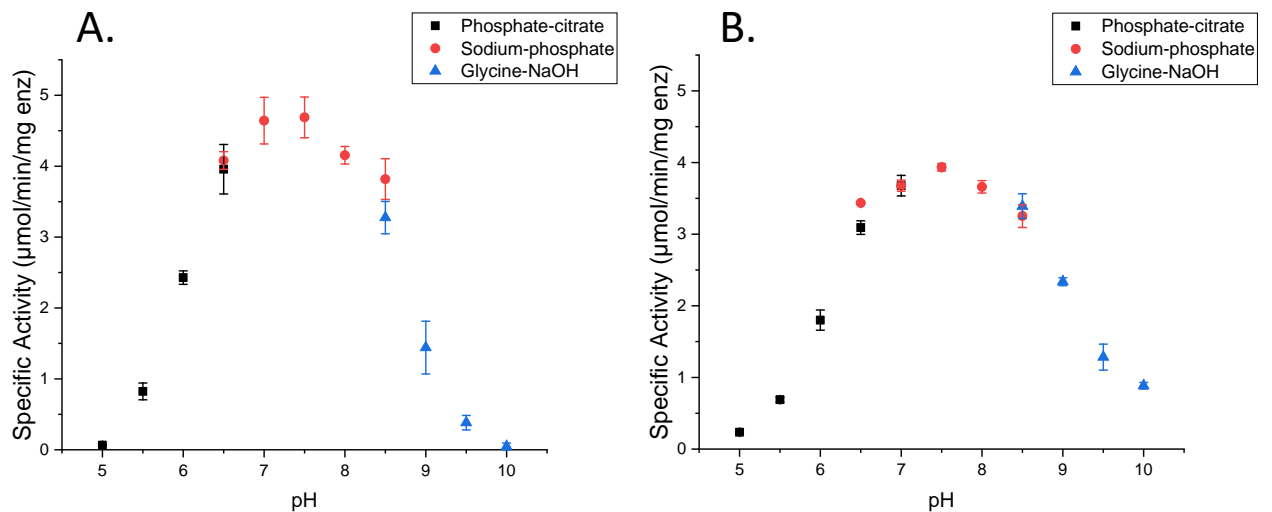

**Figure S3. pH-rate profiles.** A. *FgrAAO*; B. *FoxAAO*. pH-rate profiles were determined using the coupled HRP-ABTS assay with 1M galactose as the substrate at each pH value. Black squares for phosphate citrate buffer, red circles for sodium phosphate buffer and blue triangles for glycine NaOH buffer. Error bars represent standard deviations over three replicates.

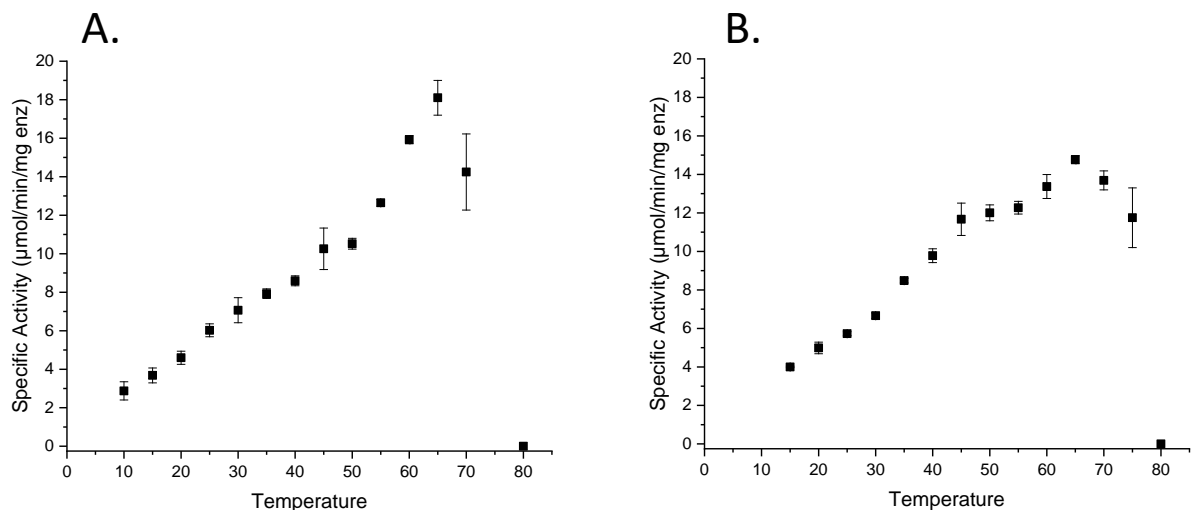

**Figure S4. Temperature-rate profiles.** A. *FgrAAO*; B. *FoxAAO*. Temperature-rate profiles were determined using the coupled HRP-ABTS assay. 50 mM sodium phosphate, pH 7.5 and 1M galactose were incubated at each temperature for at least 10 min prior to the addition of HRP, ABTS and purified enzyme. Error bars represent standard deviations over three replicates.

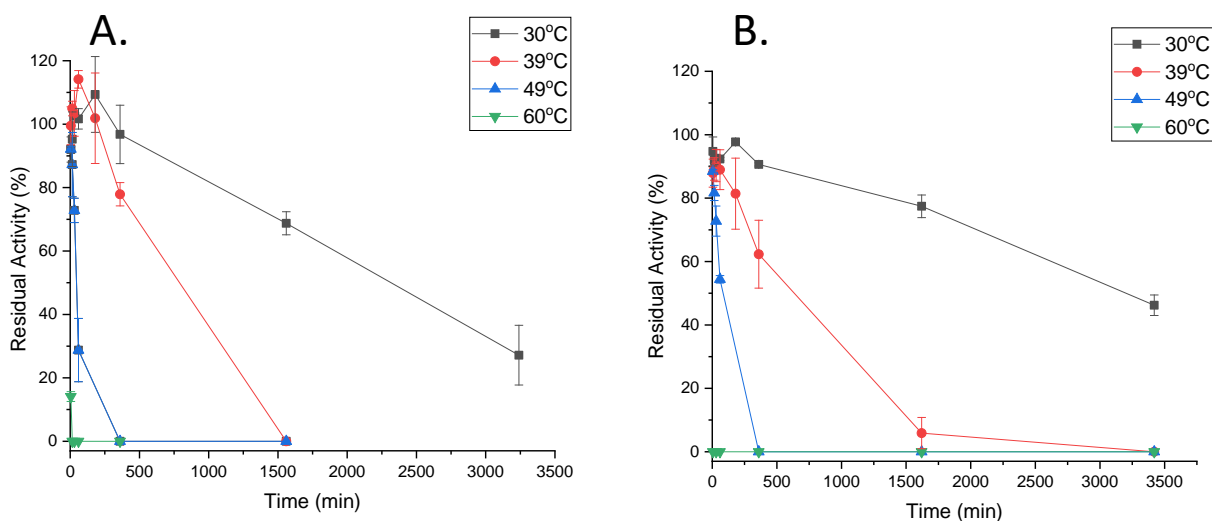

**Figure S5. Temperature stability.** A. *FgrAAO*; B. *FoxAAO*. Activity values were determined using the coupled HRP-ABTS assay with 1 M galactose as the substrate. The enzyme was pre-incubated at each temperature, maintained by a gradient thermocycler: 30°C (black square), 39°C (red circle), 49°C (blue triangle), 60°C (green triangle). The reactions were performed at 30°C. Error bars represent standard deviations over duplicate measurements.

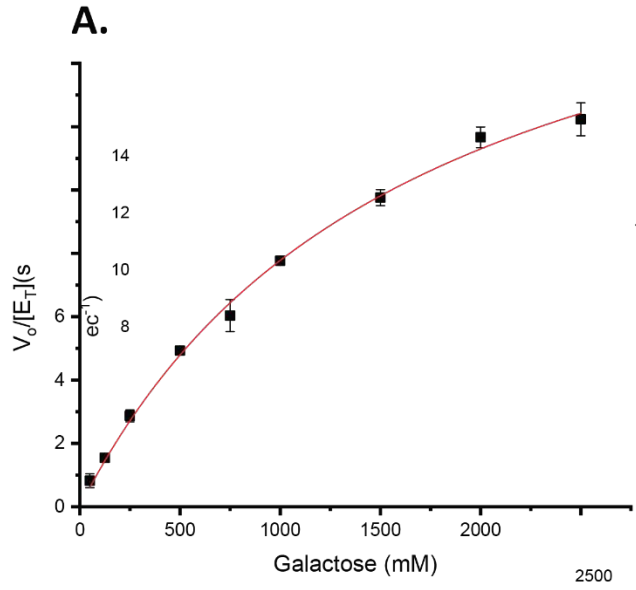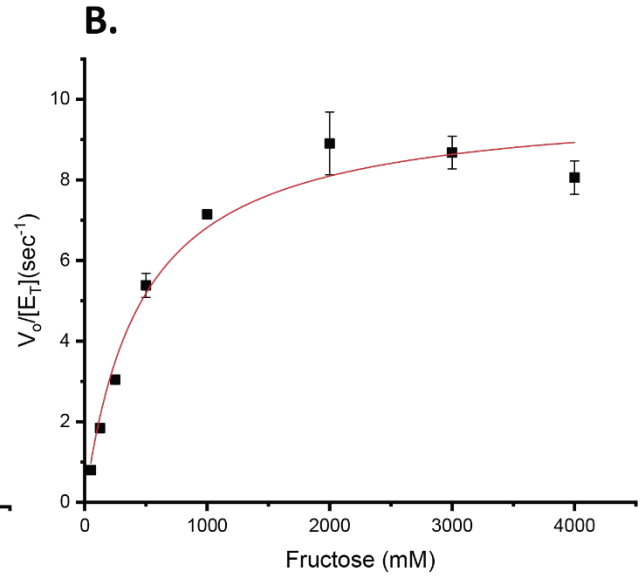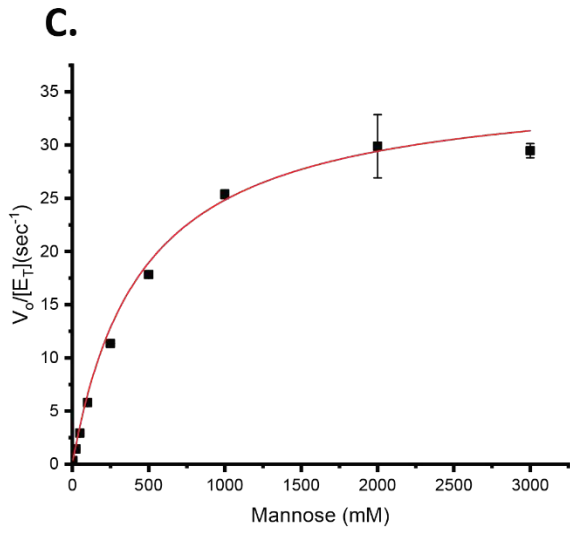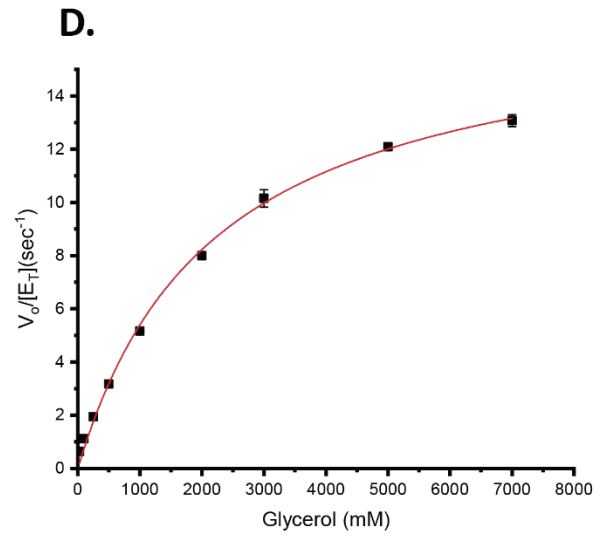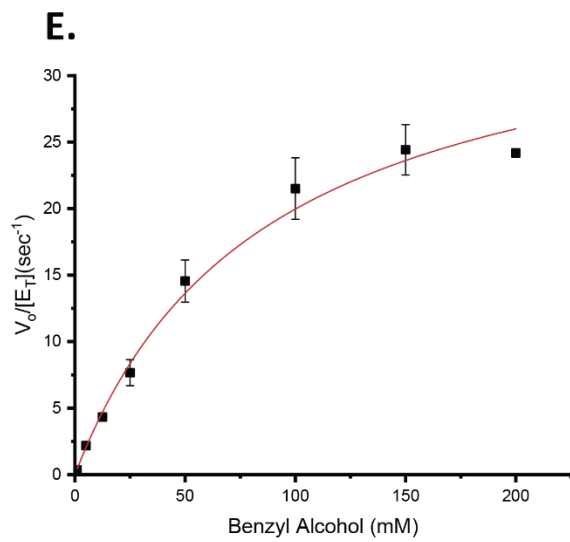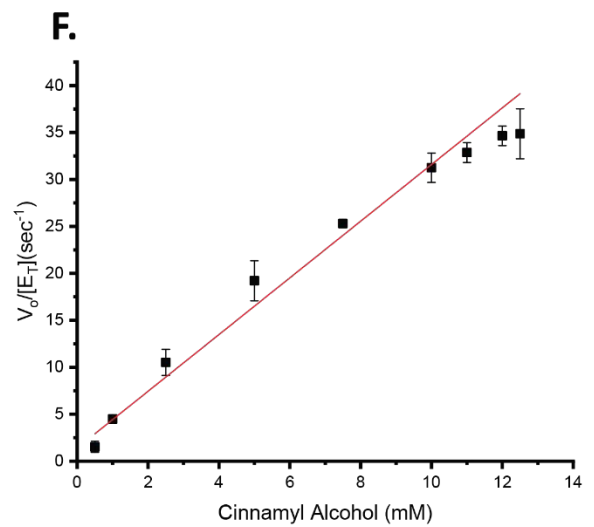

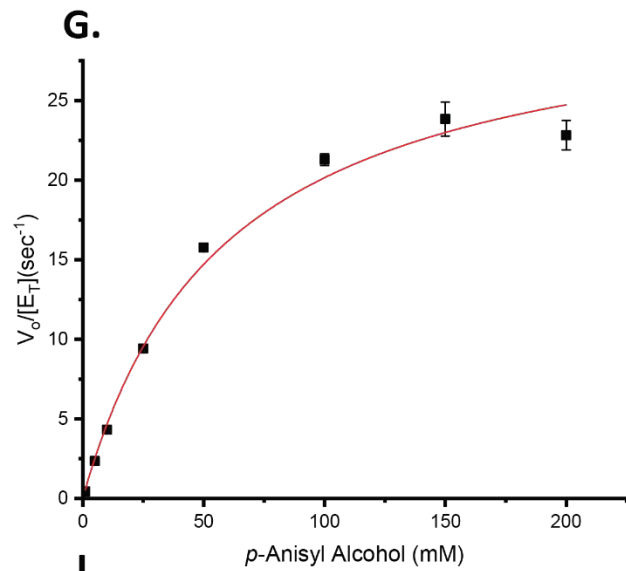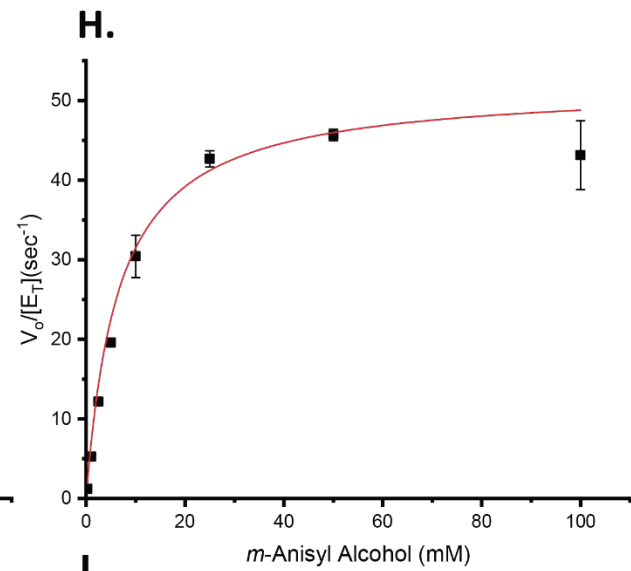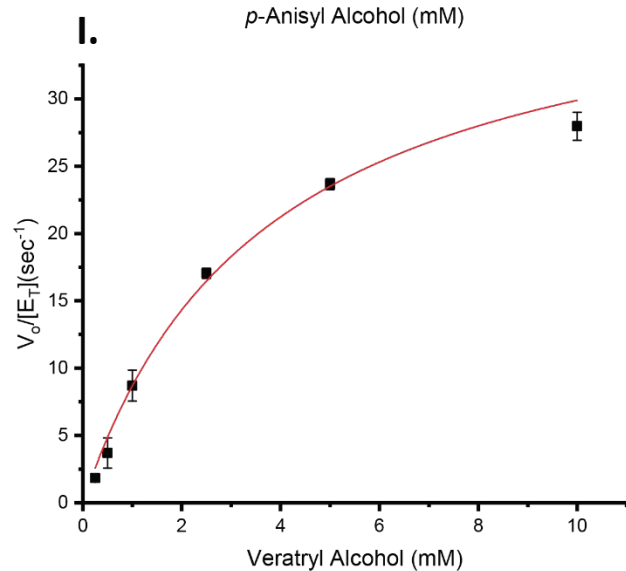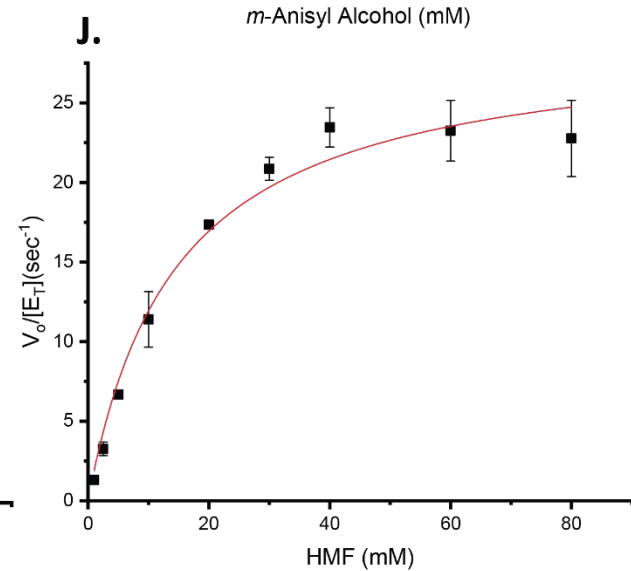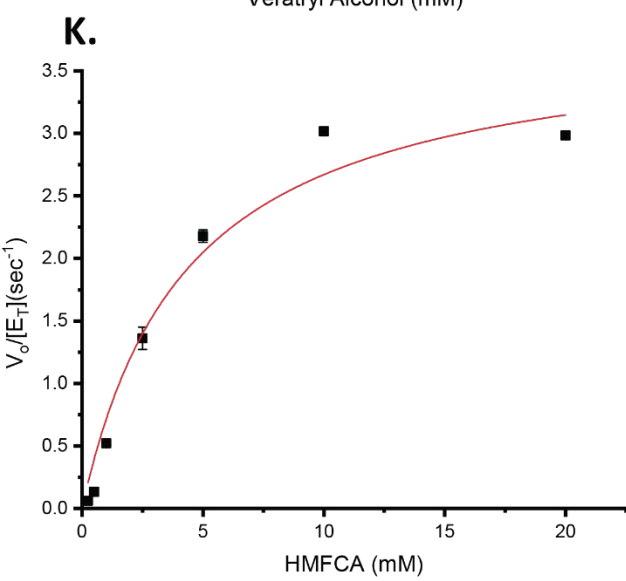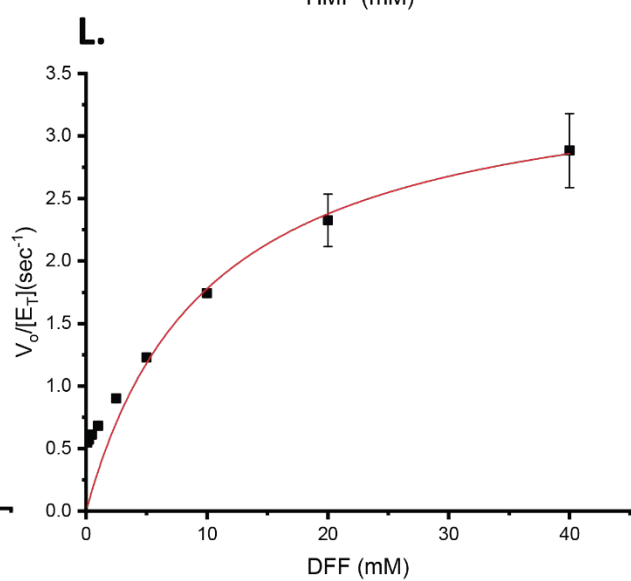

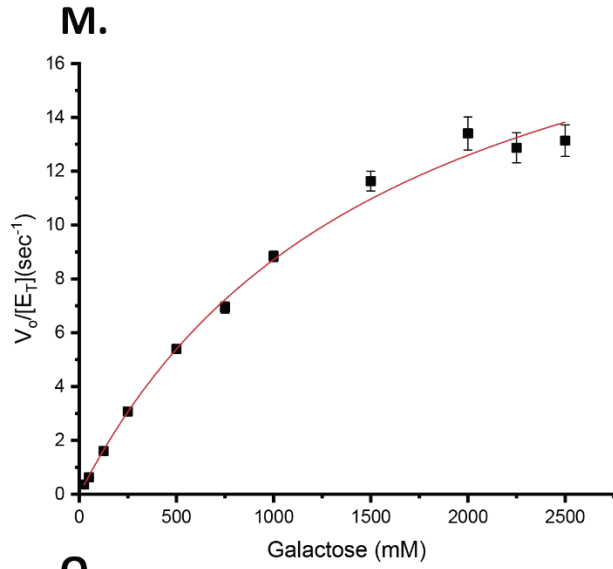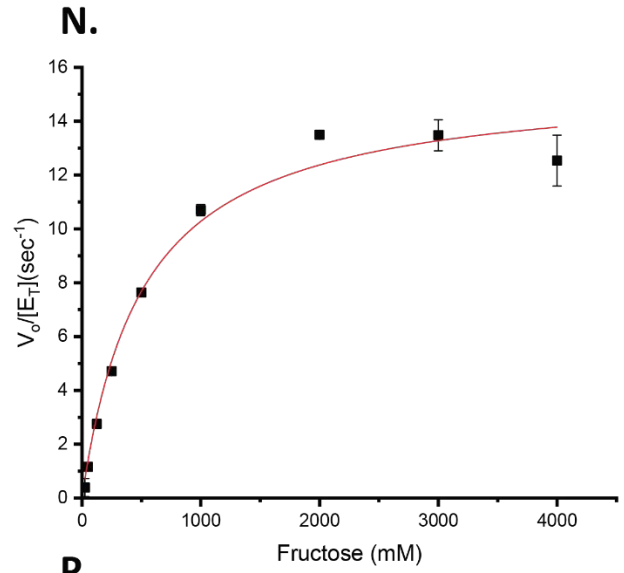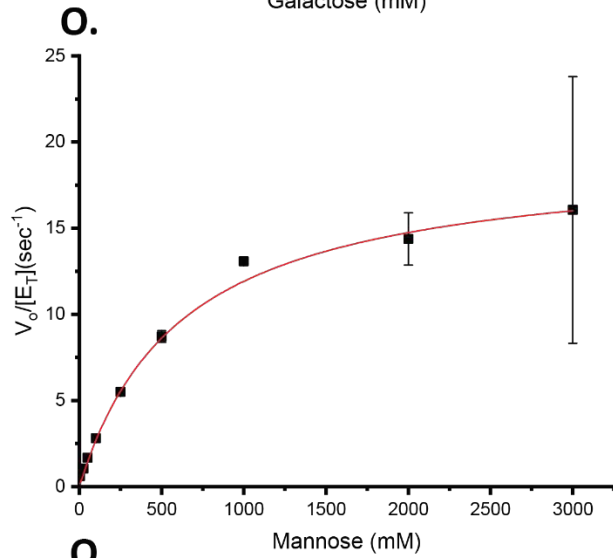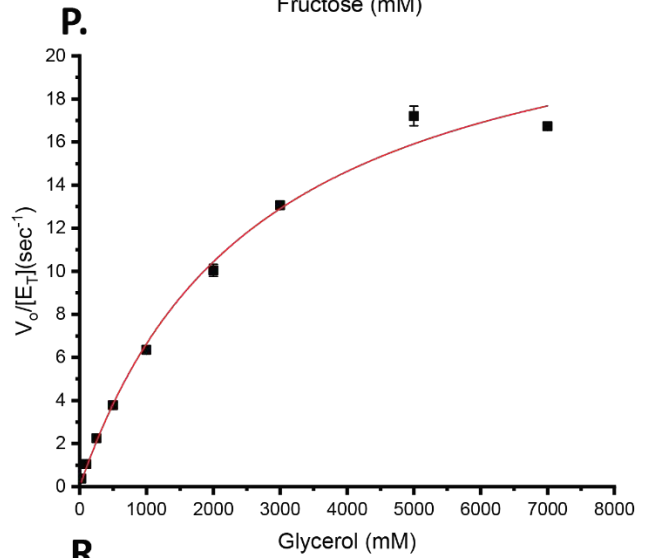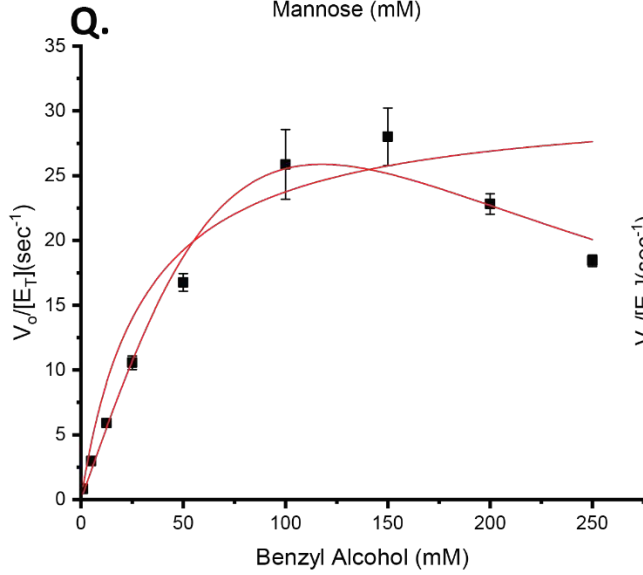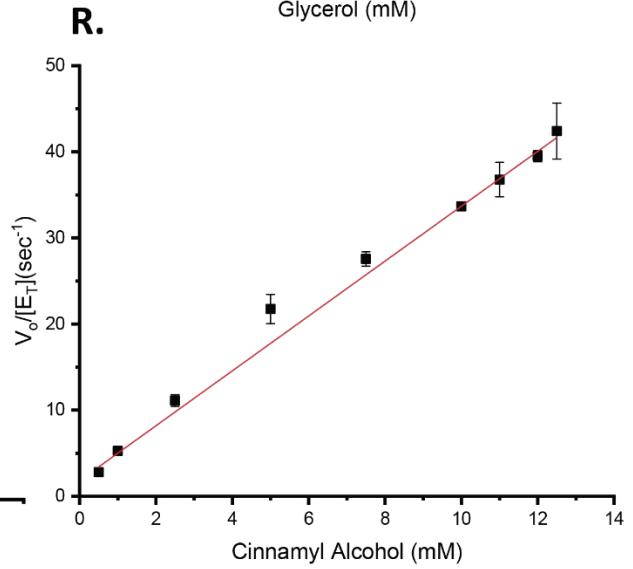

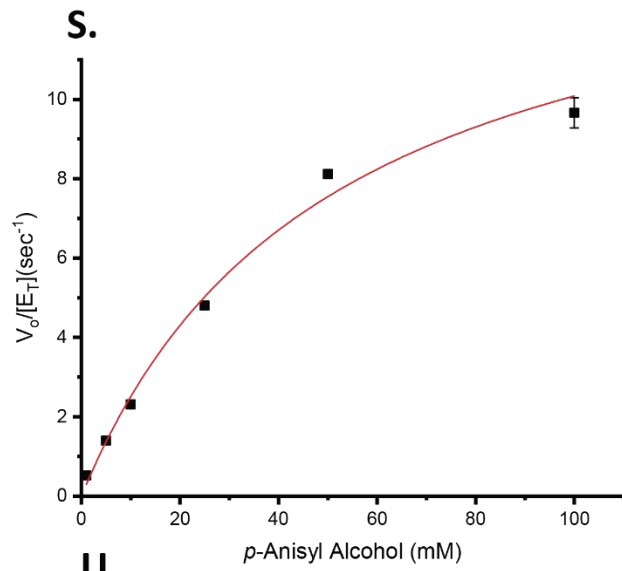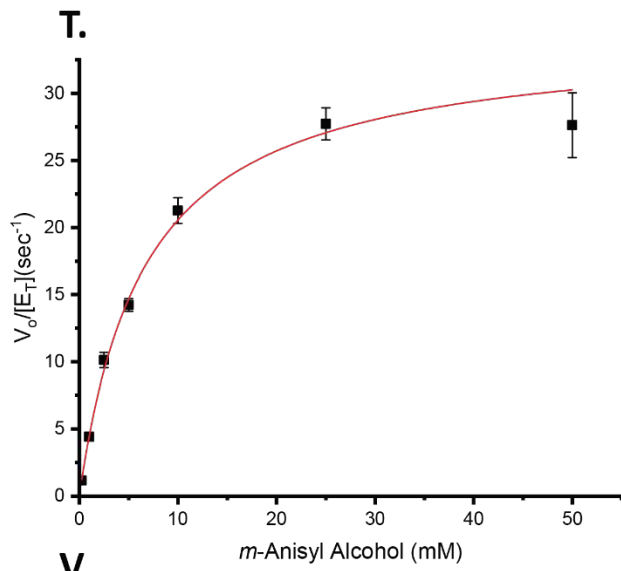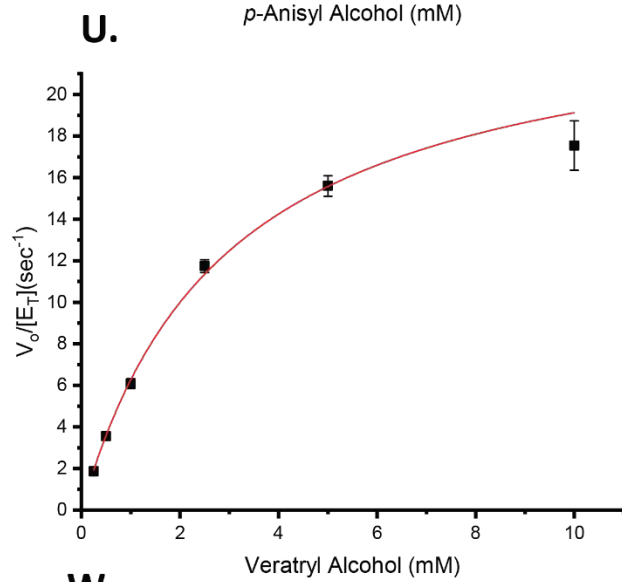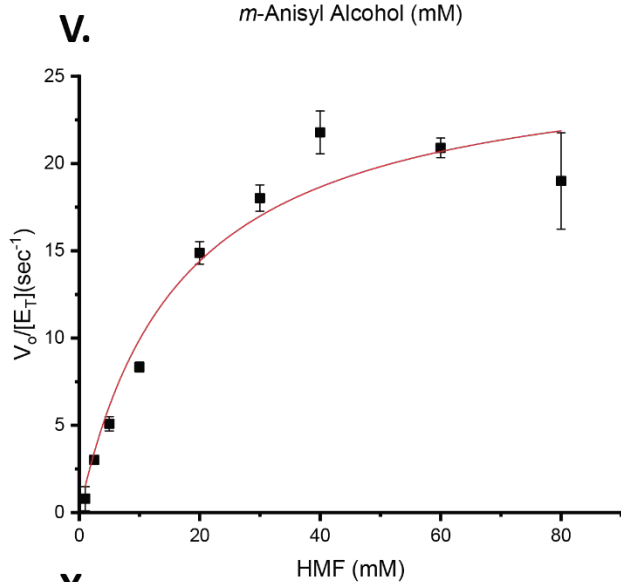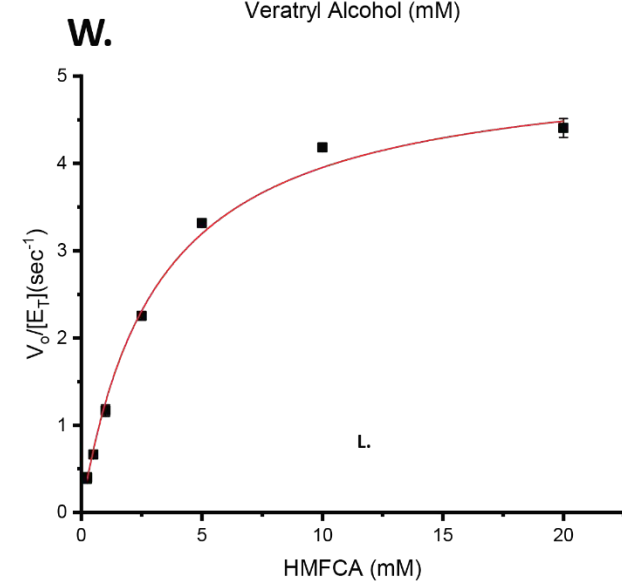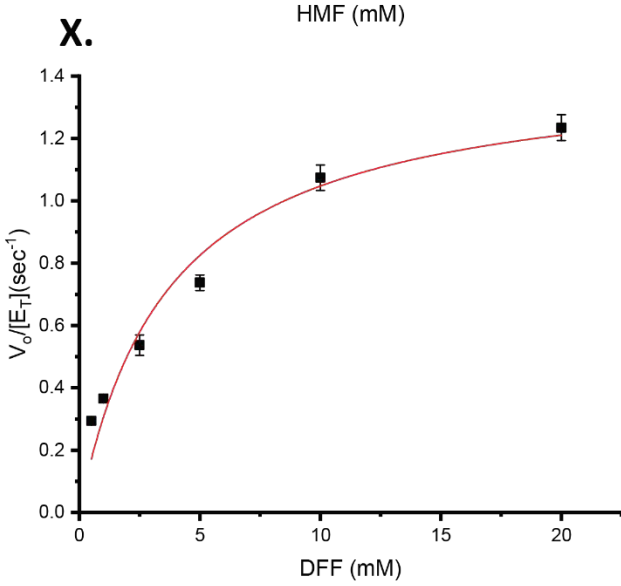

**Figure S6. Initial-rate kinetics.** Panels A-L: *Fgr*AAO, panels M-X: *Fox*AAO. Individual substrates are indicated in the x-axis labels. Values were measured in triplicate at each substrate concentration. Error bars represent the standard deviation from the mean values. The individual  $k_{\text{cat}}$  and  $K_{\text{M}}$  values were determined by performing a non-linear fitting analysis of the standard Michaelis-Menten equation to the data using OriginLab 9.55. For cinnamyl alcohol, which did not display saturation kinetics for either enzyme due to solubility limitations,  $k_{\text{cat}}/K_{\text{M}}$  values were obtained from the slope of linear fittings. Benzyl alcohol with *Fox*AAO (panel Q) displayed apparent substrate inhibition. The data was fit both with the classical Michaelis-Menten equation and the substrate inhibition variant,  $V_o/[E]_{\text{T}} = k_{\text{cat}}[S]/(K_{\text{M}} + [S] + [S]^2/K_{\text{is}})$ . Due to high errors on the individual constants  $k_{\text{cat}}$ ,  $K_{\text{M}}$ , and  $K_{\text{is}}$  in the latter case,  $k_{\text{cat}}$  and  $K_{\text{M}}$  values from the former are reported in Table 1.



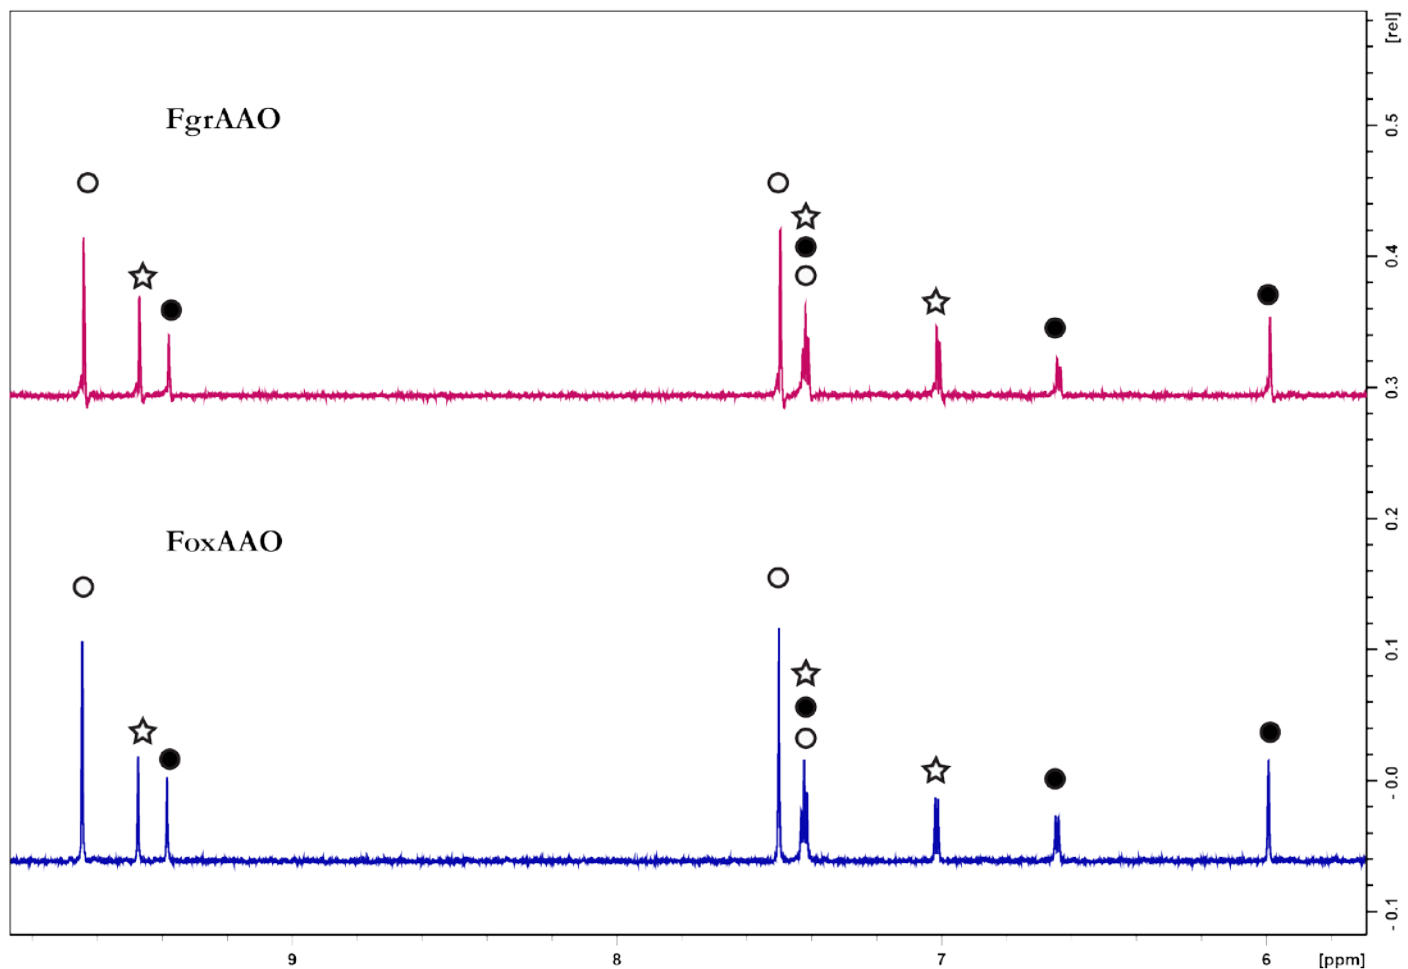

**Figure S7.**  $^1\text{H}$ -NMR analysis of the oxidation of HMF by *FgrAAO* and *FoxAAO*. A. *FgrAAO*; B. *FoxAAO*.  $^1\text{H}$  NMR spectra (400 MHz, 1:9  $\text{D}_2\text{O}$ :phosphate buffer, 50 mM, pH 7.5) of reaction product profiles after 16.5 h incubation with *FgrAAO* (top, pink) and *FoxAAO* (bottom, blue) in the presence of catalase and HRP for HMF at 10 mM showing full conversion to DFF (○) and the hydrated form, DFFhyd(●), as well as FFCA (★). See Figure 4 for full chemical structures.

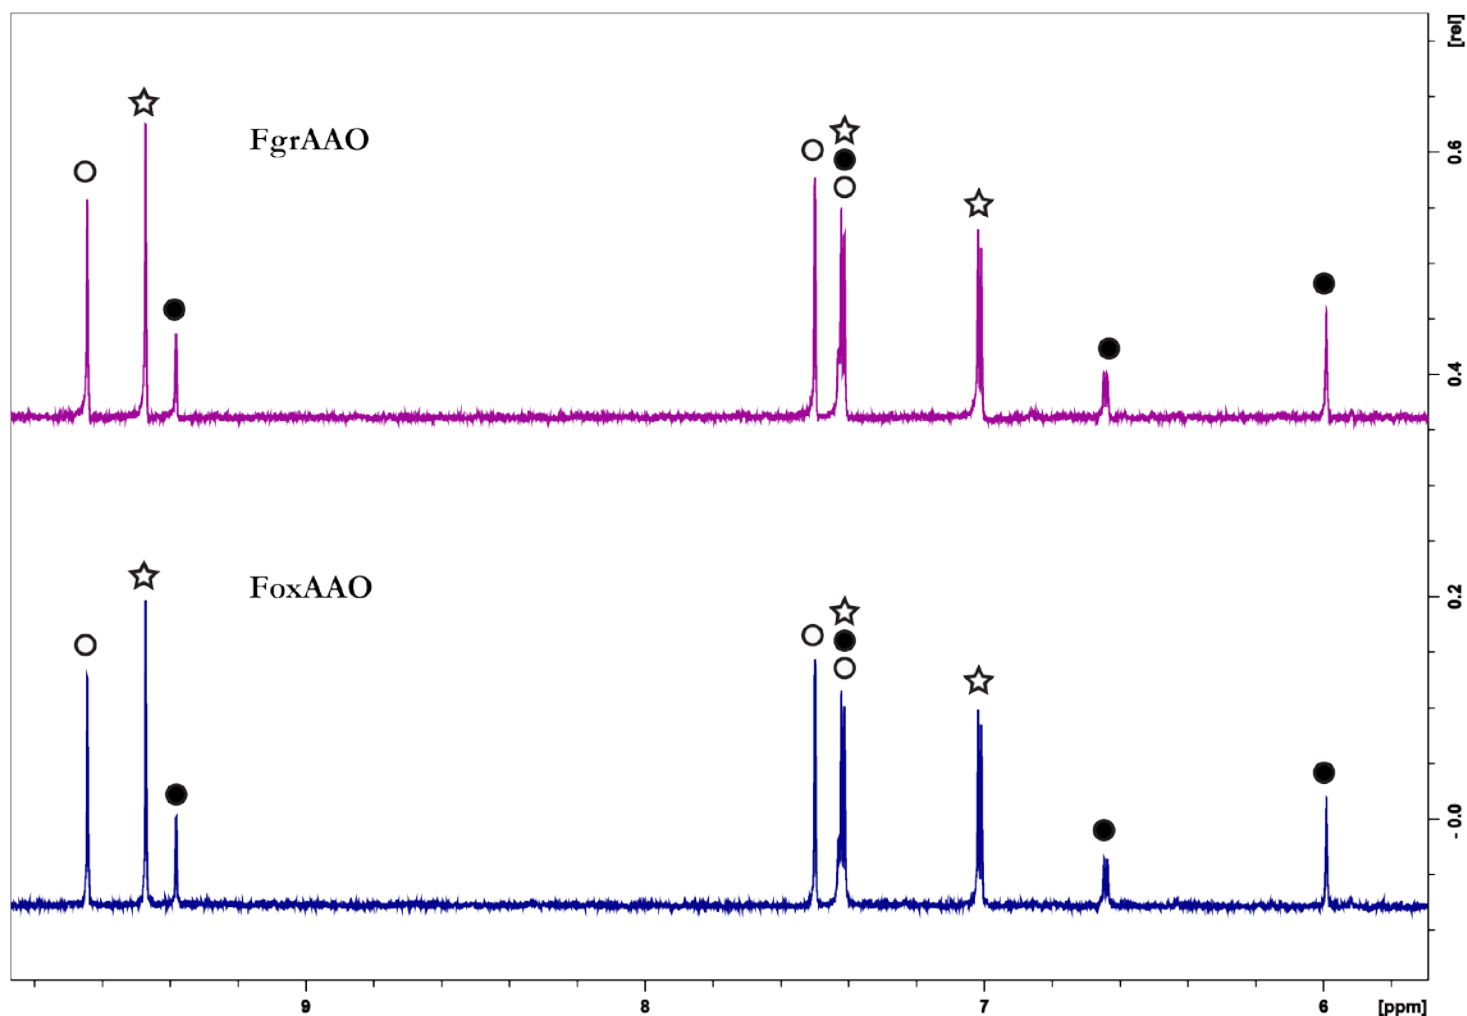

**Figure S8.**  $^1\text{H}$ -NMR analysis of the oxidation of DFF by *FgrAAO* and *FoxAAO*. A. *FgrAAO*; B. *FoxAAO*.  $^1\text{H}$  NMR spectra (400 MHz, 1:9  $\text{D}_2\text{O}$ :phosphate buffer, 50 mM, pH 7.5) of reaction product profiles after 16.5 h incubation with *FgrAAO* (top, pink) and *FoxAAO* (bottom, blue) in the presence of catalase and HRP for DFF (○ and ●) at 10 mM showing partial conversion to FFCA (★). See Figure 4 for full chemical structures.

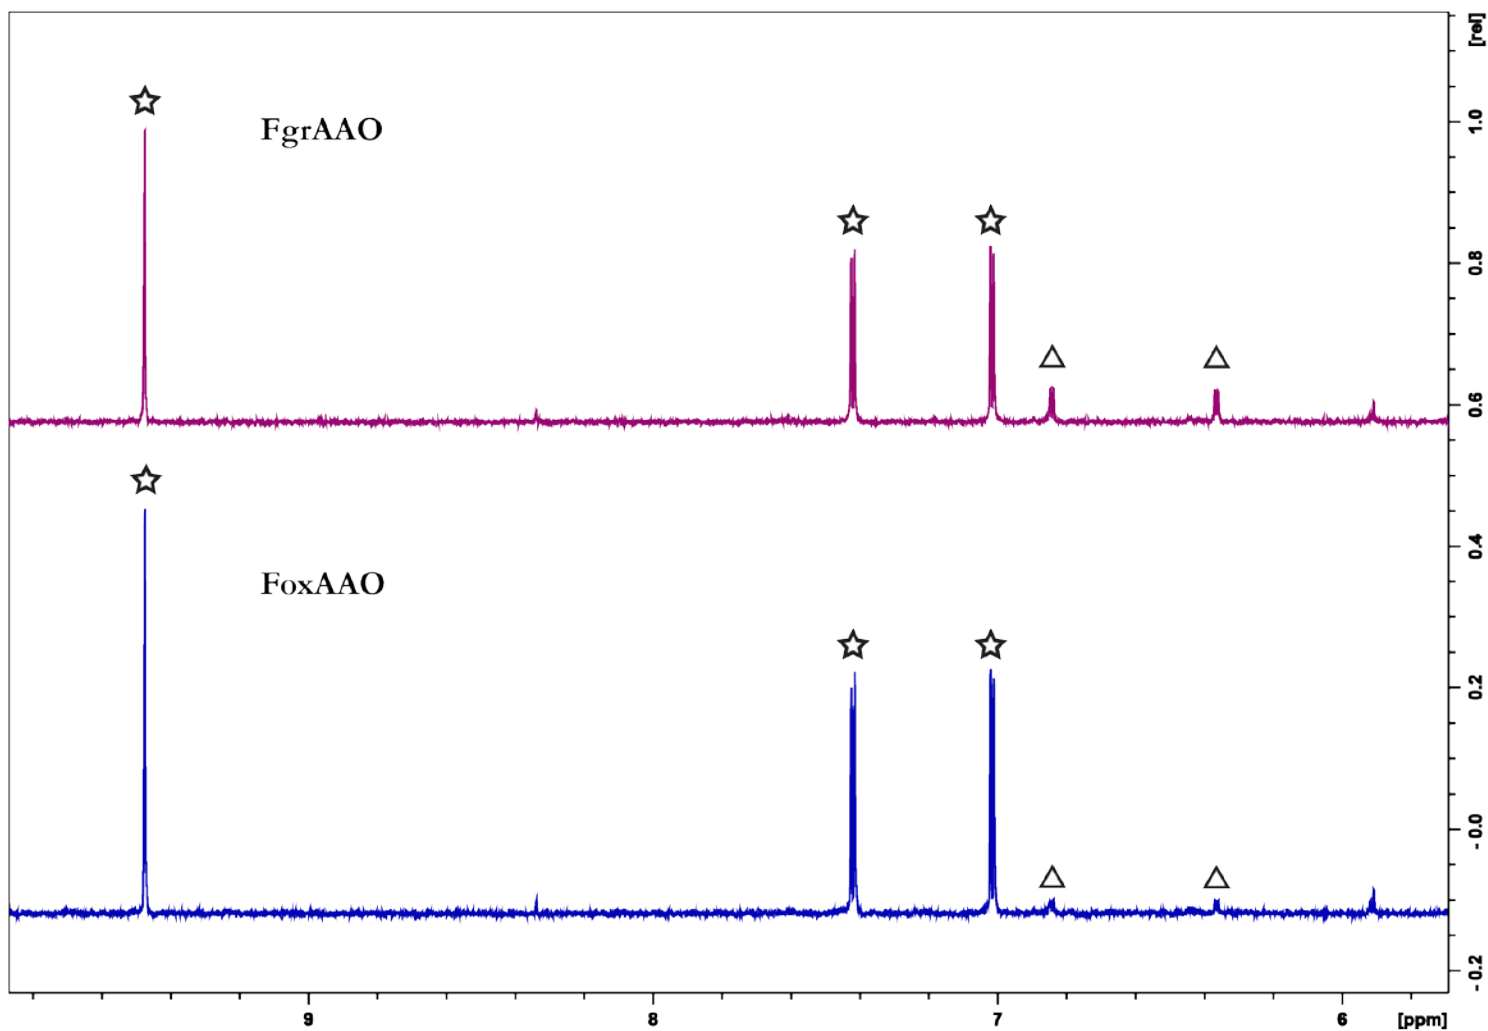

**Figure S9.**  $^1\text{H}$ -NMR analysis of the oxidation of HMFCA by *FgrAAO* and *FoxAAO*. A. *FgrAAO*; B. *FoxAAO*.  $^1\text{H}$  NMR spectra (400 MHz, 1:9 D<sub>2</sub>O:phosphate buffer, 50 mM, pH 7.5) of reaction product profiles after 16.5 h incubation with *FgrAAO* (top, pink) and *FoxAAO* (bottom, blue) in the presence of catalase and HRP for HMFCA ( $\Delta$ ) at 10 mM showing almost full conversion to FFCA ( $\star$ ). See Figure 4 for full chemical structures.

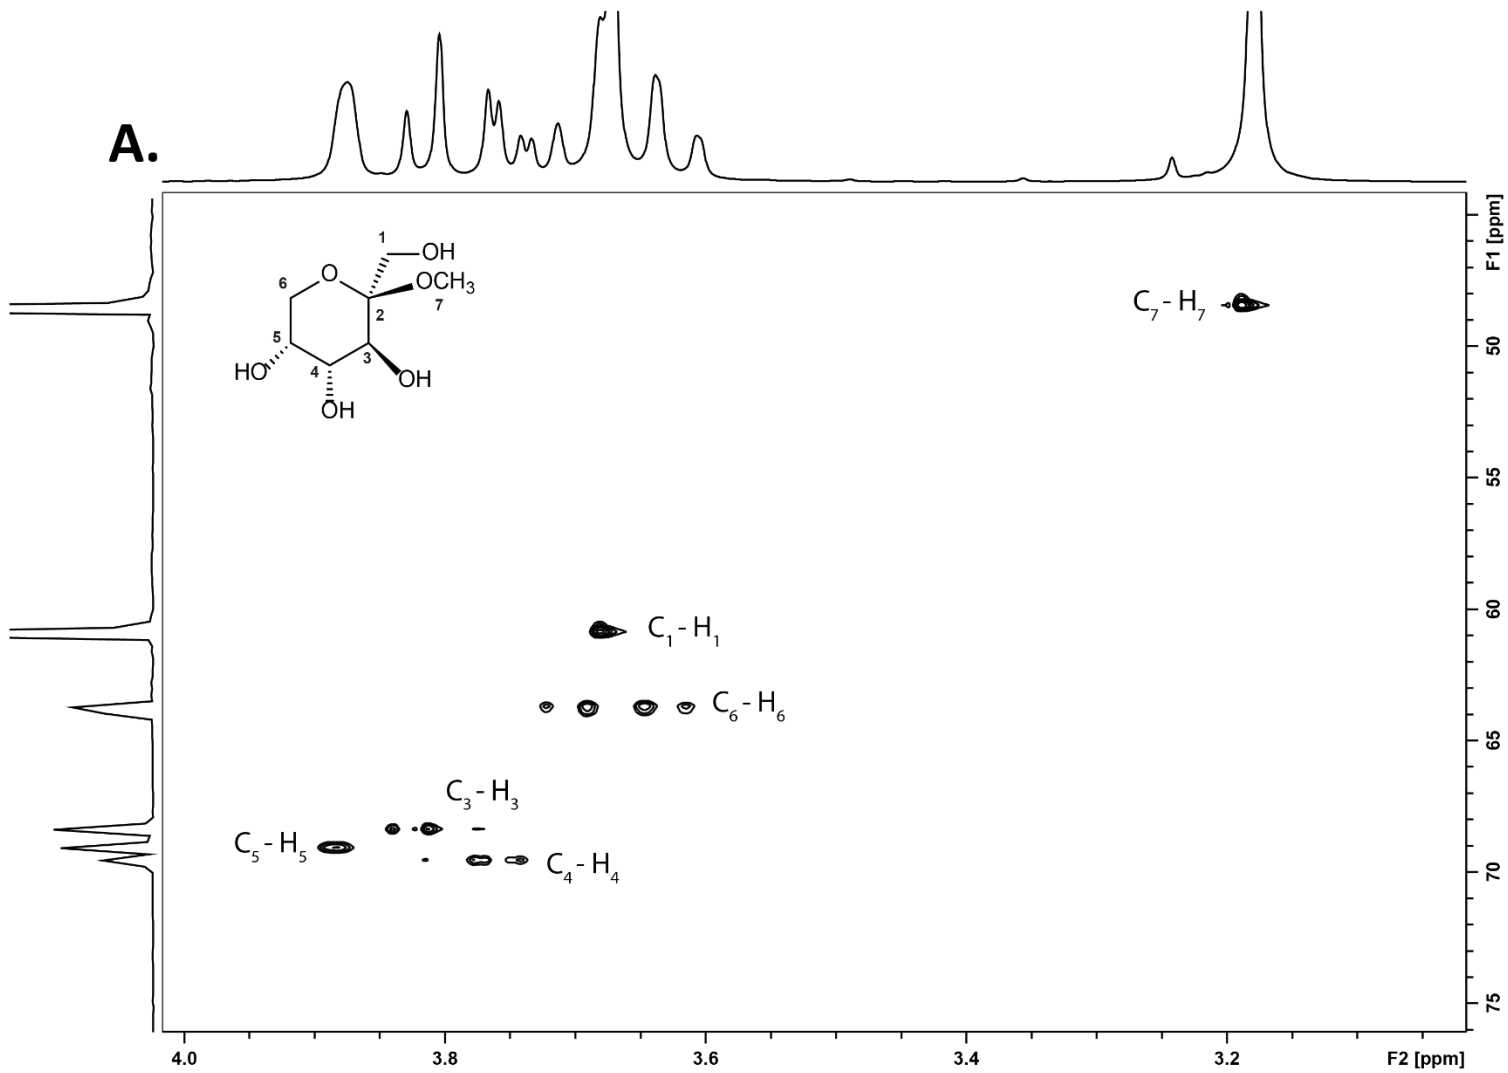

**B.**

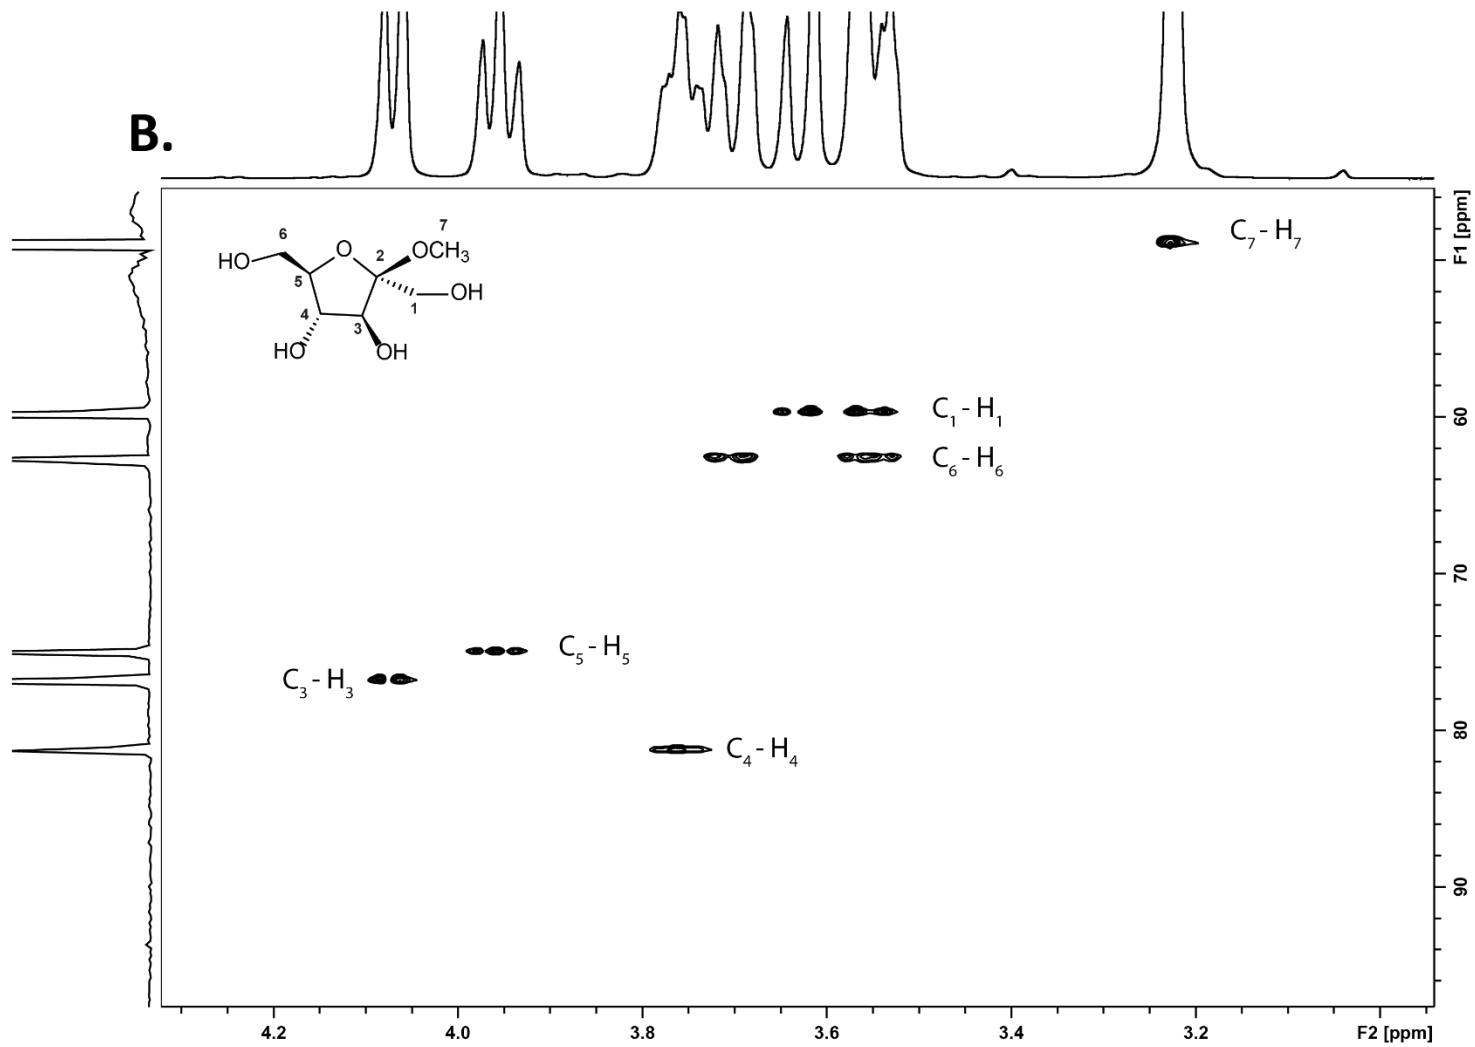

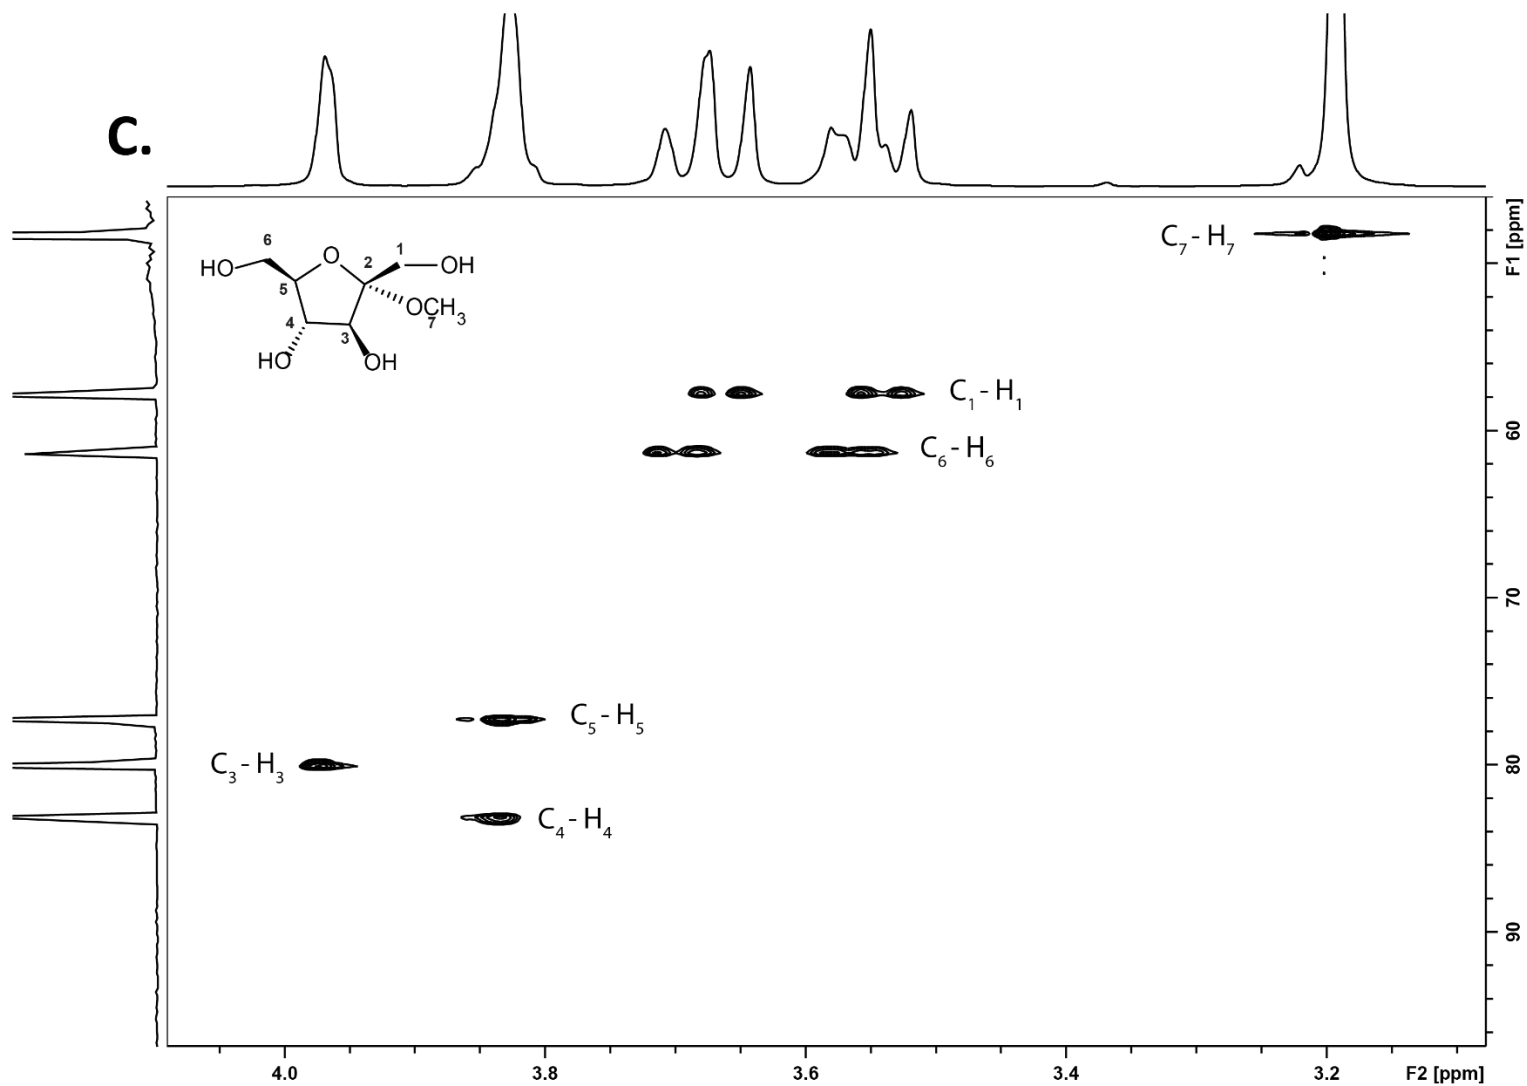

**Figure S10. Complete assignment of proton and carbon nuclei from  $^1\text{H}$ ,  $^{13}\text{C}$  HSQC of fructose derivatives. A. Methyl  $\beta$ -D-fructopyranoside. B. Methyl  $\beta$ -D-fructofuranoside. C. Methyl  $\alpha$ -D-fructofuranoside. Each black crosspeak corresponds to a  $^1\text{J}_{\text{C,H}}$ -coupling interaction from the HSQC experiment.**

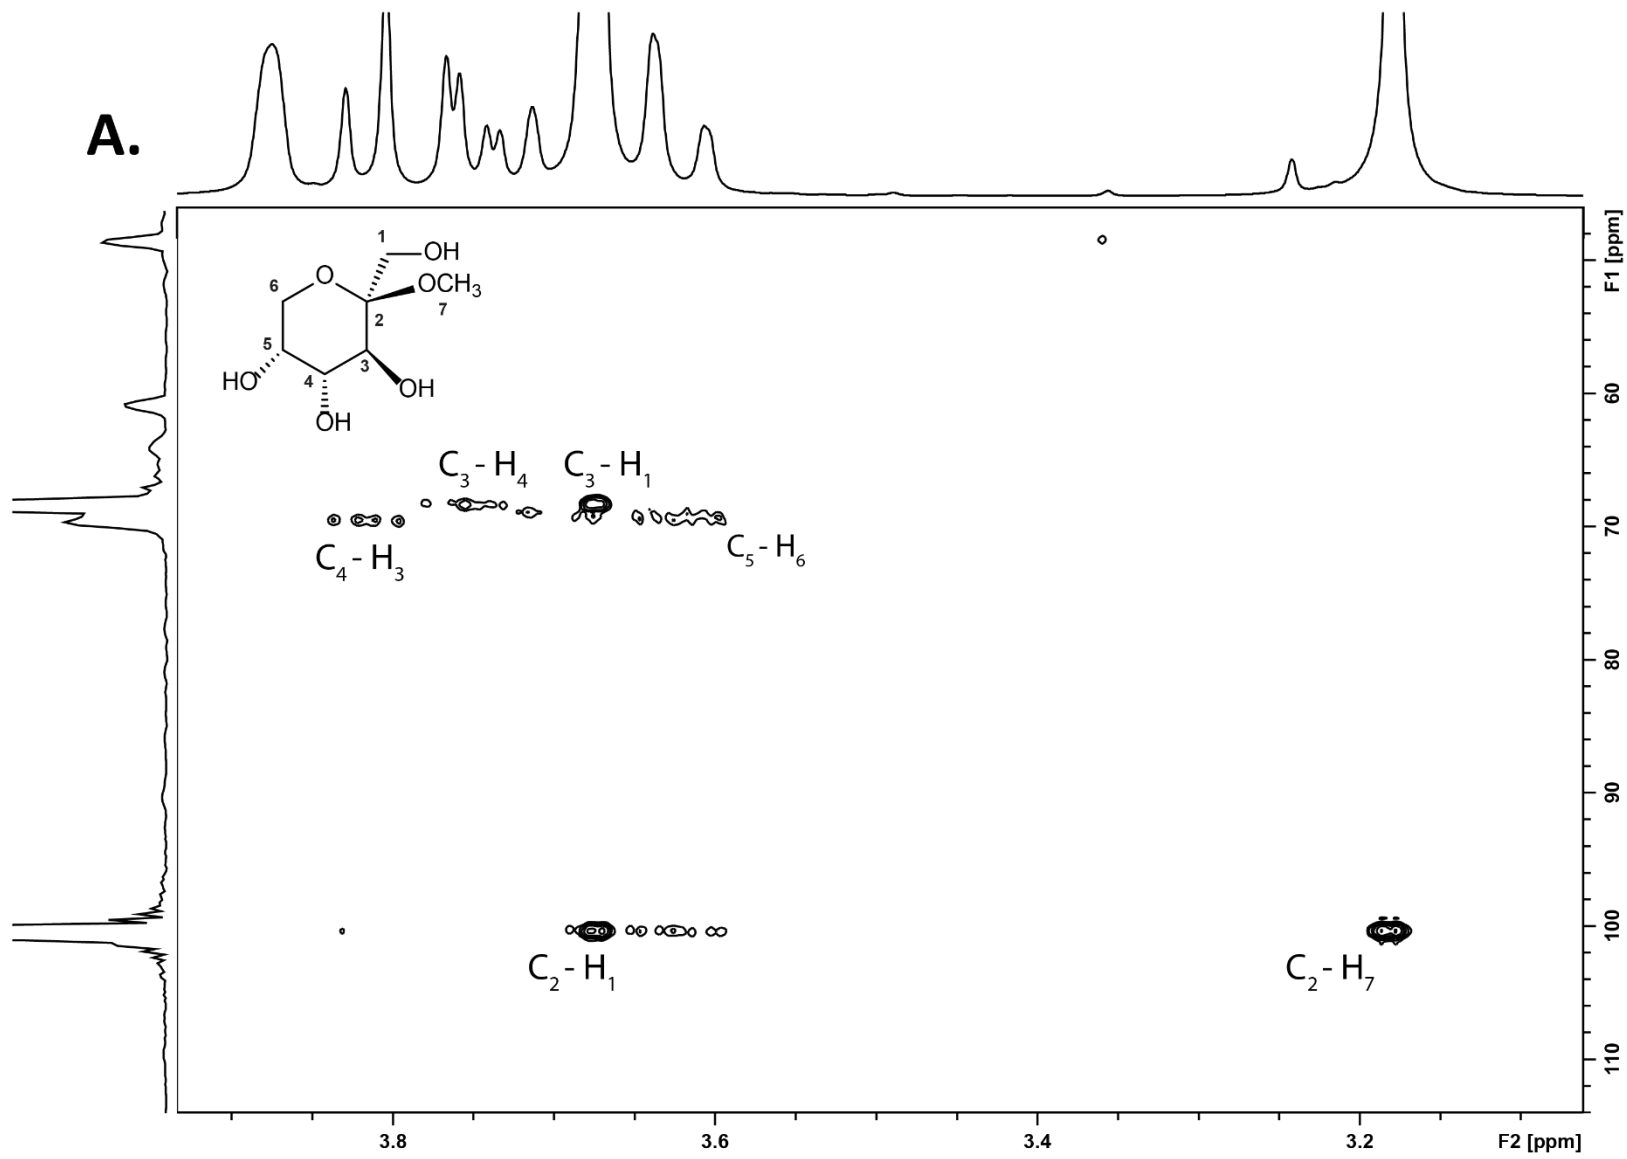

**B.**

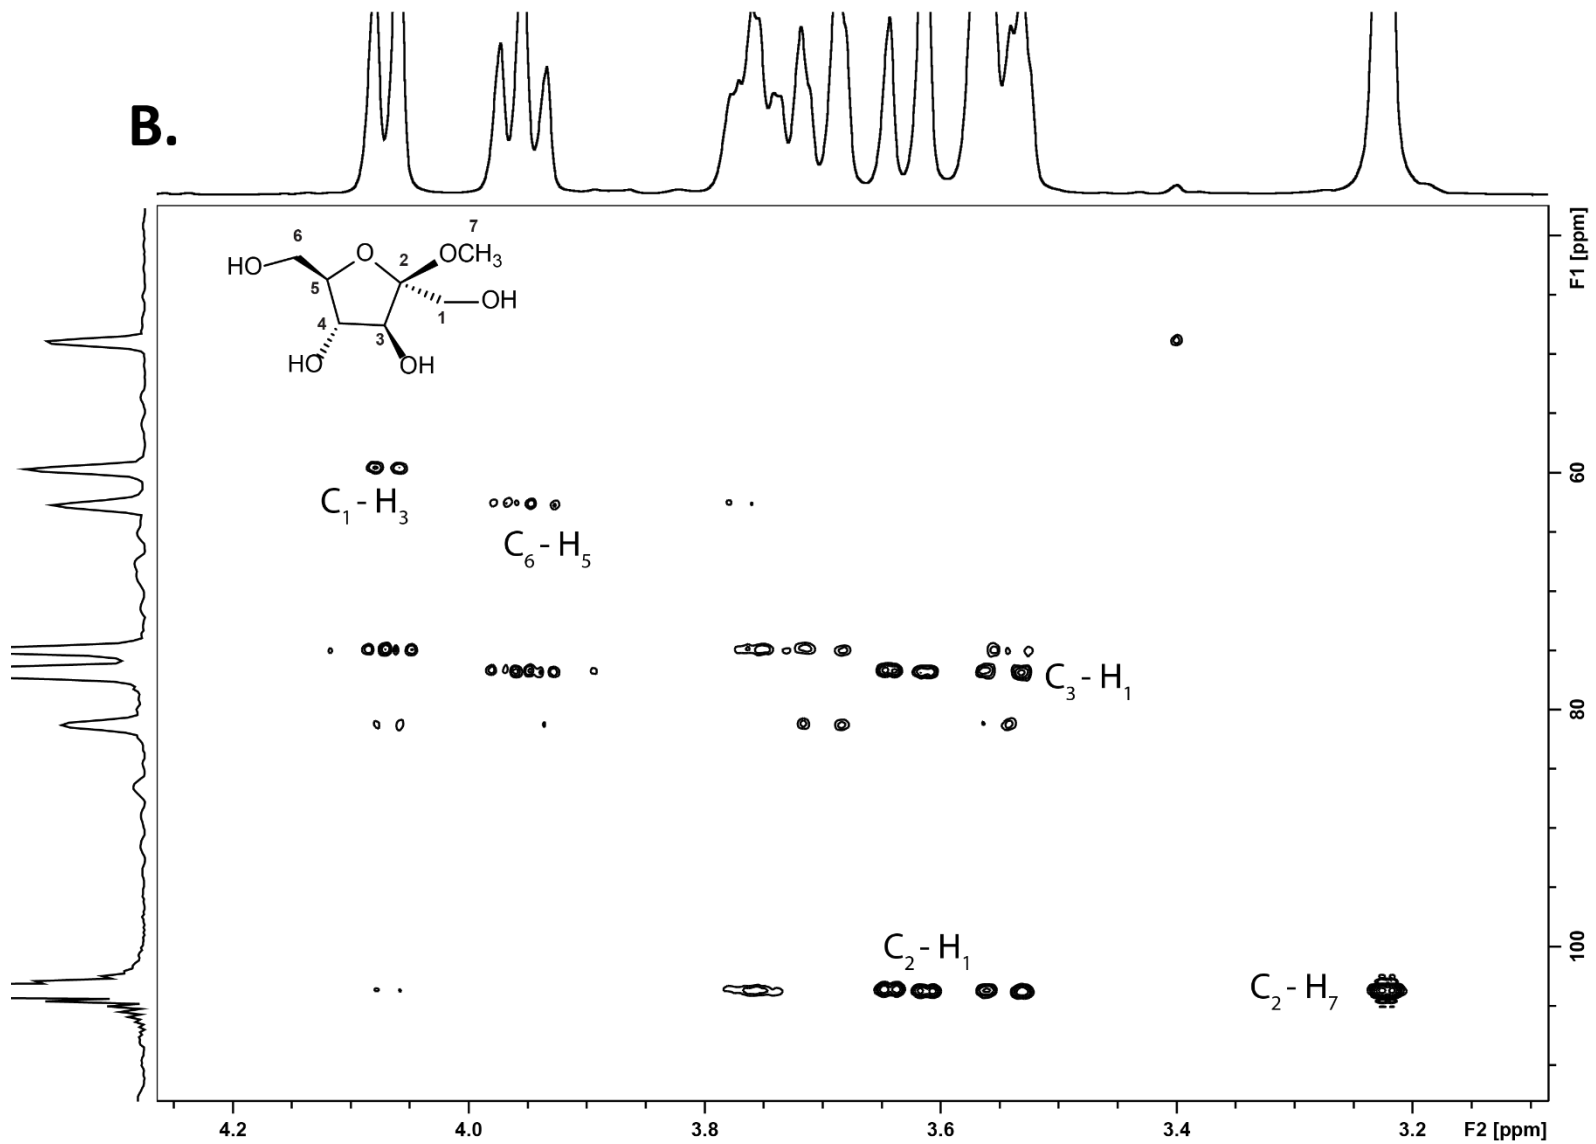



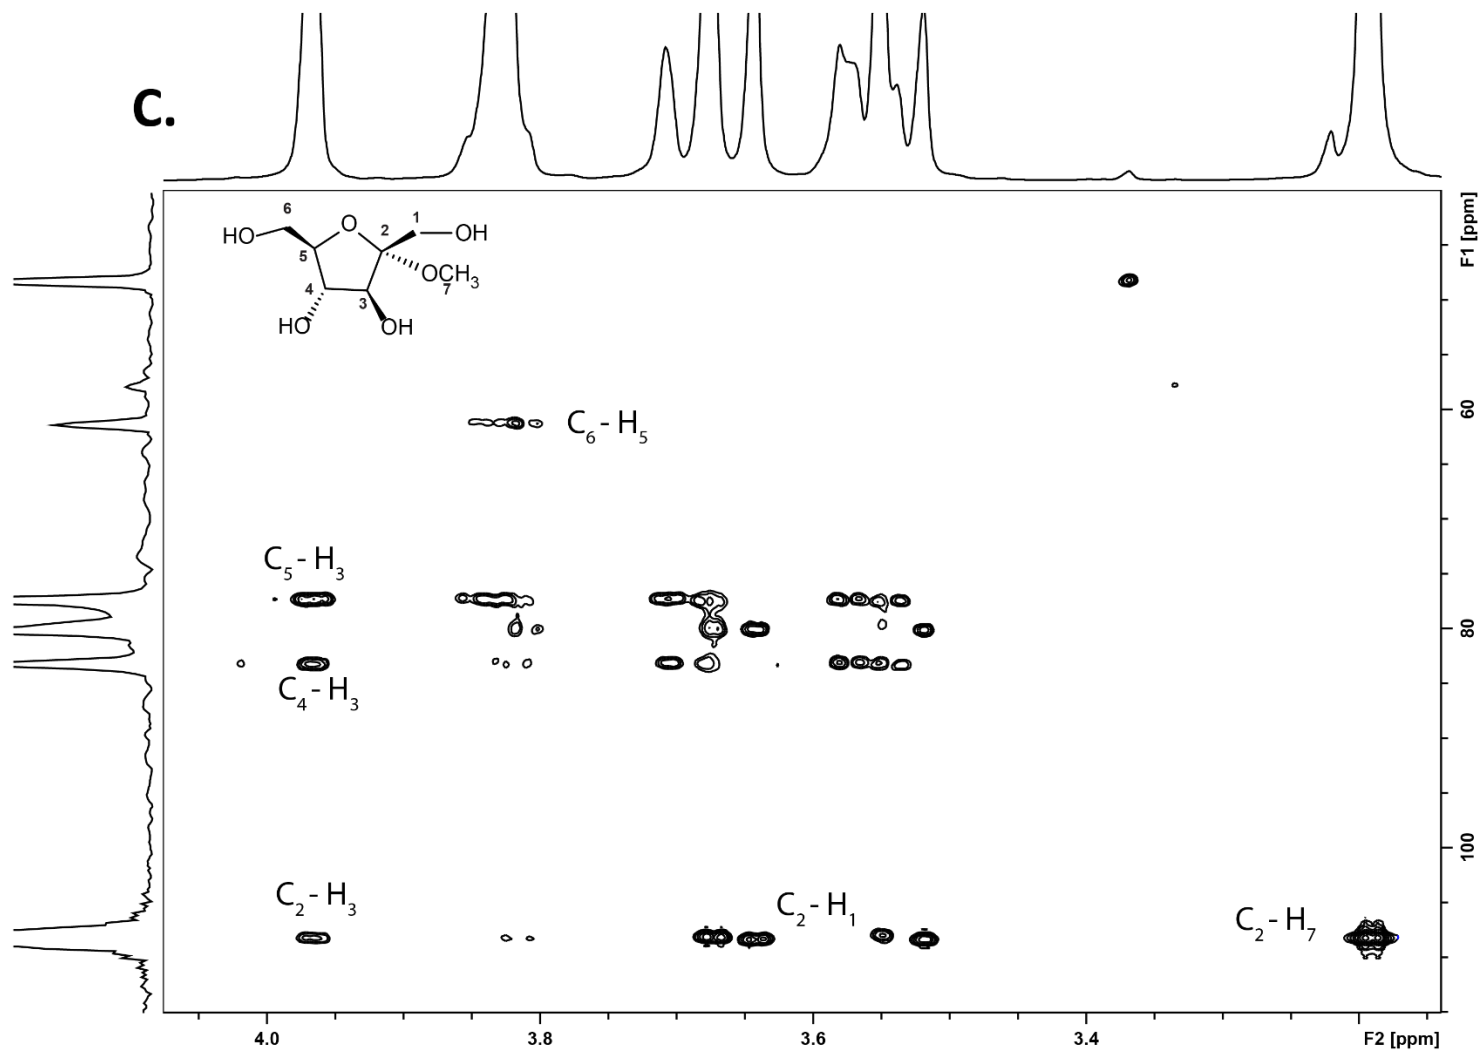

**Figure S11. Selective assignment of proton and carbon nuclei from  $^1\text{H}$ ,  $^{13}\text{C}$  HMBC of fructose derivatives.** A. Methyl  $\beta$ -D-fructopyranoside. B. Methyl  $\beta$ -D-fructofuranoside. C. Methyl  $\alpha$ -D-fructofuranoside. Each black crosspeak corresponds to a  $^2\text{J}_{\text{C,H}}$ - or  $^3\text{J}_{\text{C,H}}$ -coupling interaction from the HMBC experiment.

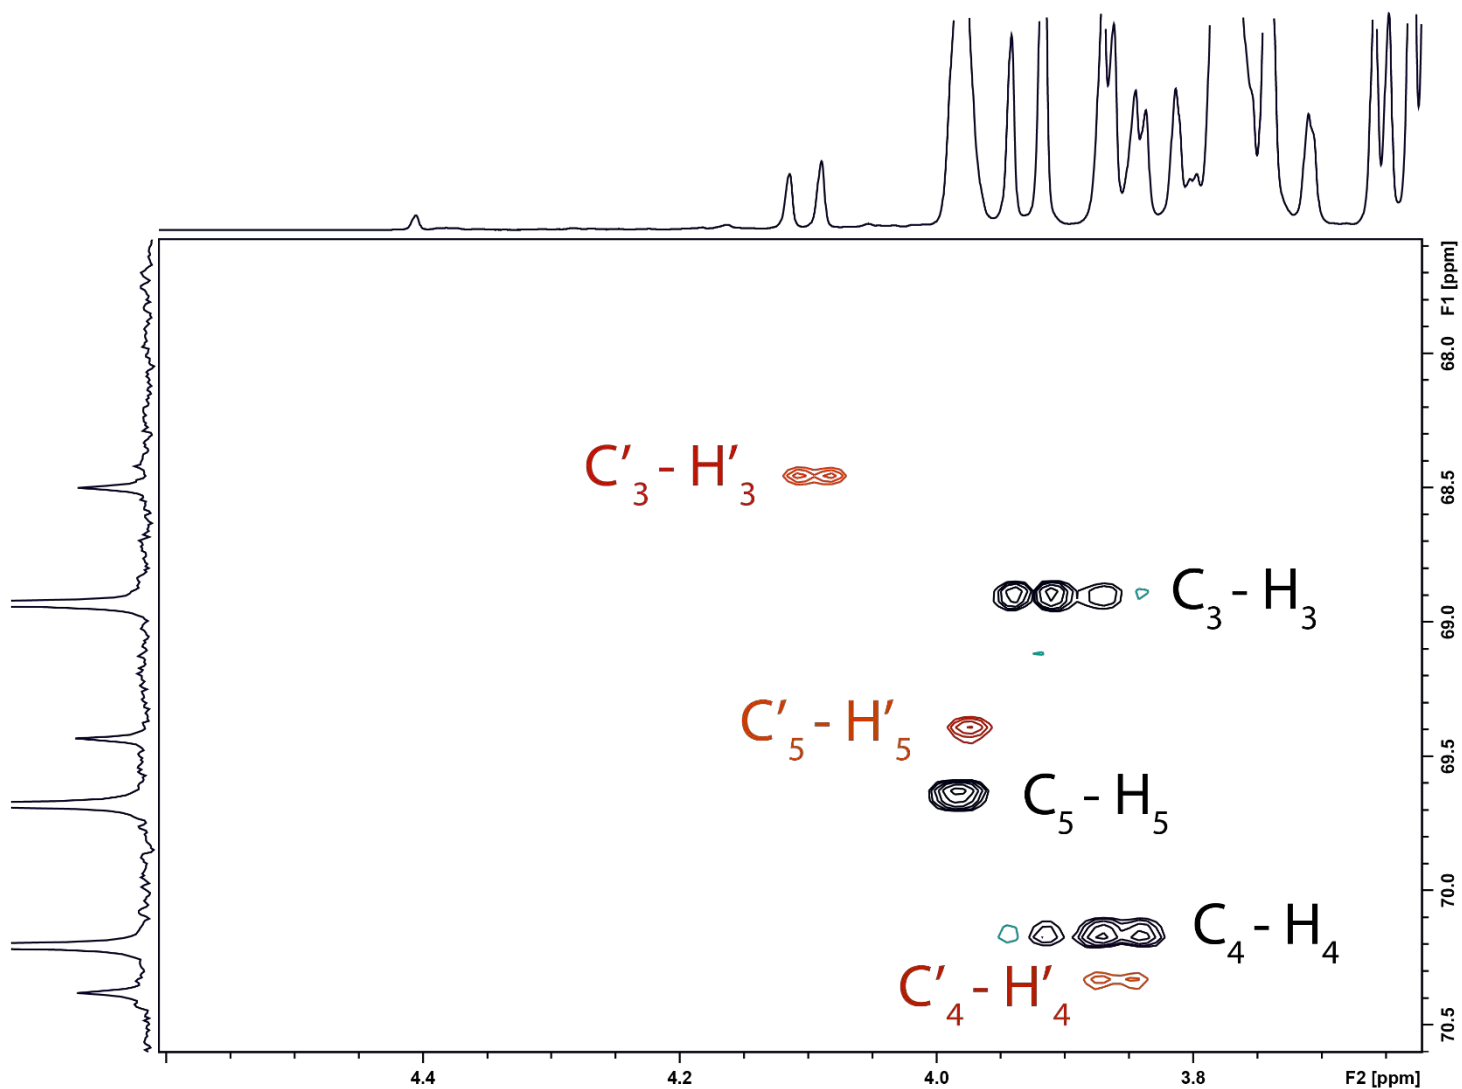

**Figure S12.** Complete analysis of oxidation reaction components of *FgrAAO* of methyl  $\beta$ -D-fructopyranose from  $^1\text{H}$ ,  $^{13}\text{C}$  HSQC zoomed into 3.6-4.6 ppm region. Each black crosspeak corresponds to a  $^1\text{J}_{\text{C,H}}$ -coupling interaction from the HSQC experiment.

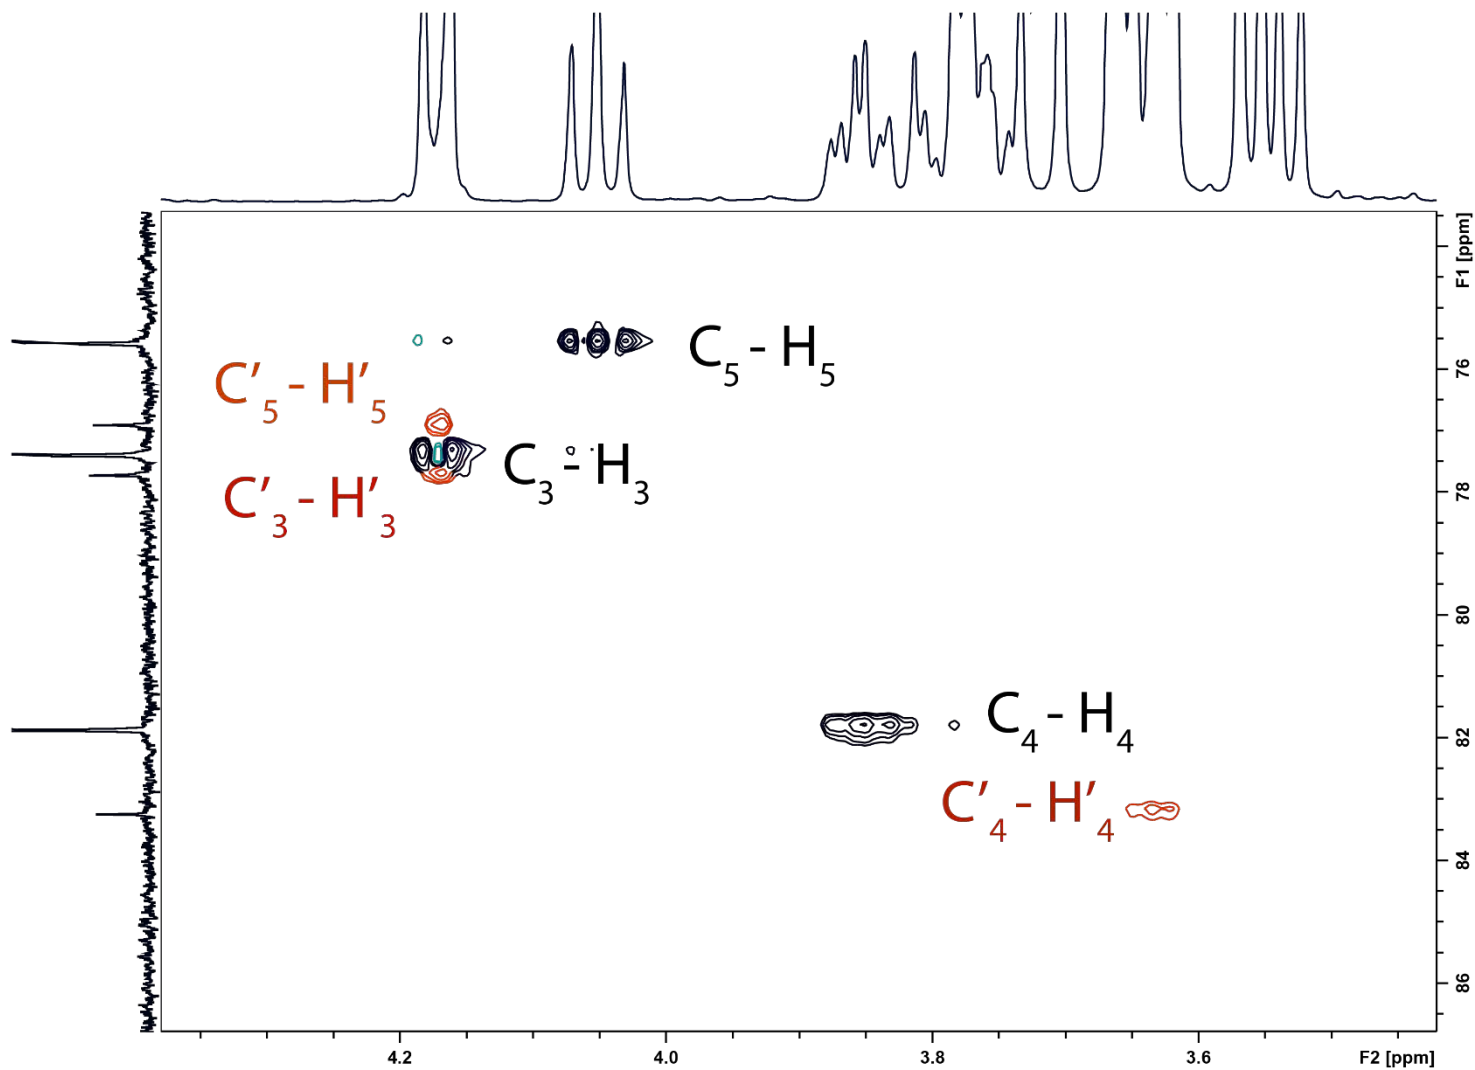

Figure S13. Complete analysis of oxidation reaction components of *Fgr*AAO of methyl  $\beta$ -D-fructofuranose from  $^1\text{H}$ ,  $^{13}\text{C}$  HSQC zoomed into 3.6-4.6 ppm region. Each black crosspeak corresponds to a  $^1\text{J}_{\text{C,H}}$ -coupling interaction from the HSQC experiment.

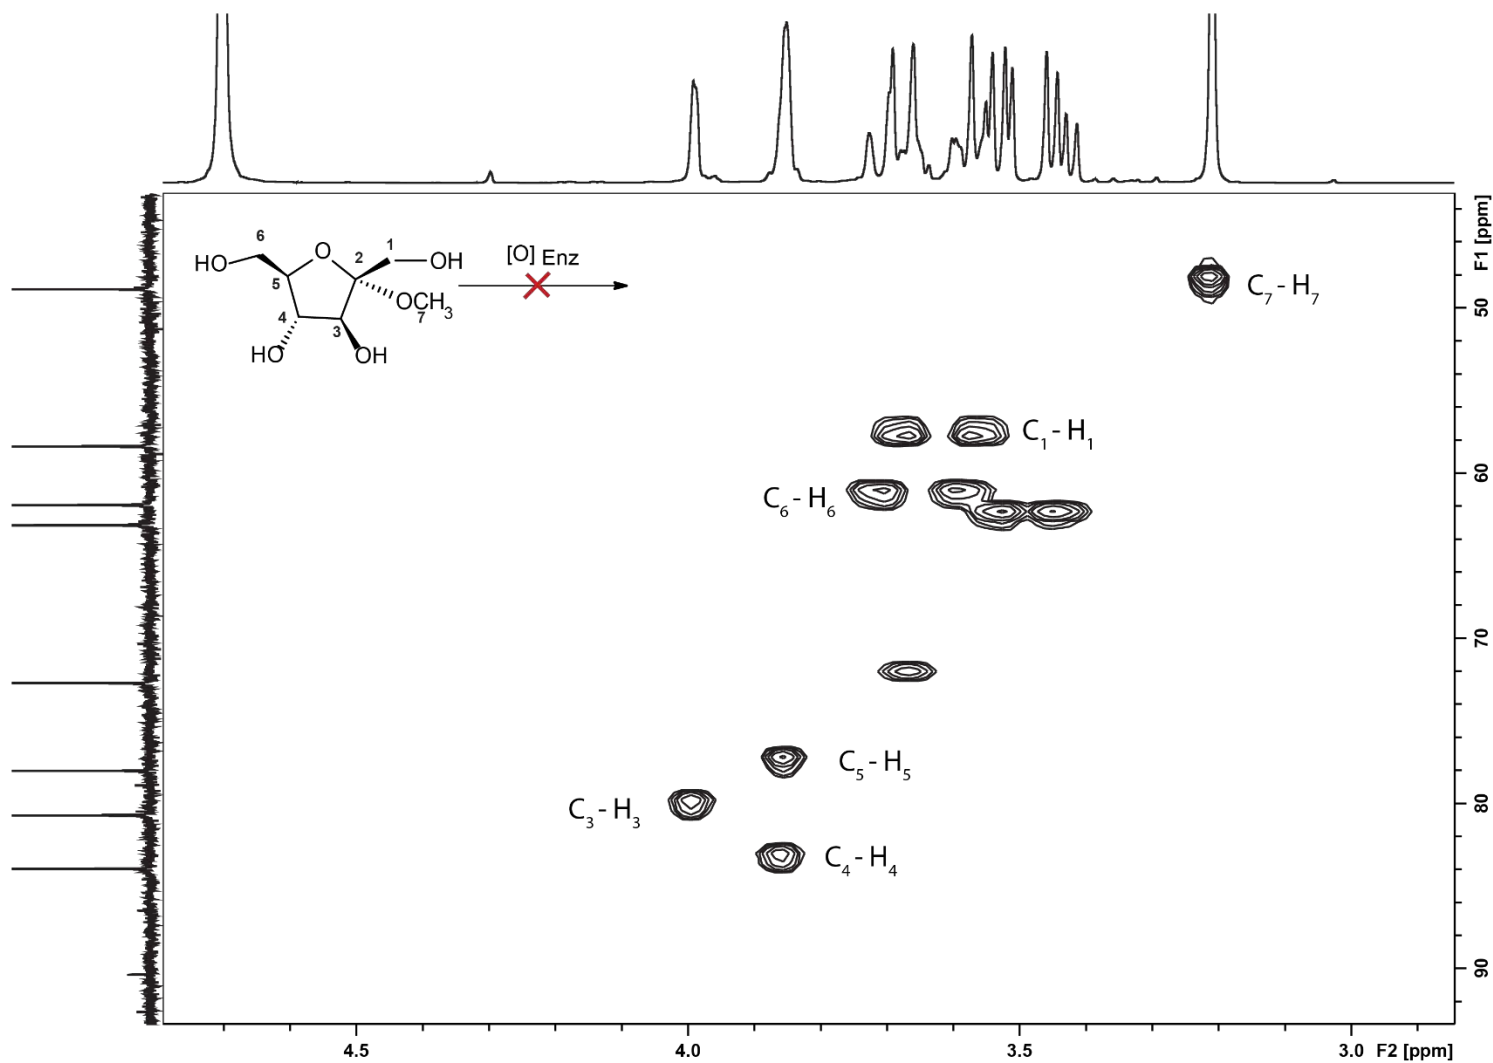

**Figure S14. Complete analysis of oxidation reaction components of *FgrAAO* of methyl  $\alpha$ -D-fructofuranoside from  $^1\text{H}$ ,  $^{13}\text{C}$  HSQC.** Each black crosspeak corresponds to a  $^1\text{J}_{\text{C,H}}$ -coupling interaction from the HSQC experiment. Two carbon peaks at 63.1 ppm and 72.7 ppm have been attributed to an impurity that is present in either the HRP, catalase or buffer solutions.

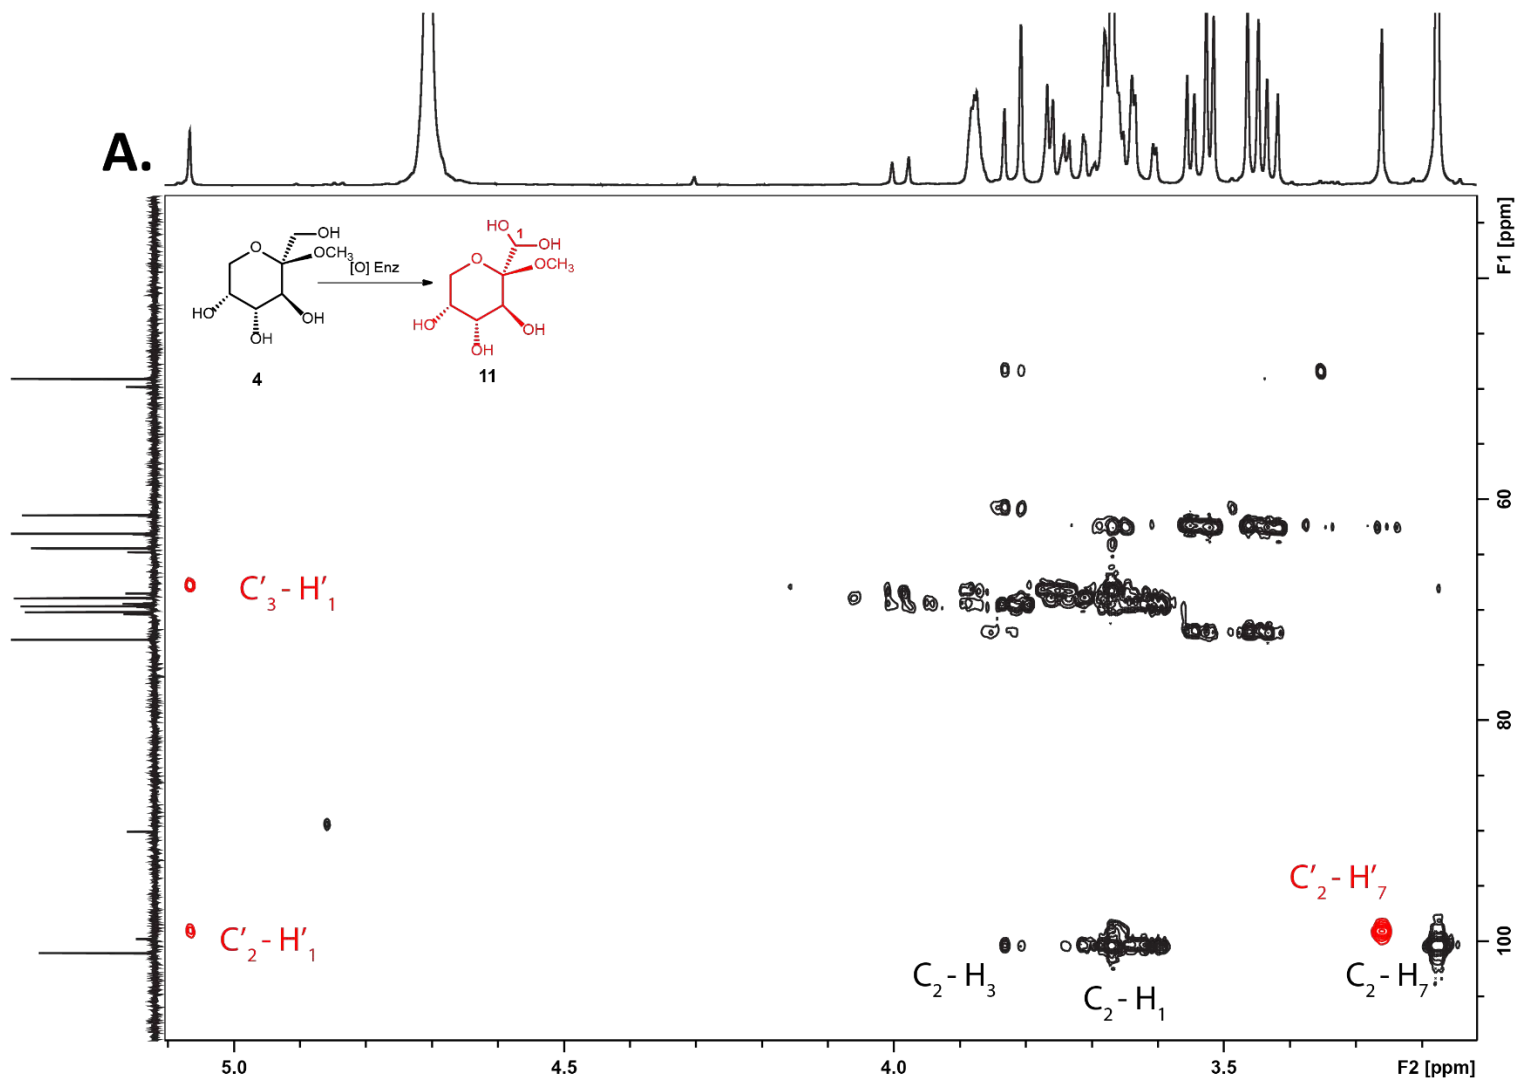

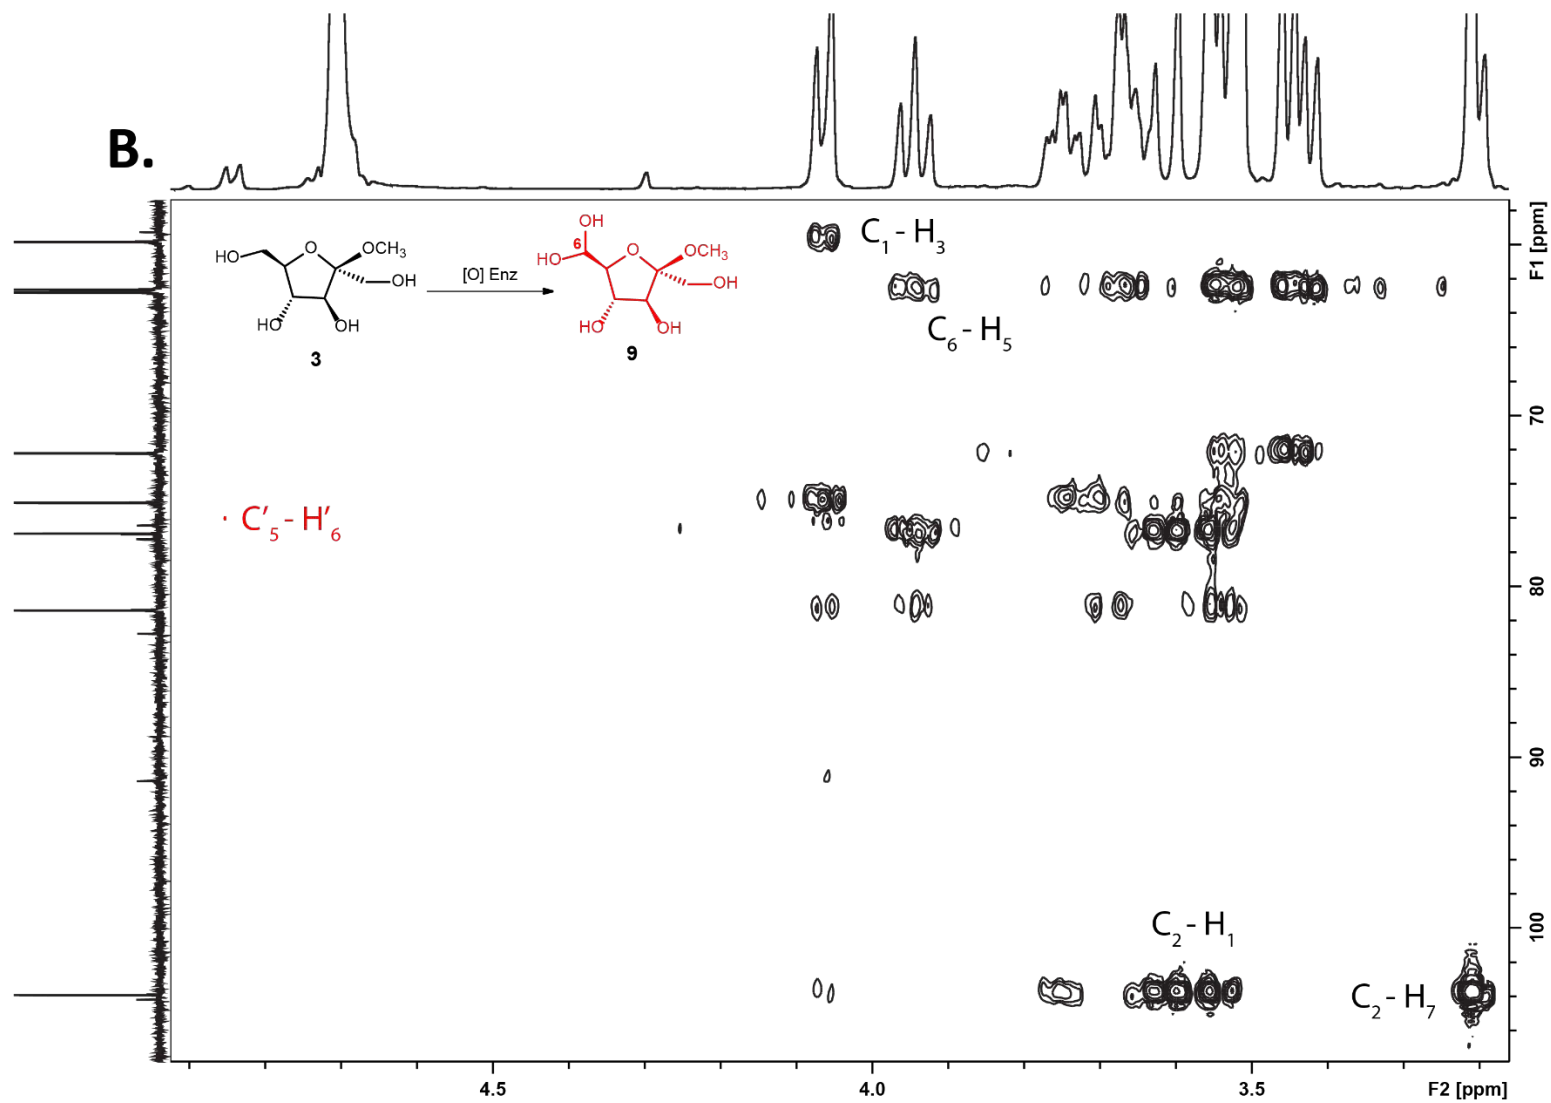

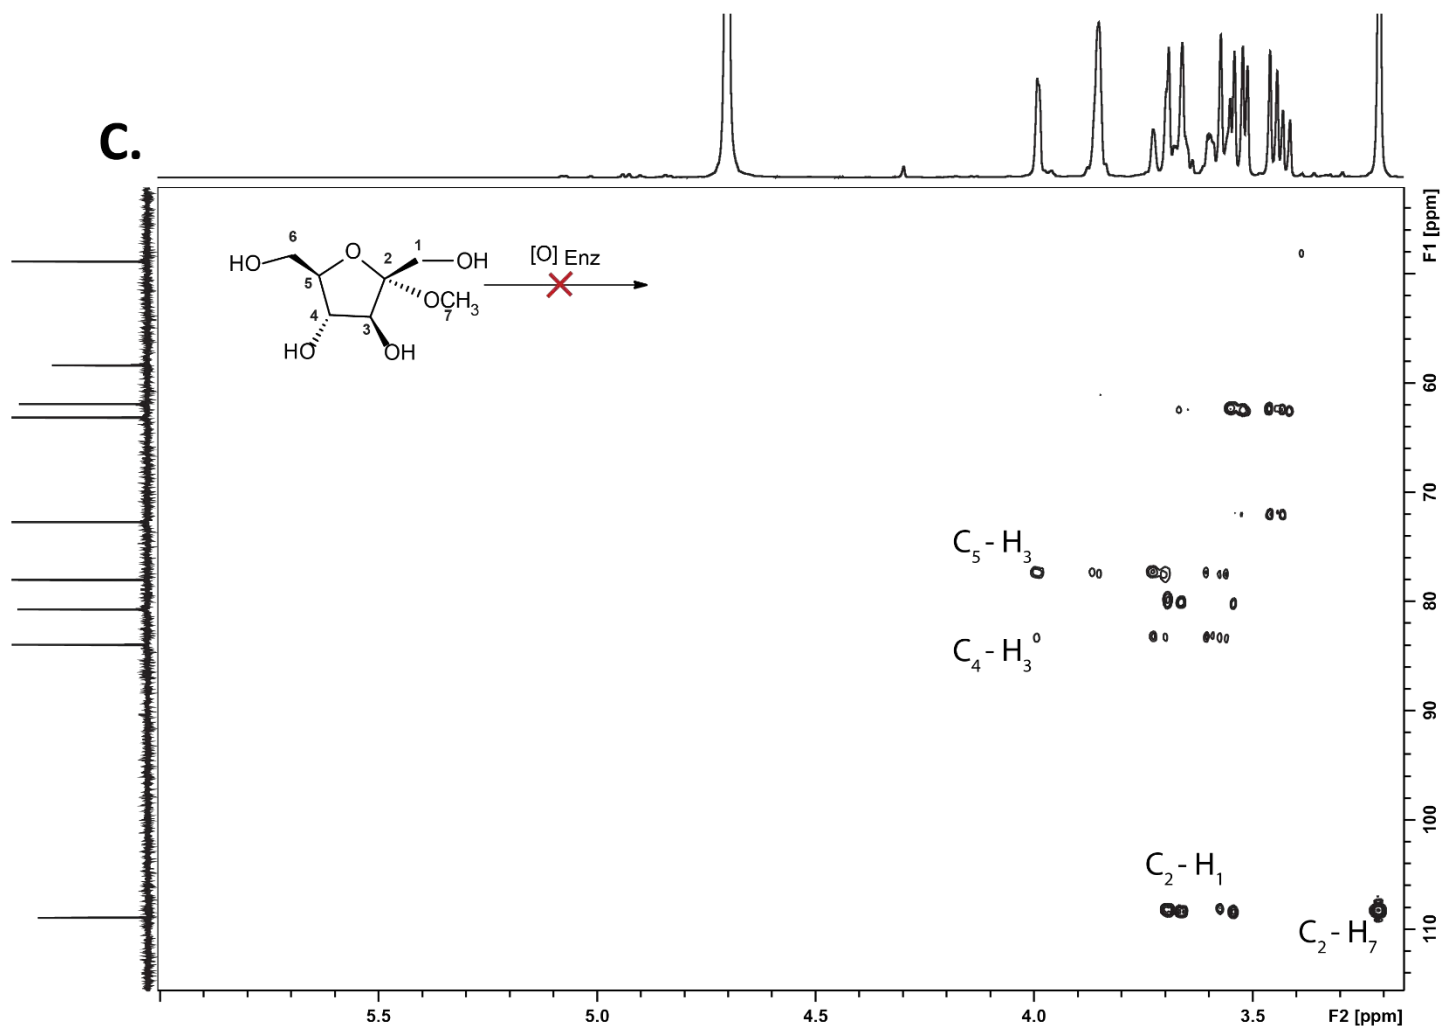

**Figure S15. Selective assignment of proton and carbon nuclei from  $^1\text{H}$ ,  $^{13}\text{C}$  HMBC of oxidation reaction components of *FgrAAO* with fructose derivatives. A. Methyl  $\beta$ -D-fructopyranoside. B. Methyl  $\beta$ -D-fructofuranoside. C. Methyl  $\alpha$ -D-fructofuranoside. Each black crosspeak corresponds to a  $^2\text{J}_{\text{C,H}}$ - or  $^3\text{J}_{\text{C,H}}$ -coupling interaction from the HMBC experiment. Two carbon peaks at 63.1 ppm and 72.7 ppm have been attributed to an impurity that is present in either the HRP, catalase or buffer solutions.**

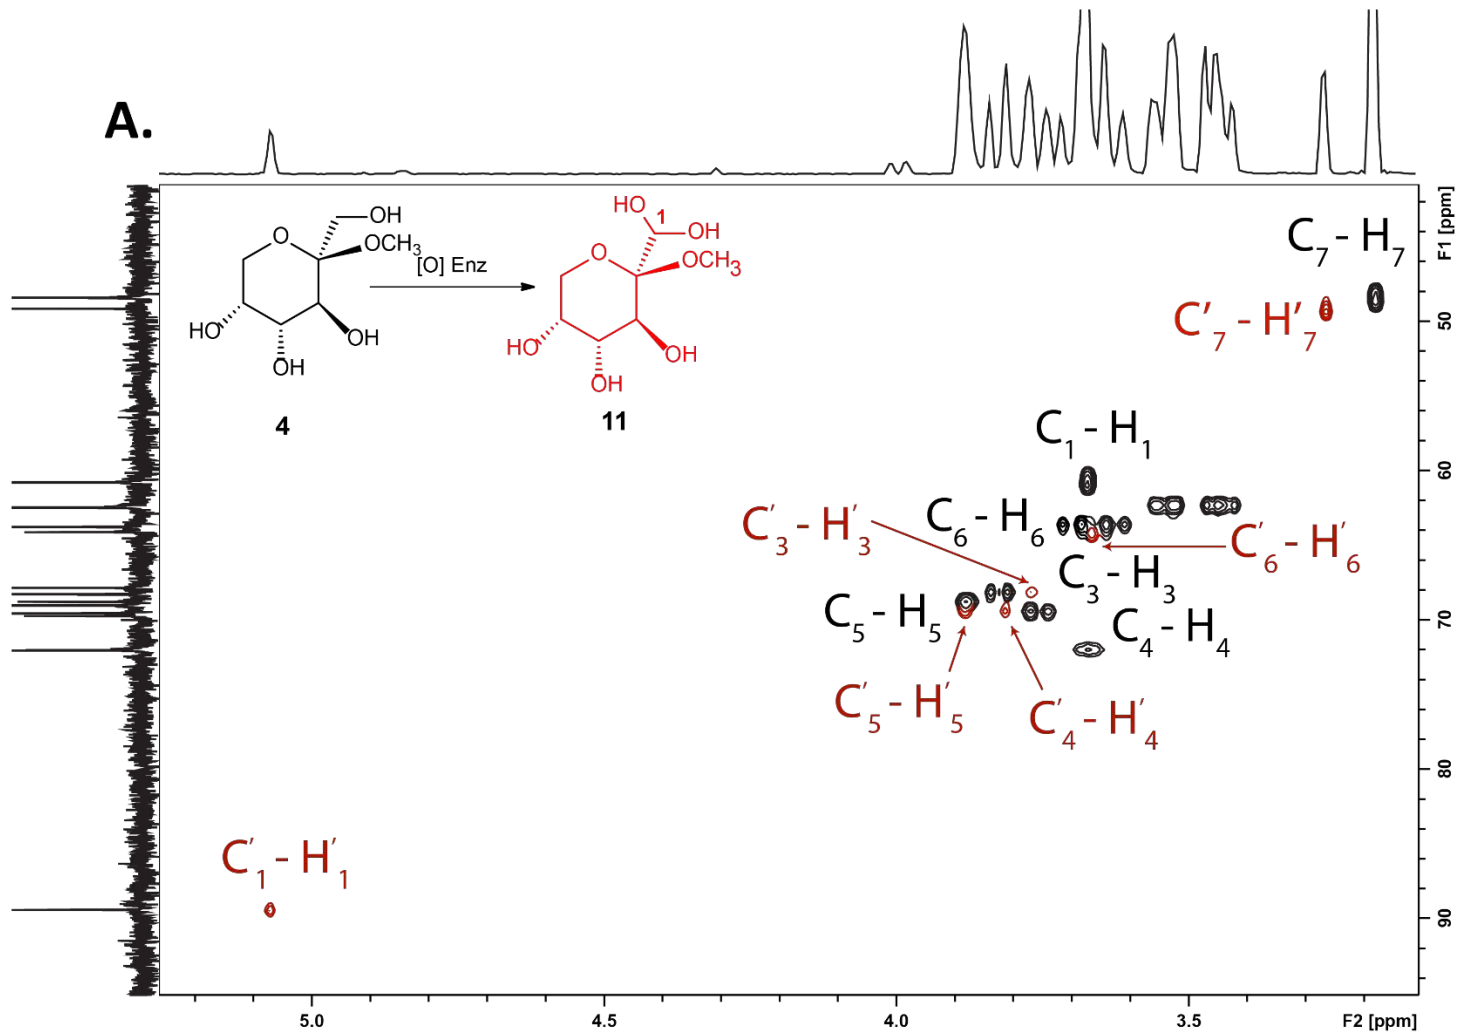



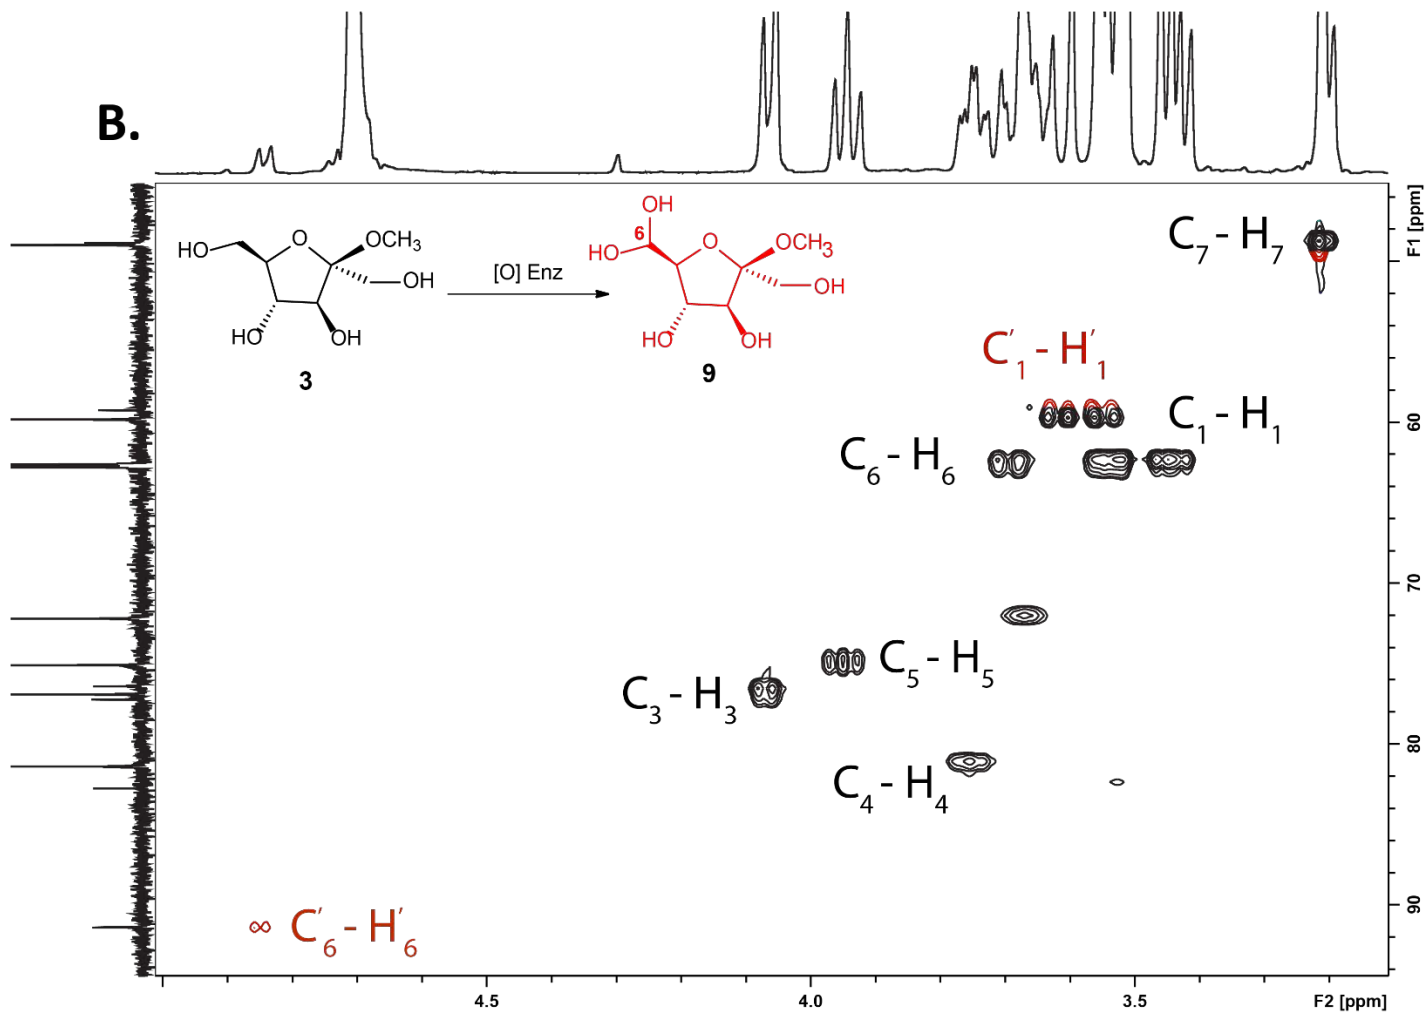

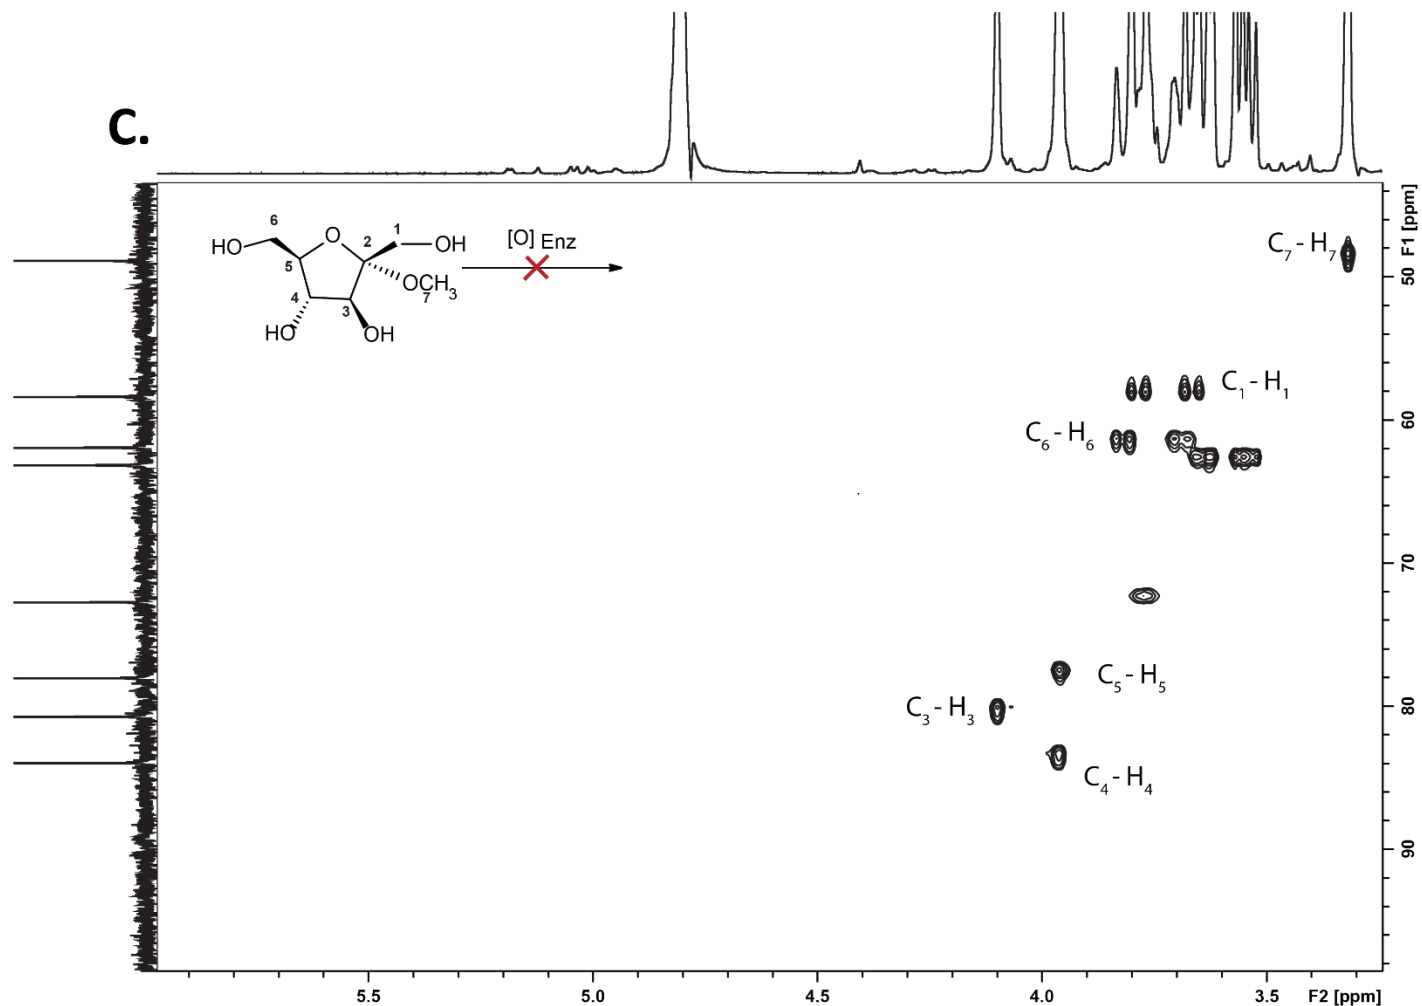

**Figure S16. Complete analysis of oxidation reaction components of *FoxAAO* of fructose derivatives from  $^1\text{H}$ ,  $^{13}\text{C}$  HSQC. A. Methyl  $\beta$ -D-fructopyranoside. B. Methyl  $\beta$ -D-fructofuranoside. C. Methyl  $\alpha$ -D-fructofuranoside. Each black crosspeak corresponds to a  $^1\text{J}_{\text{C,H}}$ -coupling interaction from the HSQC experiment. Two carbon peaks at 63.1 ppm and 72.7 ppm have been attributed to an impurity that is present in either the HRP, catalase or buffer solutions.**

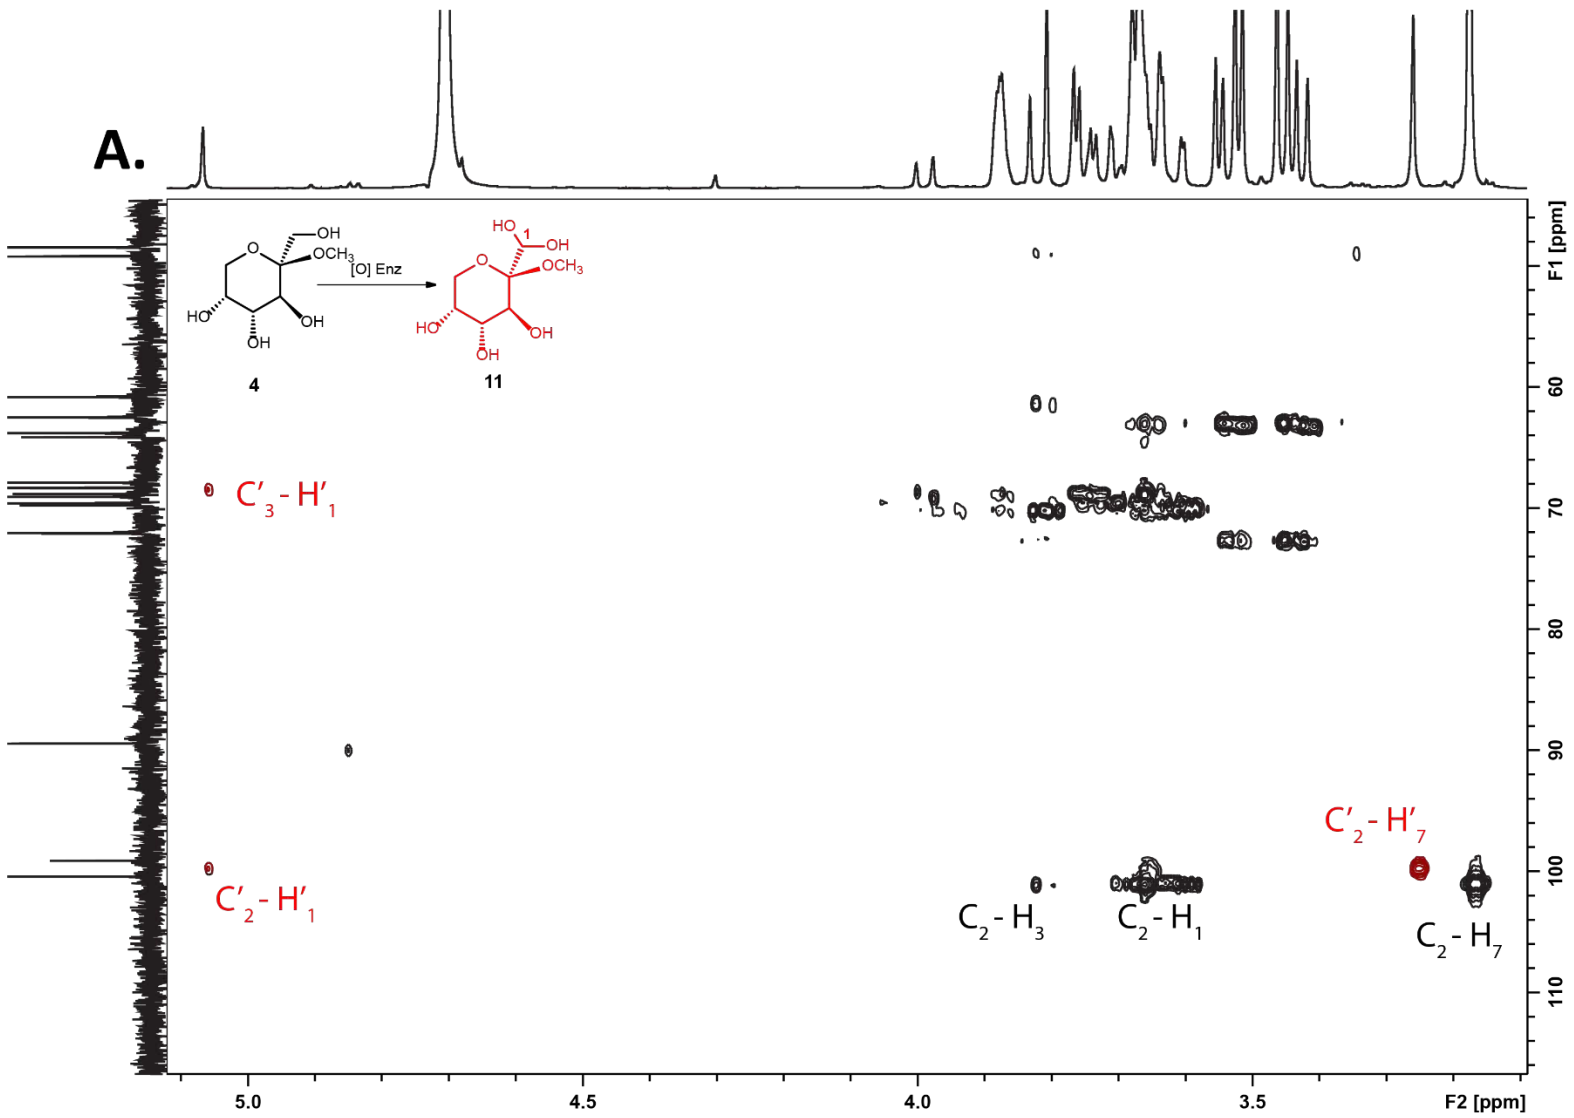

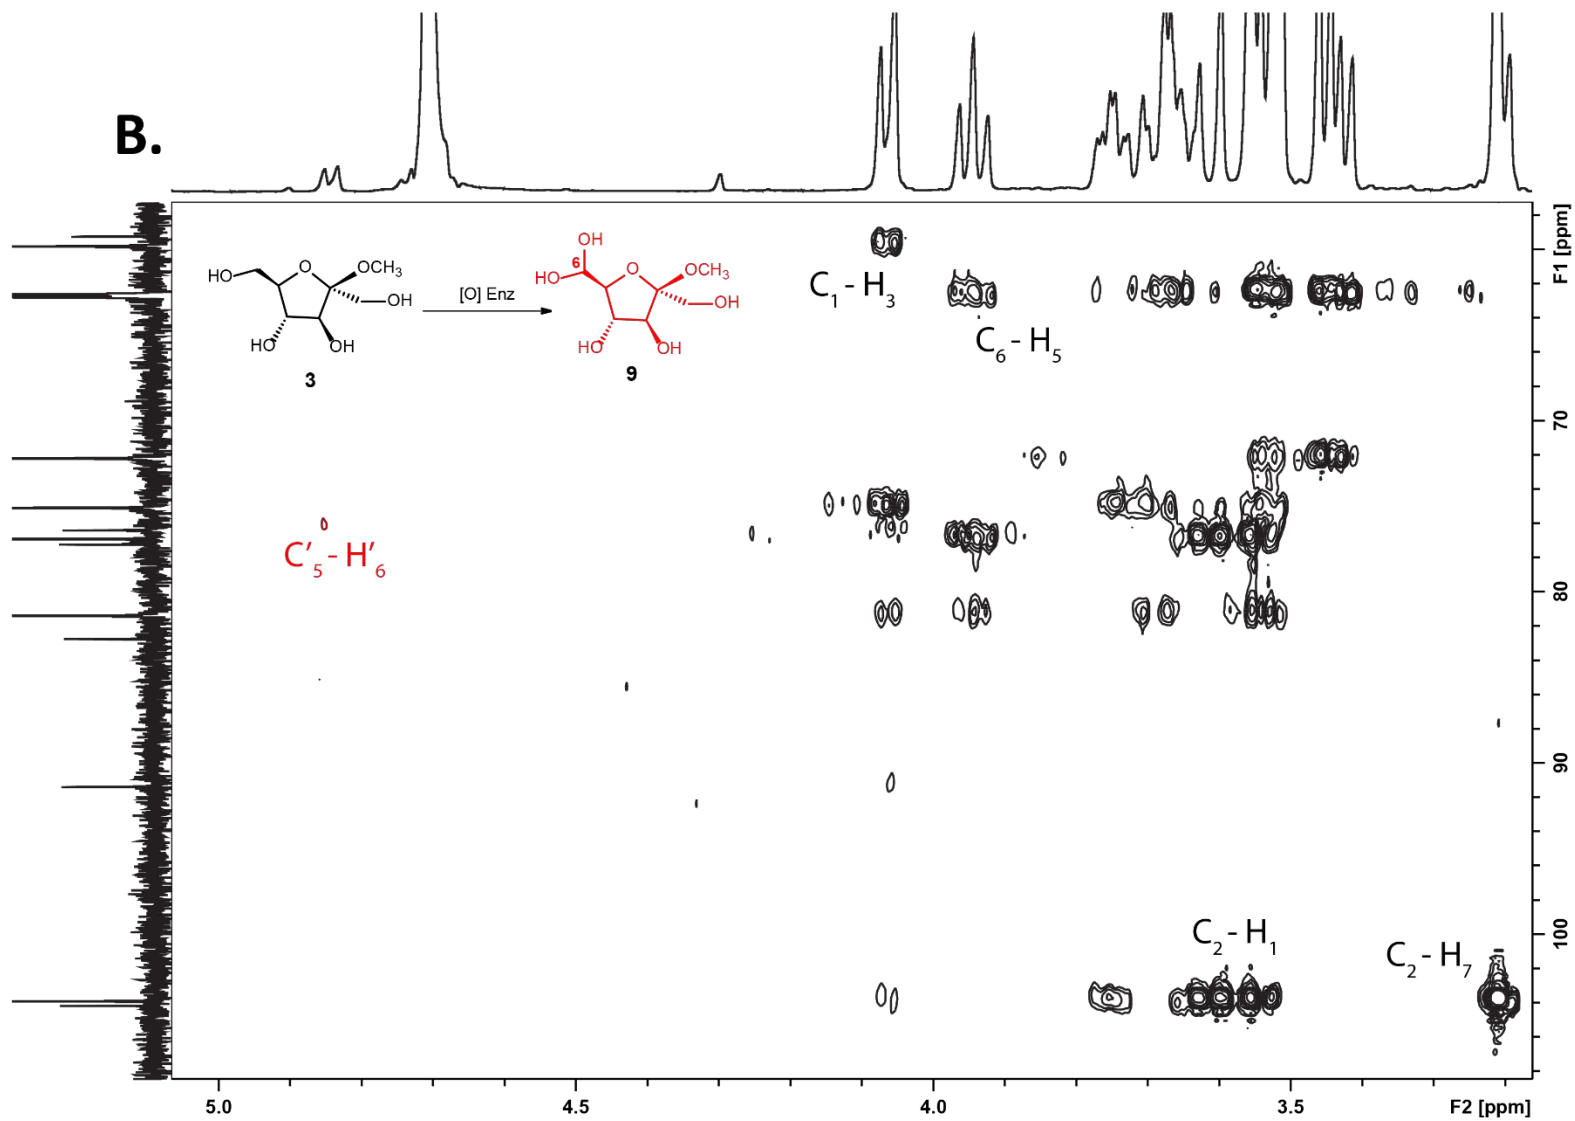

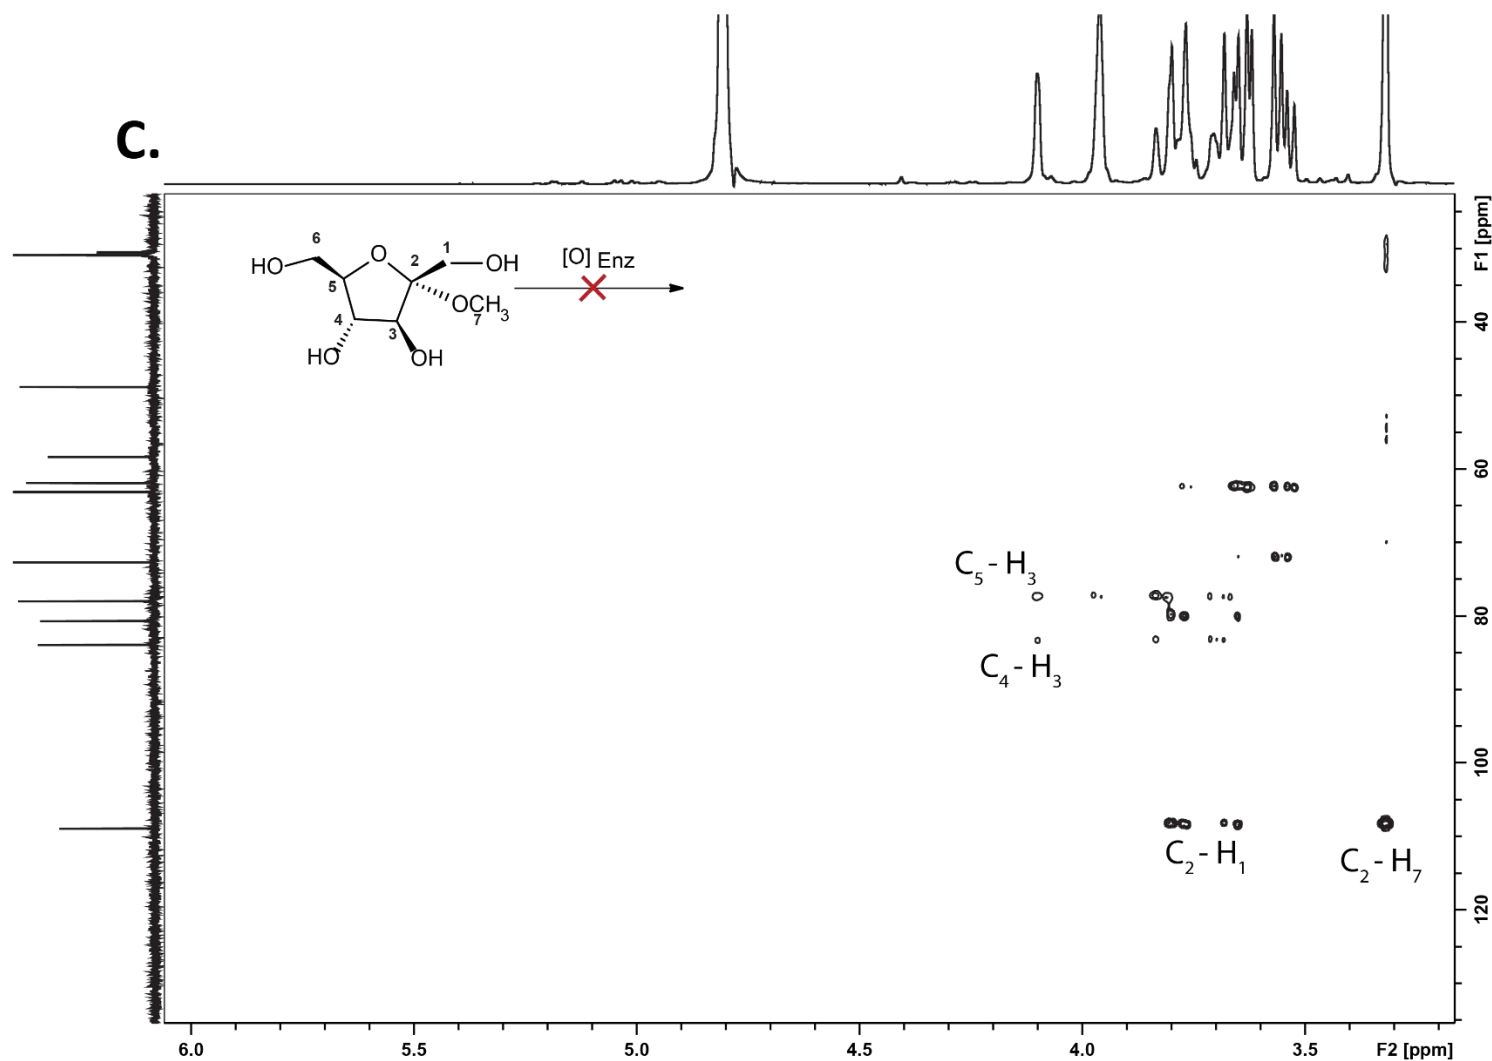

**Figure S17. Selective assignment of proton and carbon nuclei from  $^1\text{H}$ ,  $^{13}\text{C}$  HMBC of oxidation reaction components of *FoxAAO* with fructose derivatives. A. Methyl  $\beta$ -D-fructopyranoside. B. Methyl  $\beta$ -D-fructofuranoside. C. Methyl  $\alpha$ -D-fructofuranoside. Each black crosspeak corresponds to a  $^2\text{J}_{\text{C,H}}$ - or  $^3\text{J}_{\text{C,H}}$ -coupling interaction from the HMBC experiment. Two carbon peaks at 63.1 ppm and 72.7 ppm have been attributed to an impurity that is present in either the HRP, catalase or buffer solutions.**

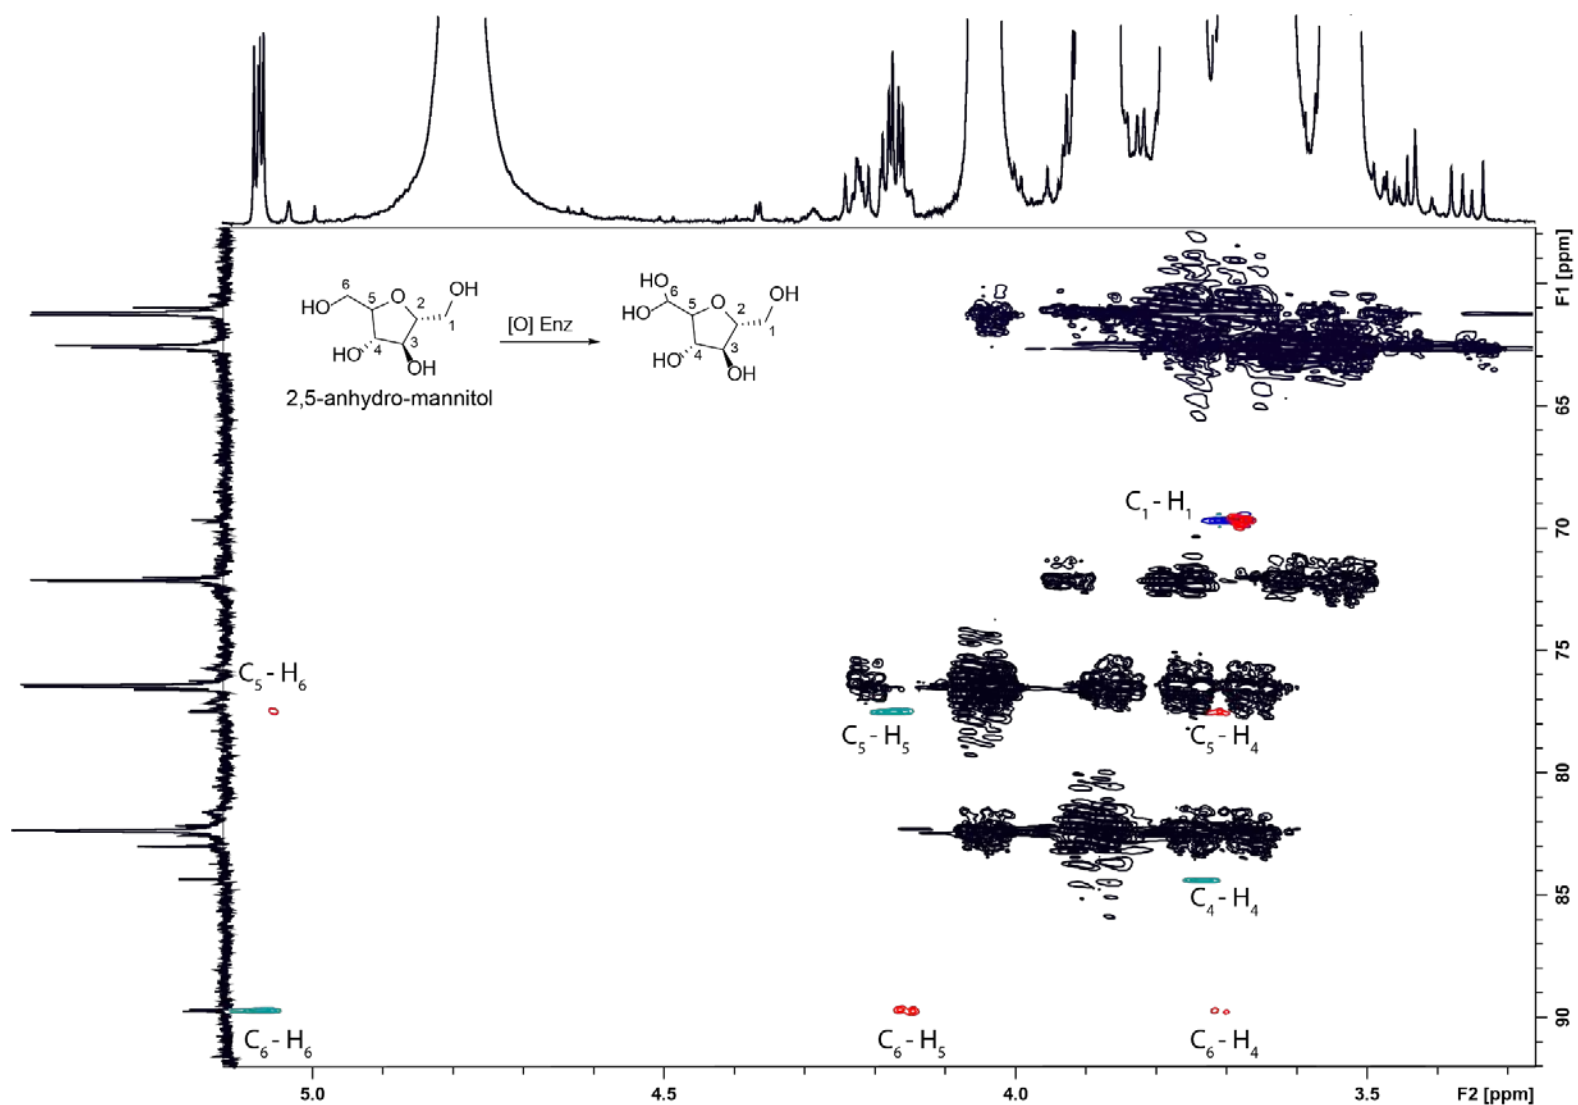

**Figure S18. Selective assignment of proton and carbon nuclei from  $^1\text{H}$ ,  $^{13}\text{C}$  HSQC and HMBC of oxidation product *FgrAAO* with 2,5-anhydro-mannitol.** Each teal and blue crosspeak corresponds to a  $^1J_{\text{C,H}}$ -coupling interaction from the HSQC experiment while each red crosspeak corresponds to a  $^2J_{\text{C,H}}$ - or  $^3J_{\text{C,H}}$ -coupling interaction from the HMBC experiment. Two carbon peaks at 63.1 ppm and 72.7 ppm have been attributed to an impurity that is present in either the HRP, catalase or buffer solutions.

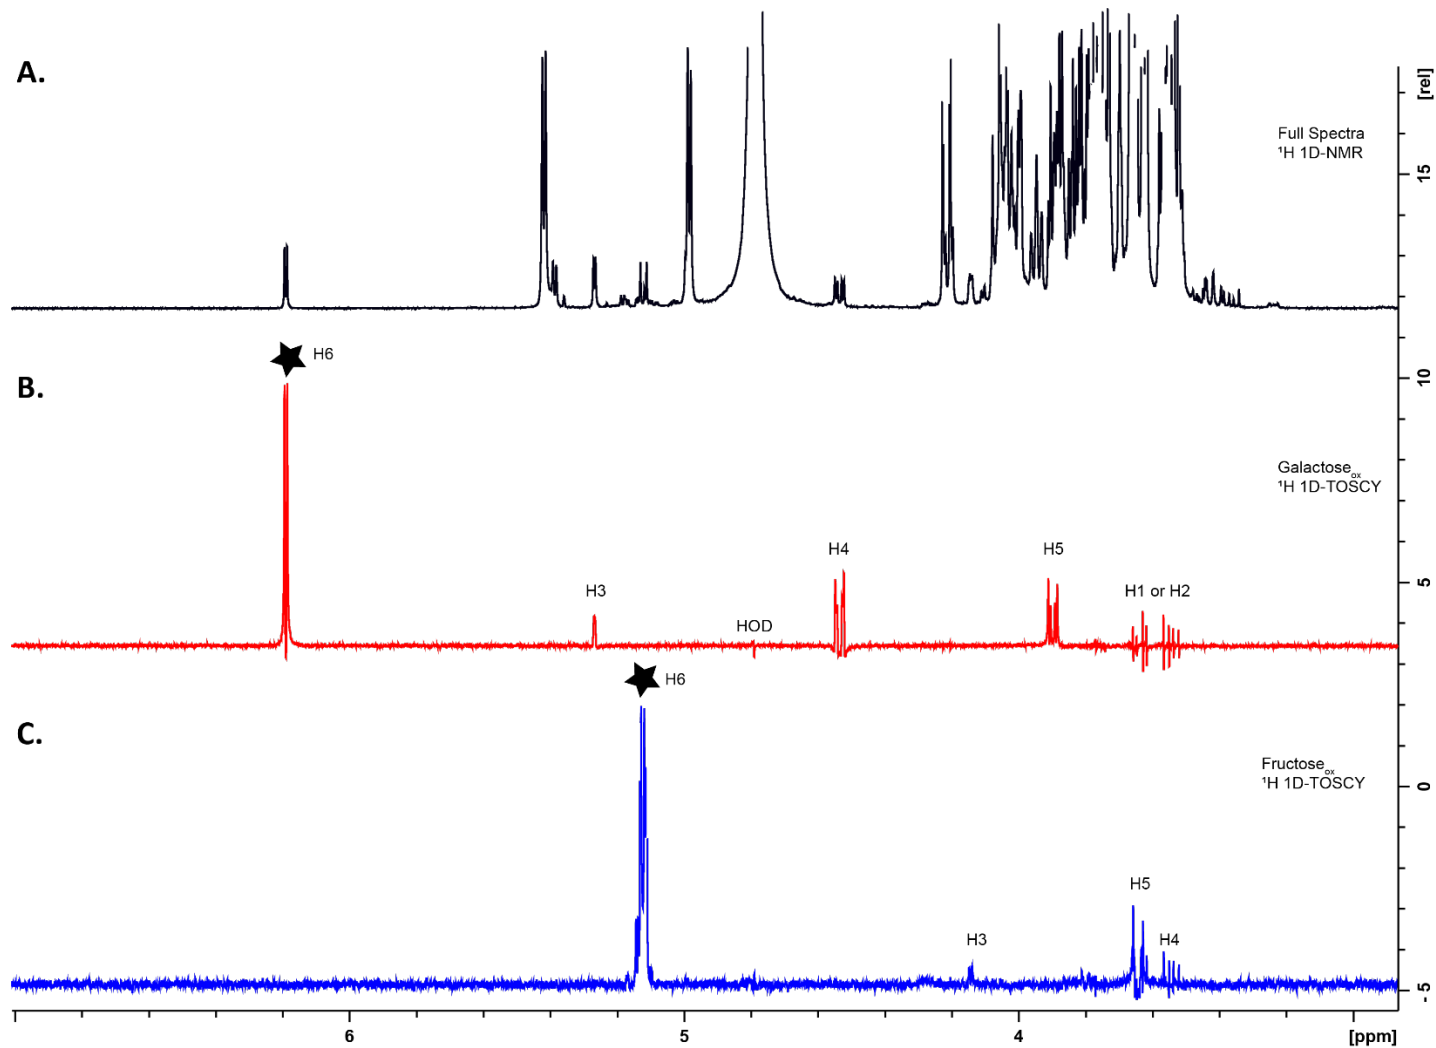

**Figure S19. Selective  $^1\text{H}$  1D-TOSCY experiment of oxidized raffinose by *FgrAAO*.** A. New proton peaks in the proton region between 5.0-6.5 ppm were targeted based on the full 1D-NMR spectrum. Spectra corresponding to individual spin systems are displayed in various colours with B. the galactose ring of oxidized raffinose in red. C. the fructose ring in oxidized raffinose in blue. Irradiations from  $^1\text{H}$  1D-TOSCY experiments are displayed with black stars above corresponding peaks.

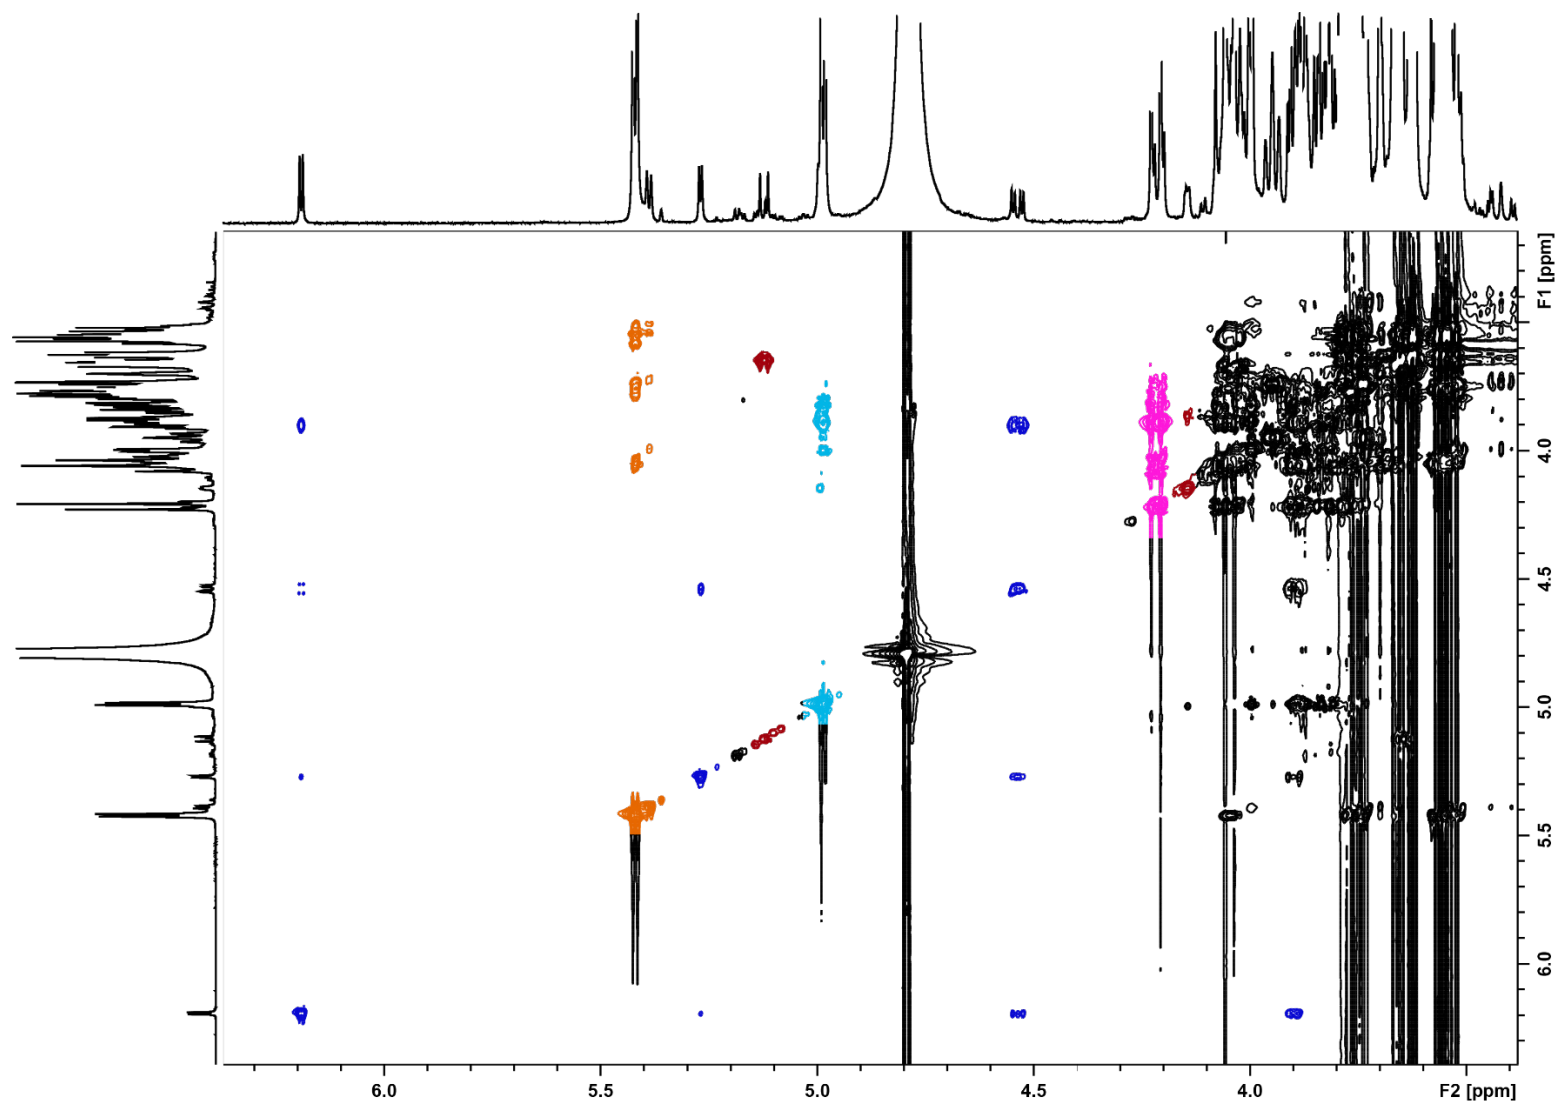

**Figure S20.**  $^1\text{H}$  2D-TOSCY experiment oxidized raffinose by *FgrAAO*. Each peak indicates protons that are coupled through magnetization transfer. Selective assignment of crosspeaks originating from the same spin system are shown in matching colours specific to each monosaccharide with oxidized/unoxidized galactose shown in dark blue and light blue respectively; oxidized/unoxidized fructose shown in dark red and magenta respectively; glucose in orange.



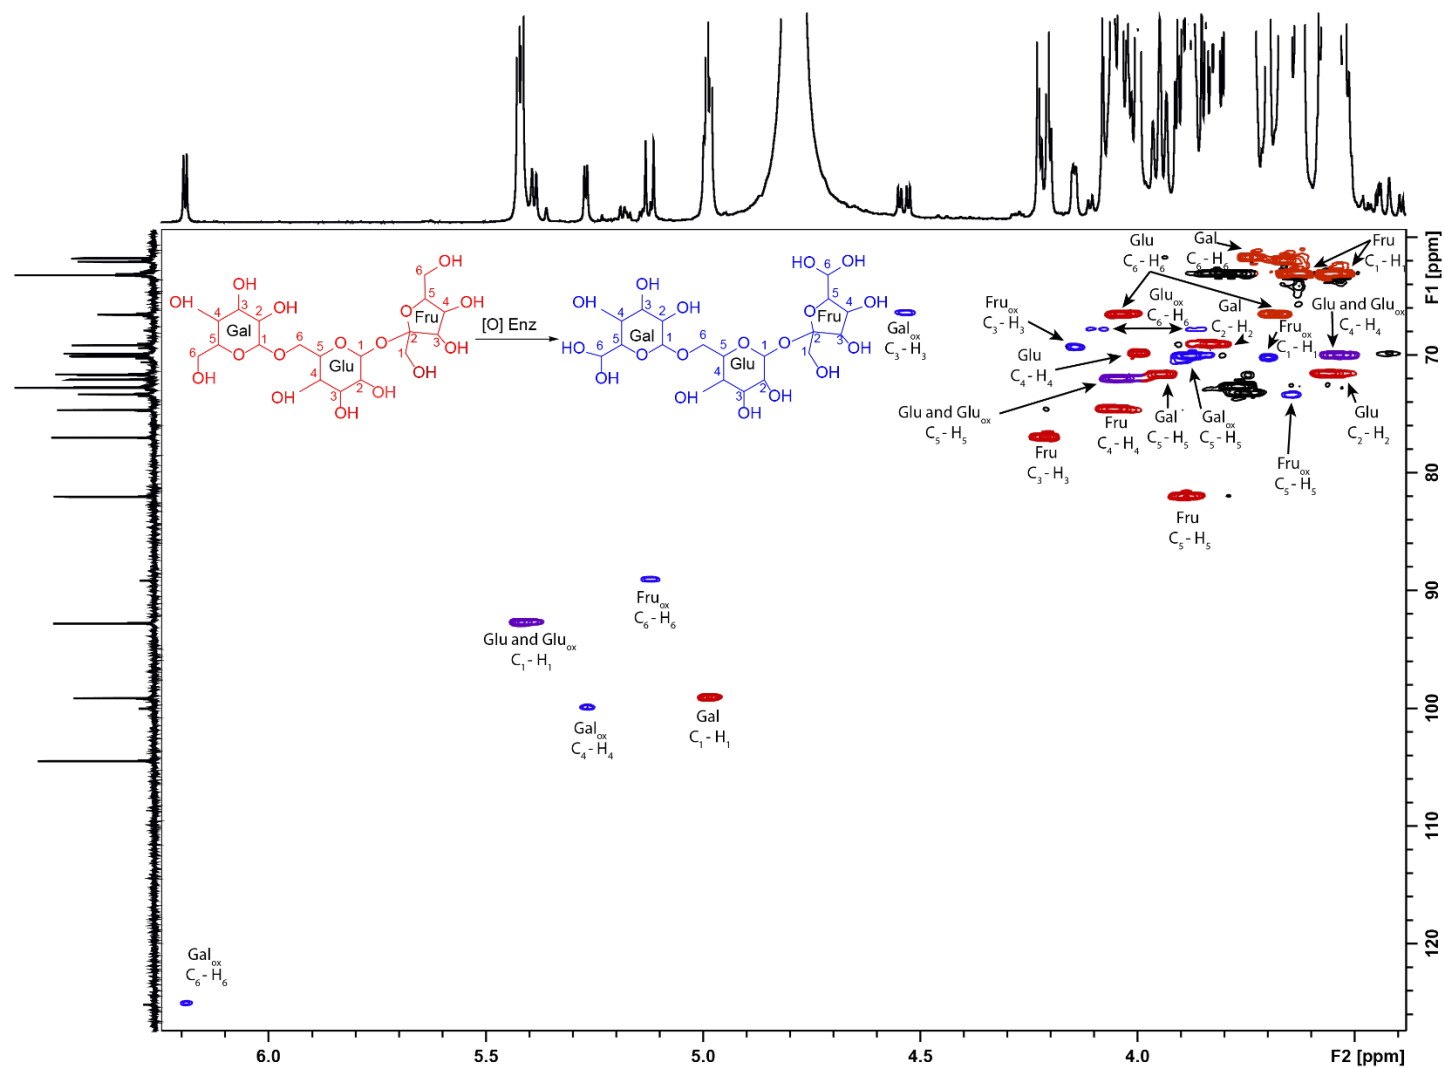

**Figure S21. Complete assignment of proton and carbon nuclei from oxidized raffinose by *FgrAAO* using  $^1\text{H}$ ,  $^{13}\text{C}$  HSQC experiments.** Each crosspeak corresponds to a  $^1\text{J}_{\text{C,H}}$ -coupling interaction from the HSQC experiment. Red crosspeaks correspond to unoxidized substrate, blue crosspeaks correspond to oxidized product and purple crosspeaks correspond to signals overlapping from substrate and product. Black crosspeaks are from impurities associated with the buffer, HRP and catalase mixture. The notation stated the sugar ring and its corresponding atoms(s) below it. Abbreviations used: Gal, galactose; Glu, glucose, Fru, fructose; ox, Oxidized.

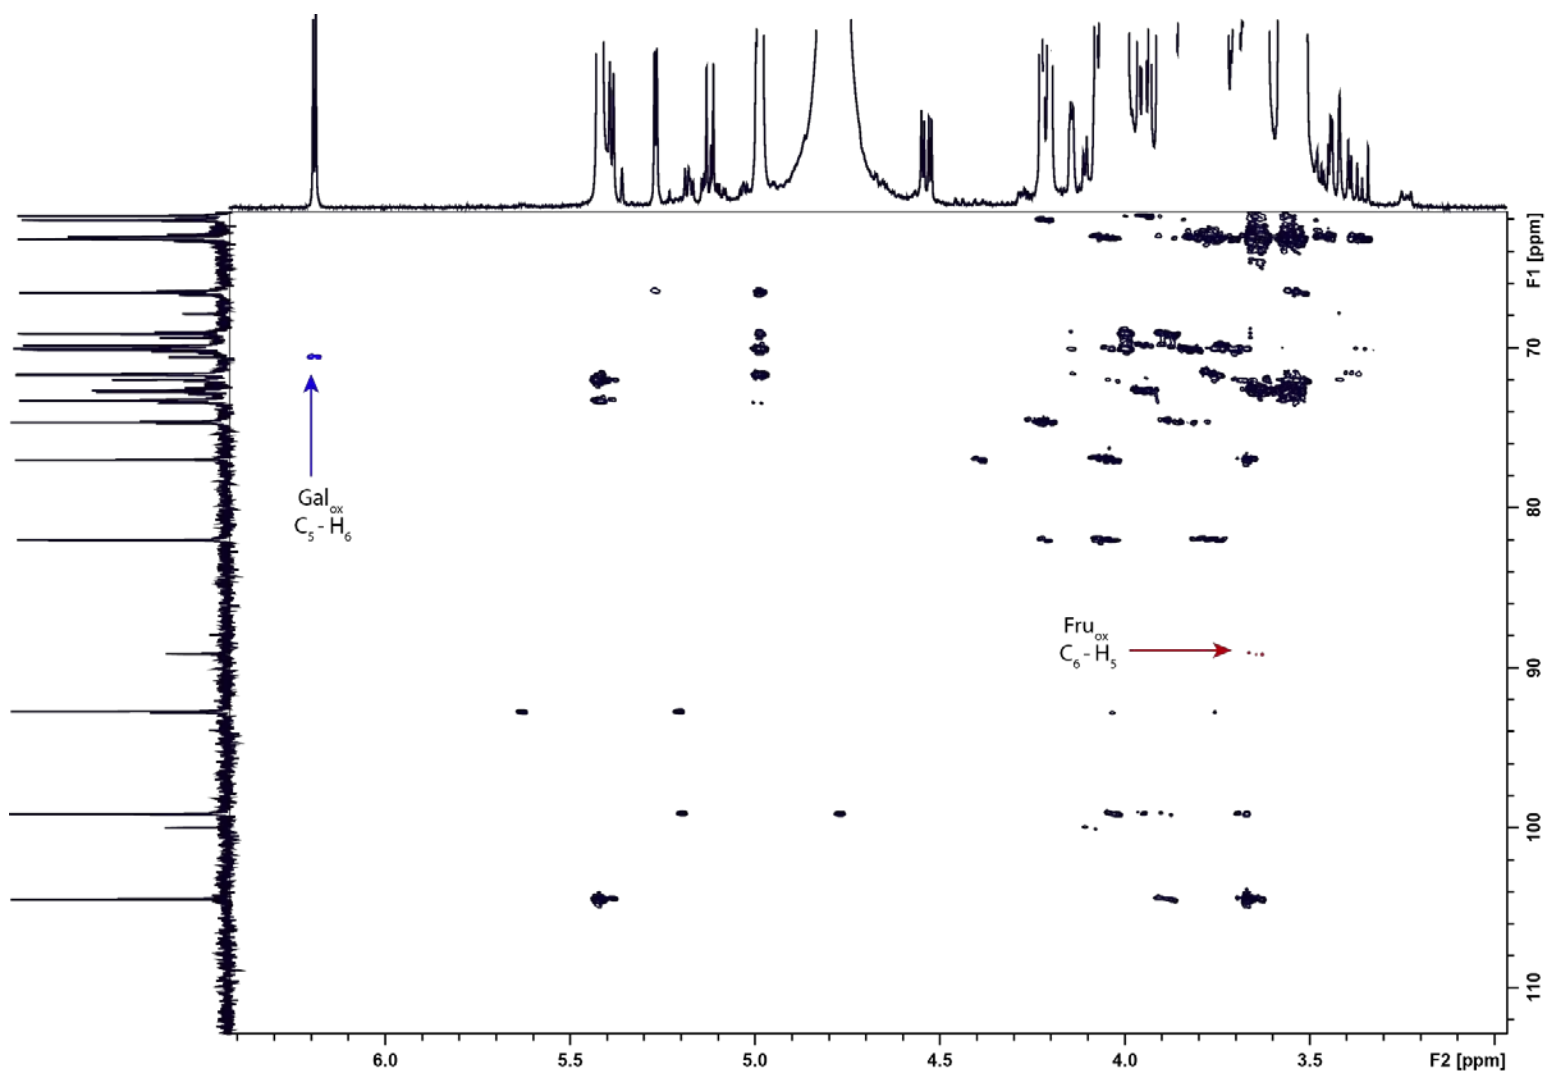

**Figure S22. Selective assignment of proton and carbon nuclei from  $^1\text{H}$ ,  $^{13}\text{C}$  HMBC of oxidation reaction components of *FgrAAO* with raffinose.** Each crosspeak corresponds to a  $^2\text{J}_{\text{C,H}}$ - or  $^3\text{J}_{\text{C,H}}$ -coupling interaction from the HMBC experiment. Crosspeaks for C5-H6 on the galactose ring in the product and C6-H5 on the fructose ring in the oxidized product are highlighted in blue and red, respectively. Two carbon peaks at 63.1 ppm and 72.7 ppm have been attributed to an impurity that is present in either the HRP, catalase or buffer solutions.

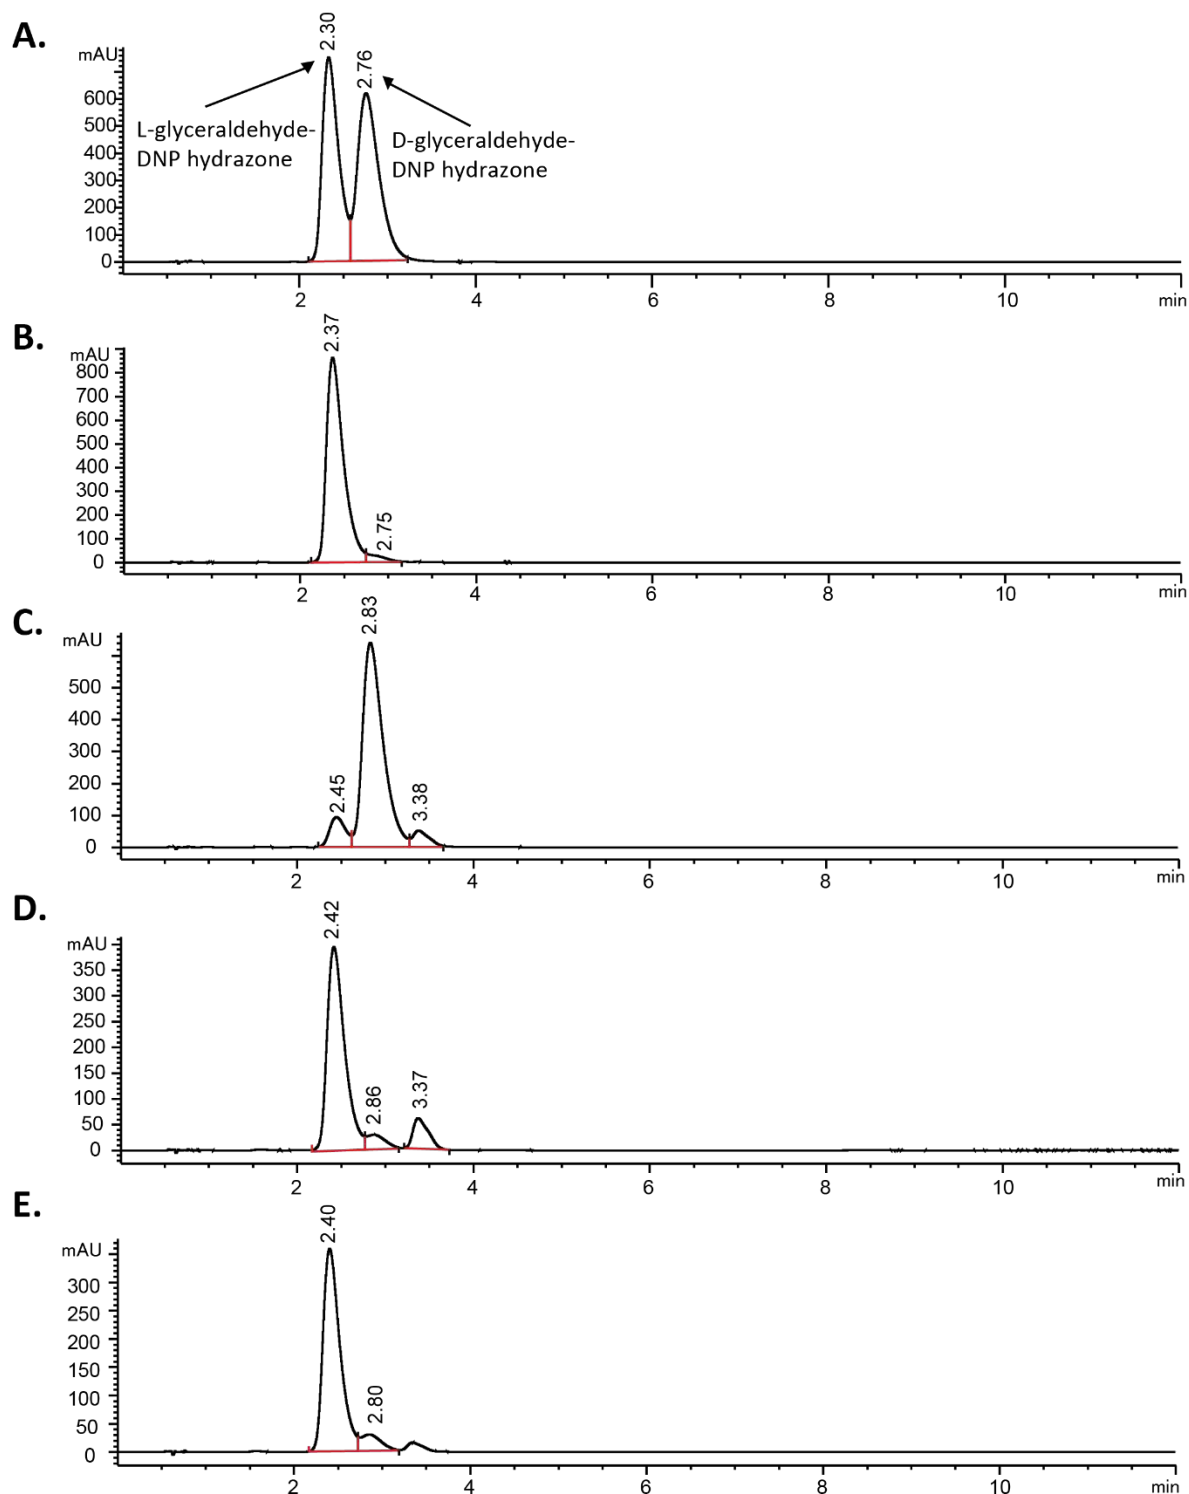

**Figure S23. Stereochemistry determination of glycerol oxidation by *FgrAAO* and *FoxAAO*.**

A. Chromatogram of *L/D*-glyceraldehyde-hydrazone. B. Glyceraldehyde-hydrazone composition after *FgrGalOx* oxidation of glycerol. C. Glyceraldehyde-hydrazone composition after *CgrAlcOx* oxidation of glycerol. D. Glyceraldehyde-hydrazone composition after *FgrAAO* oxidation of glycerol. E. Glyceraldehyde-hydrazone composition after *FoxAAO* oxidation of glycerol. Peaks are labelled with retention times.

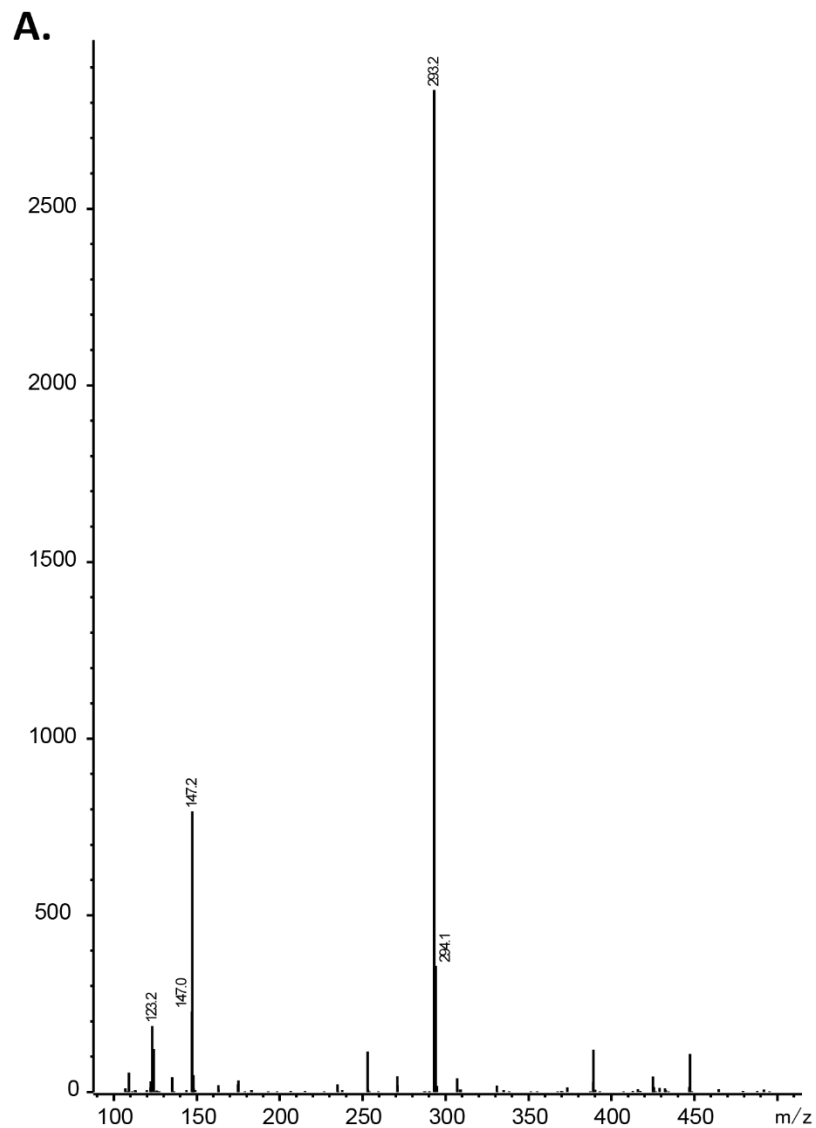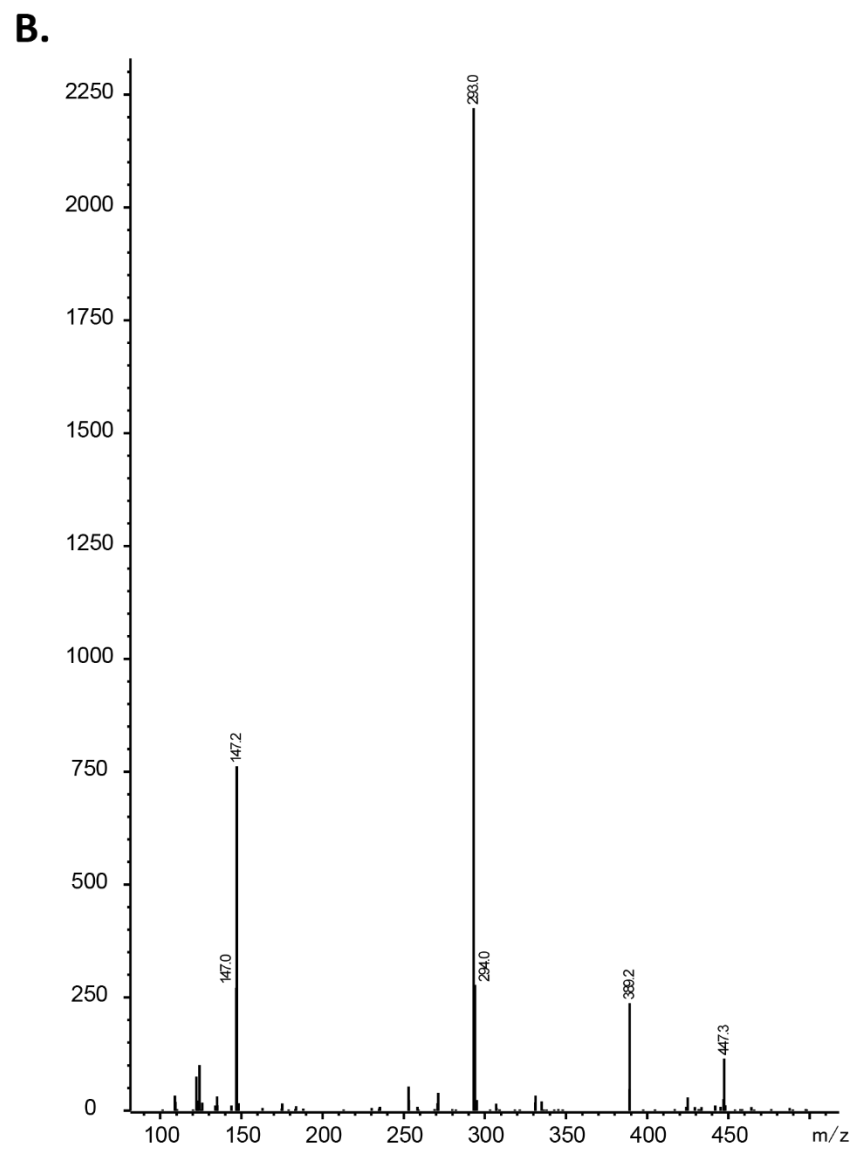

**Figure S24. Representative mass spectrum of glycerol oxidation by *FgrGalOx* and *CgrAlcOx*.** A. L-glyceraldehyde-hydrazone from *FgrGalOx* oxidation (peak at 2.37, Fig. S23). B. D-glyceraldehyde-hydrazone from *CgrAlcOx* oxidation (peak at 2.83, Fig. S23).

## Supporting References

1. Deacon SE, Mahmoud K, Spooner RK, Firbank SJ, Knowles PF, Phillips SEV, McPherson MJ. Enhanced Fructose Oxidase Activity in a Galactose Oxidase Variant. *ChemBioChem*. 2004;5(7):972-9.
2. Sun L, Petrounia IP, Yagasaki M, Bandara G, Arnold FH. Expression and stabilization of galactose oxidase in *Escherichia coli* by directed evolution. *Protein Eng, Des Sel*. 2001;14(9):699-704.
3. Escalettes F, Turner NJ. Directed Evolution of Galactose Oxidase: Generation of Enantioselective Secondary Alcohol Oxidases. *ChemBioChem*. 2008;9(6):857-60.
4. Lippow SM, Moon TS, Basu S, Yoon S-H, Li X, Chapman BA, Robison K, Lipovšek D, Prather KLJ. Engineering Enzyme Specificity Using Computational Design of a Defined-Sequence Library. *Chem Biol*. 2010;17(12):1306-15.
5. Rannes JB, Ioannou A, Willies SC, Grogan G, Behrens C, Flitsch SL, Turner NJ. Glycoprotein Labeling Using Engineered Variants of Galactose Oxidase Obtained by Directed Evolution. *J Am Chem Soc*. 2011;133(22):8436-9.
6. Deacon SE, McPherson MJ. Enhanced Expression and Purification of Fungal Galactose Oxidase in *Escherichia coli* and Use for Analysis of a Saturation Mutagenesis Library. *ChemBioChem*. 2011;12(4):593-601.
7. Wilkinson D, Akumanyi N, Hurtado-Guerrero R, Dawkes H, Knowles PF, Phillips SEV, McPherson MJ. Structural and kinetic studies of a series of mutants of galactose oxidase identified by directed evolution. *Protein Eng, Des Sel*. 2004;17(2):141-8.
8. Mathieu Y, Offen WA, Forget SM, Ciano L, Viborg AH, Blagova E, Henrissat B, Walton PH, Davies GJ, Brumer H. Discovery of a Fungal Copper Radical Oxidase with High Catalytic Efficiency toward 5-Hydroxymethylfurfural and Benzyl Alcohols for Bioprocessing. *ACS Catal*. 2020;10(5):3042-58.
9. Whittaker MM, Whittaker JW. Catalytic Reaction Profile for Alcohol Oxidation by Galactose Oxidase. *Biochemistry*. 2001;40(24):7140-8.
10. Yin D, Urresti S, Lafond M, Johnston EM, Derikvand F, Ciano L, Berrin J-G, Henrissat B, Walton PH, Davies GJ, Brumer H. Structure–function characterization reveals new catalytic diversity in the galactose oxidase and glyoxal oxidase family. *Nat Commun*. 2015;6(1):10197.
11. Dijkman WP, Fraaije MW. Discovery and Characterization of a 5-Hydroxymethylfurfural Oxidase from *Methylovorus* sp. Strain MP688. *Appl Environ Microbiol*. 2014;80(3):1082-90.
12. Carro J, Ferreira P, Rodríguez L, Prieto A, Serrano A, Balcells B, Ardá A, Jiménez-Barbero J, Gutiérrez A, Ullrich R, Hofrichter M, Martínez AT. 5-hydroxymethylfurfural conversion by fungal aryl-alcohol oxidase and unspecific peroxygenase. *FEBS J*. 2015;282(16):3218-29.
13. Kadowaki MAS, Godoy M, Kumagai PS, Costa-Filho AJ, Mort A, Prade RA, Polikarpov I. Characterization of a New Glyoxal Oxidase from the Thermophilic Fungus *Myceliophthora thermophila* M77: Hydrogen Peroxide Production Retained in 5-Hydroxymethylfurfural Oxidation. *Catalysts*. 2018;8(10):476.
14. Daou M, Yassine B, Wikee S, Record E, Duprat F, Bertrand E, Faulds CB. *Pycnoporus cinnabarinus* glyoxal oxidases display differential catalytic efficiencies on 5-hydroxymethylfurfural and its oxidized derivatives. *Fungal Biol Biotechnol*. 2019;6(1):4.
